# Supplementary material for: Detection of catechins using a fluorescent molecule and its application toward the evaluation of astringent intensity
Source: Royal Society of Chemistry journal article supplement (doi:10.1039/d2an00990k), 2022-01-01
Supplement: d2an00990k1.pdf [file d2an00990k1.pdf]

## Electronic Supplementary Information

# Detection of catechins using a fluorescent molecule and its application toward the evaluation of astringent intensity

Nobuyuki Hayashi,<sup>\*a</sup> Tomomi Ujihara<sup>a</sup> and Shigeki Jin<sup>b,c</sup>

<sup>a</sup>Institute of Food Research, National Agriculture and Food Research Organization (NARO), 2-1-12 Kannondai, Tsukuba, Ibaraki 305-8642, Japan

<sup>b</sup>Department of Forensic Medicine, Graduate School of Medicine, Hokkaido University, N15 W 7 Kita-ku, Sapporo, Hokkaido 060-8638, Japan

<sup>c</sup>Center for Cause of Death Investigation, Graduate School of Medicine, Hokkaido University, N15W7 Kita-ku, Sapporo, Hokkaido 060-8638, Japan

(\*hayn@affrc.go.jp)

### Contents

|                                                                                      |     |
|--------------------------------------------------------------------------------------|-----|
| <b>Fig S1.</b> Two modes of aromatic/aromatic interactions.                          | S2  |
| <b>Fig S2.</b> <sup>1</sup> H NMR spectra of green tea samples.                      | S3  |
| <b>Fig S3.</b> Excitation and Emission spectra.                                      | S4  |
| <b>Fig S4.</b> Relation between the sensor response and the catechin concentrations. | S5  |
| <b>Table S1.</b> Concentrations of catechins (2–9) in the green tea samples.         | S6  |
| <b>HPLC analysis of catechin concentrations of green tea infusions.</b>              | S6  |
| <b>Cartesian coordinates, number of imaginary frequencies, and energies</b>          |     |
| (1) Complexes of sensor molecule <b>1</b> and EGCg <b>2</b>                          | S7  |
| (2) Complexes of sensor molecule <b>1</b> and EGC <b>4</b>                           | S29 |
| (3) Complexes of sensor molecule <b>1</b> and GCg <b>6</b>                           | S43 |
| (4) Complexes of sensor molecule <b>1</b> and GC <b>8</b>                            | S66 |

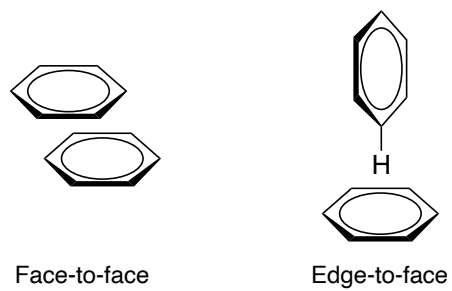

**Fig. S1.** Two modes of aromatic/aromatic interactions.

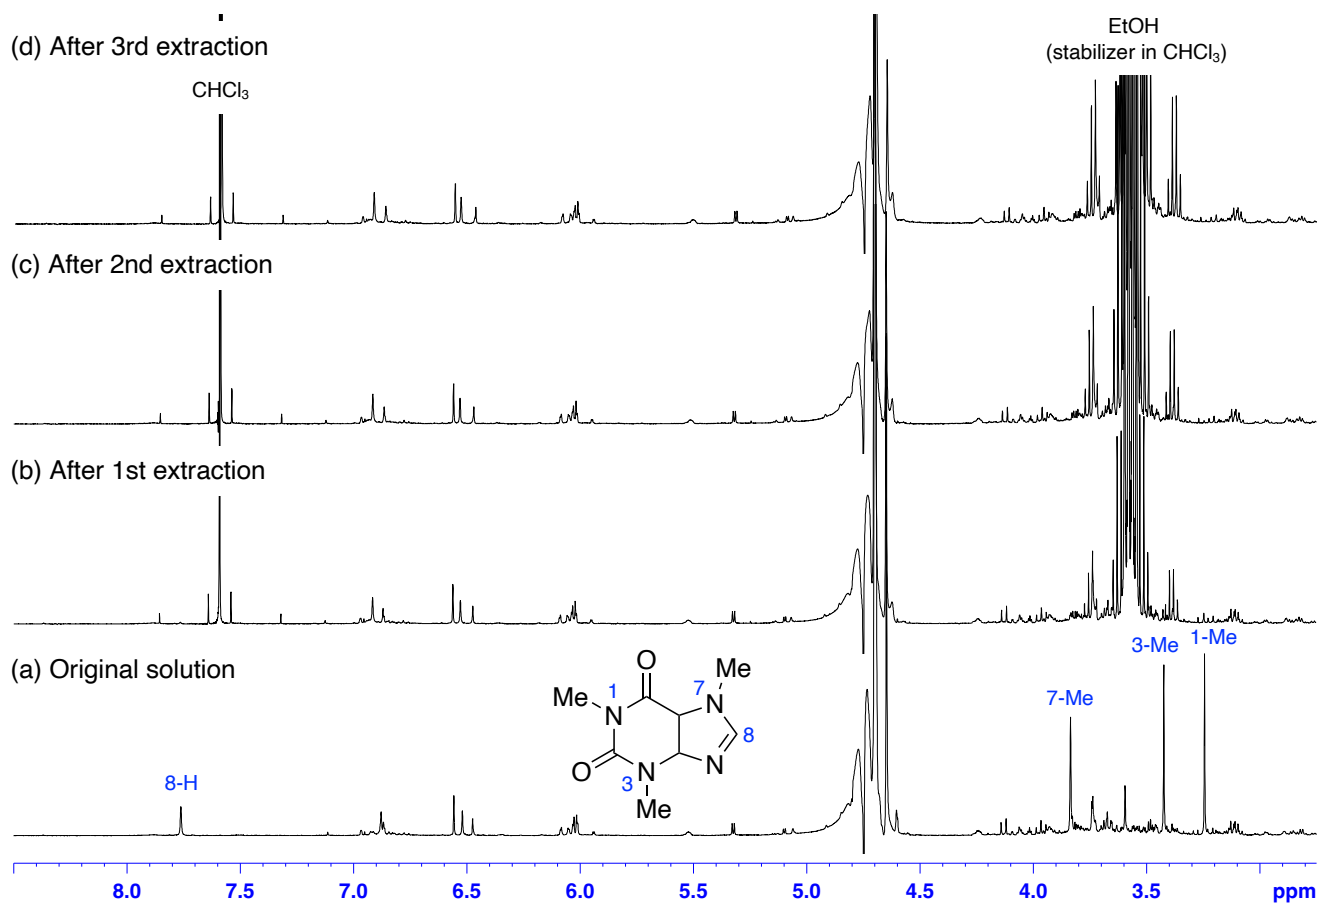

**Fig. S2.** <sup>1</sup>H NMR spectra of green tea samples.<sup>†</sup>

(a) Original solution, (b) aqueous layer after the first extraction with chloroform, (c) aqueous layer after the second extraction with chloroform, and (d) aqueous layer after the third extraction with chloroform.

<sup>†</sup> The NMR samples were prepared by adding an equal volume of deuterium oxide to the tea samples. <sup>1</sup>H NMR spectra were measured on an Avance 400 spectrometer (400 MHz, Bruker Biospin, Rheinstetten, Germany) with a CPBBO BB-1 H/19 F/D cryogenic probe at 298 K. The solvent signal was suppressed by presaturation.

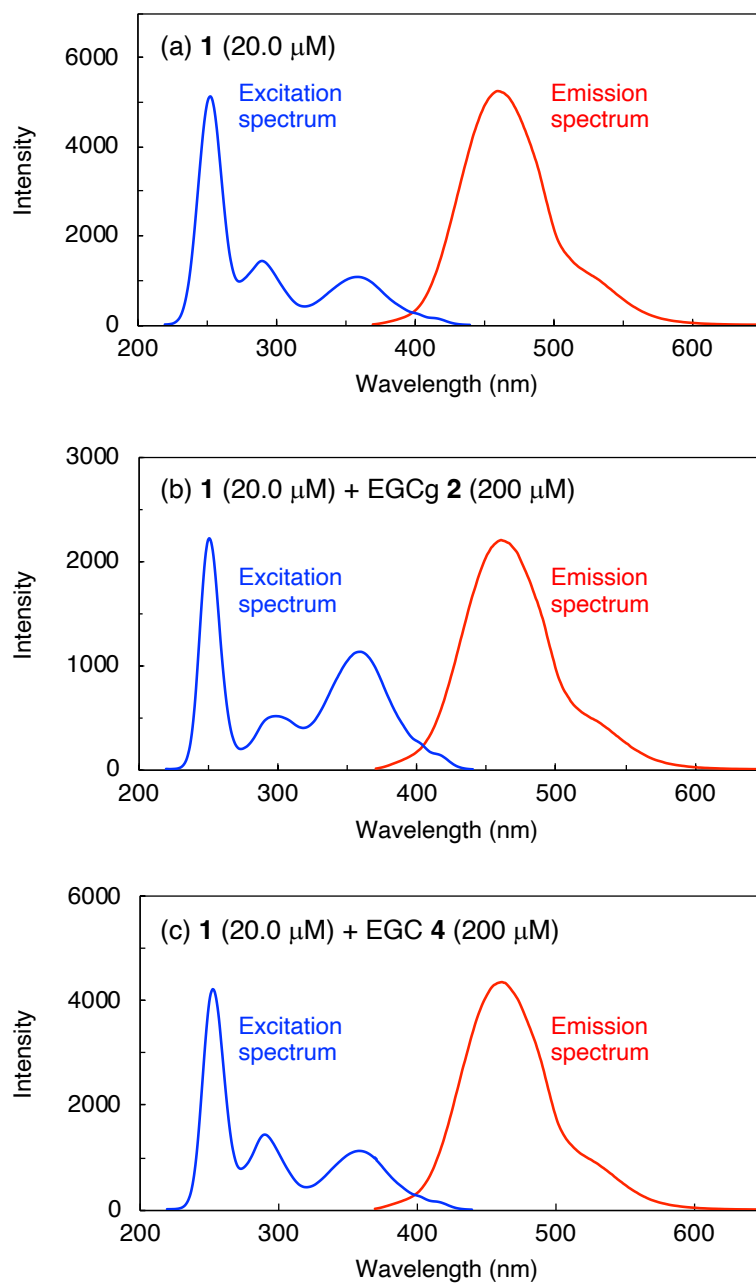

**Fig. S3.** Excitation and Emission spectra of sensor molecule **1** solution (a), mixed solutions of **1** + EGCg **2** (b), and **1** + EGC **4** (c) at pH 4.7 and 298 K (fluorescence spectrometer: FP-8300, JASCO; temperature control unit: EHC-813, JASCO).

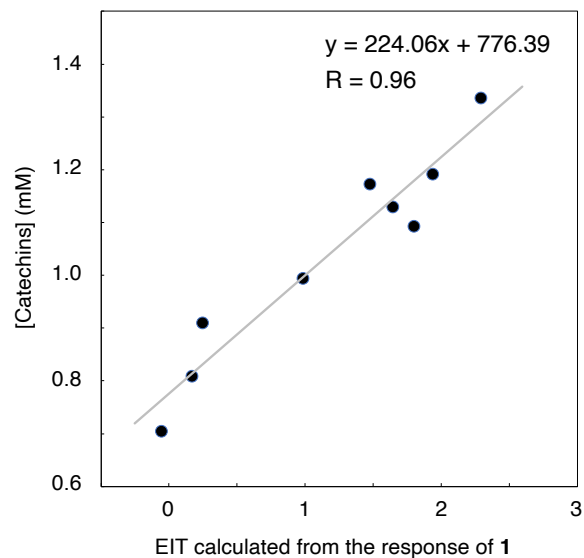

**Fig. S4.** Relation between the EIT values of green tea infusions calculated from the response of sensor molecule **1** and the catechin concentrations.

$$[\text{Catechins}] = [\text{EGCg}] + 1.004[\text{ECg}] + 0.306[\text{EGC}] + 0.184[\text{EC}] + 1.055[\text{GCg}] + 1.041[\text{Cg}] + 0.336[\text{GC}] + 0.170[\text{C}].^{\S}$$

The linear approximation formula and linear correlation coefficient (R) are provided in the graph area.

---

<sup>§</sup> The concentration of each catechin was corrected by multiplying the relative response intensity of sensor **1** for each catechin based on Fig. 4.

**Table S1.** Concentrations ( $\mu\text{M}$ ) of catechins (2–9) in the green tea infusions.<sup>a</sup>

| Samples | EGCg 2       | ECg 3          | EGC 4       | EC 5         | GCg 6           | Cg 7            | GC 8           | C 9            |
|---------|--------------|----------------|-------------|--------------|-----------------|-----------------|----------------|----------------|
| A       | 416 $\pm$ 10 | 71.0 $\pm$ 2.0 | 538 $\pm$ 8 | 174 $\pm$ 7  | 9.09 $\pm$ 0.28 | ND <sup>b</sup> | 28.6 $\pm$ 1.5 | 16.3 $\pm$ 1.0 |
| B       | 505 $\pm$ 10 | 96.6 $\pm$ 1.9 | 749 $\pm$ 5 | 230 $\pm$ 7  | 13.6 $\pm$ 0.1  | ND <sup>b</sup> | 54.0 $\pm$ 2.1 | 27.0 $\pm$ 0.7 |
| C       | 458 $\pm$ 3  | 88.2 $\pm$ 1.1 | 624 $\pm$ 2 | 220 $\pm$ 5  | 12.7 $\pm$ 0.1  | ND <sup>b</sup> | 43.0 $\pm$ 0.9 | 23.9 $\pm$ 1.3 |
| D       | 568 $\pm$ 2  | 98.8 $\pm$ 2.8 | 801 $\pm$ 5 | 251 $\pm$ 1  | 12.6 $\pm$ 0.4  | ND <sup>b</sup> | 55.1 $\pm$ 2.1 | 27.1 $\pm$ 0.8 |
| E       | 681 $\pm$ 17 | 131 $\pm$ 5    | 758 $\pm$ 7 | 289 $\pm$ 13 | 10.0 $\pm$ 1.0  | ND <sup>b</sup> | 48.3 $\pm$ 2.2 | 30.2 $\pm$ 1.0 |
| F       | 842 $\pm$ 11 | 164 $\pm$ 1    | 752 $\pm$ 7 | 299 $\pm$ 4  | 19.2 $\pm$ 0.0  | ND <sup>b</sup> | 57.7 $\pm$ 0.3 | 32.8 $\pm$ 1.6 |
| G       | 718 $\pm$ 2  | 142 $\pm$ 3    | 773 $\pm$ 3 | 281 $\pm$ 7  | 17.8 $\pm$ 0.2  | ND <sup>b</sup> | 56.7 $\pm$ 1.4 | 31.7 $\pm$ 0.4 |
| H       | 644 $\pm$ 5  | 123 $\pm$ 1    | 753 $\pm$ 4 | 264 $\pm$ 8  | 19.7 $\pm$ 0.5  | ND <sup>b</sup> | 61.5 $\pm$ 0.6 | 30.1 $\pm$ 1.2 |
| I       | 771 $\pm$ 13 | 131 $\pm$ 3    | 639 $\pm$ 2 | 223 $\pm$ 9  | 14.9 $\pm$ 0.3  | ND <sup>b</sup> | 42.7 $\pm$ 1.8 | 26.3 $\pm$ 1.1 |

<sup>a</sup>Means and standard divisions (n = 3). <sup>b</sup>Not detected.

### HPLC analysis of catechin concentrations of green tea infusions.

The analysis was conducted according to the procedure reported by Mizukami et al.<sup>R1</sup> However, on advice from the original author, the following conditions were changed: HPLC column, Cadenza CD-C18 column (4.6 mm $\times$ 150 mm, 3  $\mu\text{m}$ ; Imtakt, Kyoto, Japan); guard column, Cadenza CD-C18 (2.0 mm $\times$ 5.0 mm, 3  $\mu\text{m}$ ; Imtakt, Kyoto, Japan); mobile phase, (A) 0.2% phosphoric acid aqueous solution, (B) methanol/acetonitrile (3:2 v/v).<sup>R2,R3</sup> A gradient was established as follows: 0–15 min, 15% B; 15–25 min, linear gradient of B from 15 to 50%; and 25–30 min, 50% B. The HPLC system was consisted of a binary pump to generate gradients (G1312A; Agilent Technologies, Santa Clara, CA, USA), temperature-controlled column chamber (CO-8020; TOSOH, Tokyo, Japan), and UV-vis detector (SPD-10Avp; Shimadzu, Kyoto, Japan). The flow rate was 1.0 mL/min, and the injection volume was 10  $\mu\text{L}$ . UV detection was performed at 210 nm. Under these conditions, GC, EGC, C, internal standard substance (catechol), EGCg, EC, GCg, ECg, and Cg were eluted at 3.5, 5.8, 7.1, 7.7, 13.1, 13.8, 18.9, 22.1, and 22.8 min, respectively.

### References

- (R1) Y. Mizukami, Y. Sawai and Y. Yamaguchi, *J. Agric. Food Chem.*, 2007, **55**, 4957–4964.
- (R2) Y. Mizukami, *Tea Res. J.*, 2019, **127**, 19–25, and a reference therein.
- (R3) H. Hirono, S. Goto, S. Aiba, *Nippon Shokuhin Kagaku Kogaku Kaishi*, 2020, **67**, 264–270.

**Cartesian coordinates, number of imaginary frequencies, and energies**  
(M06-2X/6-31G(d) level)

(1) Complexes of sensor molecule **1** and EGCg **2**

**1: EGCg 2 = 1:1 complex**

Number of imaginary frequency = 0

Sum of electronic and zero-point Energies = -6805.071796 au

Sum of electronic and thermal Energies = -6804.961564 au

Sum of electronic and thermal Enthalpies = -6804.960620 au

Sum of electronic and thermal Free Energies = -6805.223521 au

|   |             |             |             |
|---|-------------|-------------|-------------|
| O | -3.76848400 | -2.74551200 | -2.06862000 |
| H | -4.50789800 | -2.97175700 | -1.44499400 |
| C | -2.59374100 | -3.31501600 | -1.66997900 |
| C | -2.57227700 | -4.52170000 | -0.95849700 |
| O | -3.72872500 | -5.21424100 | -0.74975000 |
| H | -3.62036900 | -5.87051900 | -0.02156500 |
| C | -1.34861600 | -5.02512400 | -0.50821900 |
| O | -1.42567700 | -6.18464600 | 0.21352700  |
| H | -0.66429100 | -6.24228300 | 0.81309500  |
| C | -0.15560400 | -4.38160900 | -0.81606800 |
| H | 0.78634900  | -4.79811400 | -0.46072800 |
| C | -0.17897500 | -3.21522100 | -1.58286800 |
| C | 1.11885200  | -2.48000700 | -1.80796800 |
| H | 1.96771400  | -3.18120400 | -1.82799600 |
| C | 2.09875100  | -0.92965000 | -3.30730100 |
| C | 2.31515500  | -0.58827100 | -4.64387100 |
| H | 1.68396900  | -0.99067900 | -5.42613000 |
| C | 3.37307200  | 0.26233800  | -4.94719600 |
| C | 4.21408100  | 0.76925200  | -3.95448900 |
| H | 5.05034500  | 1.42149800  | -4.19474400 |
| C | 3.97170500  | 0.41751600  | -2.62499900 |
| C | 2.90437500  | -0.42937200 | -2.28646200 |
| C | 1.38432800  | -1.50638300 | -0.66048700 |
| H | 1.34767800  | -2.04007100 | 0.29283700  |
| C | -0.09402100 | -0.00248000 | 0.42418400  |
| C | -1.21740000 | 0.92622000  | 0.23739400  |
| C | -1.69055000 | 1.67008200  | 1.32233700  |
| H | -1.24647800 | 1.56826000  | 2.30683900  |
| C | -1.81978400 | 1.05015200  | -1.01559200 |
| H | -1.47718300 | 0.47027200  | -1.86472300 |
| C | 2.70924600  | -0.80284800 | -0.84777600 |
| H | 2.76091900  | 0.07952600  | -0.20275200 |
| H | 3.51689500  | -1.47531500 | -0.53743700 |

|   |             |             |             |
|---|-------------|-------------|-------------|
| O | 1.05817900  | -1.78376500 | -3.04883900 |
| O | 3.56367000  | 0.57103400  | -6.26518600 |
| H | 4.33736400  | 1.14760200  | -6.33471400 |
| O | 4.71117700  | 0.85302900  | -1.59734500 |
| H | 5.48838000  | 1.39841900  | -1.89910000 |
| C | -1.39540800 | -2.68067700 | -1.99984400 |
| H | -1.43373100 | -1.77120600 | -2.59028000 |
| O | 0.31267400  | -0.55331700 | -0.71353100 |
| O | 0.44517800  | -0.26211600 | 1.49713000  |
| C | -2.87715400 | 1.92932000  | -1.18489200 |
| O | -3.42920000 | 2.03870800  | -2.43538400 |
| H | -4.42878300 | 2.01897500  | -2.42175900 |
| C | -3.33530700 | 2.72264700  | -0.11999400 |
| O | -4.34726500 | 3.59747200  | -0.21859300 |
| H | -4.49200600 | 3.93208700  | -1.15698700 |
| C | -2.74455400 | 2.55846200  | 1.15371000  |
| O | -3.15677700 | 3.28829700  | 2.20863300  |
| H | -4.08010800 | 3.61398000  | 2.10005100  |
| C | 0.32460400  | -6.03354200 | 3.25962800  |
| C | 0.58570700  | -4.75647200 | 2.75349800  |
| C | -0.46664400 | -3.88130100 | 2.50348300  |
| C | -1.77556100 | -4.26877700 | 2.78380500  |
| C | -2.03588800 | -5.53723700 | 3.30240600  |
| C | -0.98294200 | -6.41684900 | 3.54334500  |
| H | 1.15956200  | -6.70880900 | 3.41851100  |
| H | -0.27880600 | -2.91697600 | 2.03969100  |
| H | -3.05839300 | -5.84404800 | 3.49312000  |
| H | -1.18598900 | -7.40466100 | 3.94312600  |
| C | 2.00390100  | -4.39967000 | 2.41912900  |
| O | 2.79223500  | -5.26830000 | 2.07593500  |
| N | 2.29474800  | -3.06701800 | 2.52870000  |
| H | 1.58686800  | -2.47194100 | 2.96143500  |
| C | -2.90215500 | -3.34231100 | 2.46453700  |
| O | -3.99479900 | -3.76531700 | 2.06502400  |
| N | -2.63165300 | -2.03220400 | 2.64865500  |
| H | -1.78336500 | -1.78426700 | 3.16569900  |
| C | 3.46553600  | -2.40985900 | 2.09795600  |
| C | 3.56113300  | -1.05060600 | 2.31441700  |
| C | 4.50645000  | -3.08754500 | 1.40721500  |
| C | 4.65761400  | -0.30964900 | 1.81338100  |
| H | 2.75733500  | -0.52627600 | 2.82565400  |
| C | 5.57480000  | -2.38348300 | 0.91443800  |
| H | 4.43748700  | -4.15401400 | 1.25674000  |
| C | 4.72454200  | 1.10501200  | 1.97013500  |
| C | 5.67547000  | -0.97938300 | 1.07540600  |



|   |             |             |             |
|---|-------------|-------------|-------------|
| H | 6.35927600  | -2.91291400 | 0.38489800  |
| C | 5.78669900  | 1.79321000  | 1.45796700  |
| H | 3.92307400  | 1.64068800  | 2.47087000  |
| C | 6.72999600  | -0.20086400 | 0.51409800  |
| C | 6.81403500  | 1.14088800  | 0.74119300  |
| H | 7.63584400  | 1.71298700  | 0.32782800  |
| C | -3.57193000 | -1.00811600 | 2.35652500  |
| C | -4.11345900 | -0.90998000 | 1.10246000  |
| C | -3.93569100 | -0.09134400 | 3.37028700  |
| C | -5.09662400 | 0.07246900  | 0.83234300  |
| H | -3.78130200 | -1.56771600 | 0.30322200  |
| C | -4.86185300 | 0.88960200  | 3.12794600  |
| H | -3.47315300 | -0.17619500 | 4.34971700  |
| C | -5.66117100 | 0.17457600  | -0.46355800 |
| C | -5.48728800 | 0.98995300  | 1.85325300  |
| H | -5.10875800 | 1.58953400  | 3.91778900  |
| C | -6.58815700 | 1.14800700  | -0.72317200 |
| H | -5.33665400 | -0.51126100 | -1.24430900 |
| C | -6.46580800 | 1.97819300  | 1.52859300  |
| C | -7.00687300 | 2.05436700  | 0.27321400  |
| H | -7.72681000 | 2.82975600  | 0.03728200  |
| S | 5.89835300  | 3.56628500  | 1.55030700  |
| S | 7.88217100  | -0.91570300 | -0.65298800 |
| S | -7.11418300 | 1.37503900  | -2.40880200 |
| S | -6.93619900 | 3.24849200  | 2.71018400  |
| O | 8.63675800  | 0.24675900  | -1.20375000 |
| O | 8.72132500  | -1.87342900 | 0.08829000  |
| O | 4.59317400  | 4.04313000  | 2.04398200  |
| O | 6.20437000  | 3.97752800  | 0.15014100  |
| O | -7.40823100 | 2.52578500  | 3.91422100  |
| O | -7.96309800 | 4.05768600  | 2.04680300  |
| O | -7.52697300 | 0.05470300  | -2.92387300 |
| O | -5.88912500 | 1.88779800  | -3.08729200 |
| O | -8.20341000 | 2.37644300  | -2.40083200 |
| O | -5.65993200 | 3.98065700  | 2.96477000  |
| O | 7.02712100  | 3.86373600  | 2.46760300  |
| O | 7.03173300  | -1.55227700 | -1.69128000 |
| O | 10.44854800 | -2.92763200 | -2.07235000 |
| H | 10.01804800 | -2.37298400 | -2.74873900 |
| H | 9.96664700  | -2.69269200 | -1.26199500 |
| O | -7.43338300 | 2.25191100  | -5.57927500 |
| H | -6.78194100 | 1.51294800  | -5.50786600 |
| H | -8.09076400 | 2.02867900  | -4.90205400 |
| O | -6.01025900 | -0.13694400 | -5.30183600 |
| H | -6.58301800 | -0.28067600 | -4.52487300 |

|   |             |             |             |
|---|-------------|-------------|-------------|
| H | -5.11694100 | -0.14259700 | -4.89695200 |
| O | -0.00534600 | -1.28415600 | 3.86827700  |
| H | 0.11067000  | -0.64447400 | 3.13190600  |
| H | 0.09609600  | -0.78567200 | 4.69061000  |
| O | 6.28475100  | 6.81540600  | 0.05288700  |
| H | 6.17763300  | 5.86494100  | -0.14039000 |
| H | 5.62196500  | 6.96789200  | 0.77020100  |
| O | -5.26271300 | 3.10942200  | 5.66506500  |
| H | -4.99157900 | 3.58485500  | 4.86047500  |
| H | -6.15098300 | 2.82857000  | 5.37838100  |
| O | 8.96248600  | -1.08668900 | -3.72351700 |
| H | 8.11583500  | -1.40921400 | -3.36325400 |
| H | 9.15582700  | -0.37851500 | -3.08470600 |
| O | -6.99365400 | 4.45910300  | -3.89131000 |
| H | -6.91984400 | 3.76321400  | -4.58267000 |
| H | -7.49435000 | 3.97154200  | -3.20960300 |
| O | -5.63771800 | -3.36774600 | -0.19240100 |
| H | -5.21689600 | -4.24783300 | -0.21411800 |
| H | -5.34197900 | -3.01506300 | 0.66556600  |
| O | -4.43321700 | -6.42860200 | 1.53874700  |
| H | -5.38110200 | -6.57505400 | 1.41288900  |
| H | -4.35236700 | -5.49486600 | 1.83245300  |
| O | 4.62970700  | -3.03703300 | -2.20245100 |
| H | 4.24915900  | -2.32320900 | -2.73588400 |
| H | 5.43916900  | -2.62318100 | -1.84939300 |
| O | 6.85556800  | 2.30822100  | -2.13646000 |
| H | 6.74844200  | 2.91613400  | -1.37647400 |
| H | 7.54730900  | 1.66435200  | -1.87766200 |
| O | -3.57141600 | -0.45005300 | -3.86163100 |
| H | -3.47962900 | 0.37211400  | -3.34657000 |
| H | -3.73141100 | -1.16154800 | -3.21670300 |
| O | -4.57943600 | 4.58485100  | -2.66541000 |
| H | -5.47234000 | 4.52964900  | -3.10450600 |
| H | -4.04398700 | 3.91305900  | -3.11501100 |
| O | 8.40034500  | 6.27501900  | 1.69093800  |
| H | 7.72842300  | 6.57756800  | 1.03128900  |
| H | 8.20873600  | 5.32212500  | 1.76408500  |
| O | 4.60467900  | 6.87030400  | 2.20633600  |
| H | 5.31114500  | 6.81637200  | 2.89374200  |
| H | 4.34392900  | 5.93444300  | 2.11640200  |
| O | 6.72864400  | 6.33965700  | 3.85122000  |
| H | 6.63114100  | 5.37710500  | 3.73426400  |
| H | 7.42446700  | 6.52684200  | 3.17706800  |

1: EGCg 2 = 1:2 complex

Number of imaginary frequency = 0

Sum of electronic and zero-point Energies = -8633.508846 au

Sum of electronic and thermal Energies = -8633.364510 au

Sum of electronic and thermal Enthalpies = -8633.363566 au

Sum of electronic and thermal Free Energies = -8633.691581 au

|   |             |            |             |
|---|-------------|------------|-------------|
| O | -1.62590000 | 2.50110000 | -2.99310000 |
| H | -0.79570000 | 2.15280000 | -3.36530000 |
| C | -1.30080000 | 3.63760000 | -2.32620000 |
| C | 0.05200000  | 4.01220000 | -2.26040000 |
| O | 0.91730000  | 3.22520000 | -2.97500000 |
| H | 1.72930000  | 2.96470000 | -2.48520000 |
| C | 0.39100000  | 5.18290000 | -1.57300000 |
| O | 1.66080000  | 5.61740000 | -1.37780000 |
| H | 2.33670000  | 4.94210000 | -1.63850000 |
| C | -0.61830000 | 5.95890000 | -1.00050000 |
| H | -0.32050000 | 6.86930000 | -0.48620000 |
| C | -1.95160000 | 5.57880000 | -1.08250000 |
| C | -2.96210000 | 6.44310000 | -0.37620000 |
| H | -2.67050000 | 7.50060000 | -0.47610000 |
| C | -5.29000000 | 6.86470000 | -0.35790000 |
| C | -6.45450000 | 6.98230000 | -1.12080000 |
| H | -6.46000000 | 6.60580000 | -2.13880000 |
| C | -7.56490000 | 7.59040000 | -0.55100000 |
| C | -7.52600000 | 8.08380000 | 0.75340000  |
| H | -8.40290000 | 8.56130000 | 1.17420000  |
| C | -6.35430000 | 7.94600000 | 1.49280000  |
| C | -5.21470000 | 7.32780000 | 0.95340000  |
| C | -3.04510000 | 6.13730000 | 1.12550000  |
| H | -2.04650000 | 6.14310000 | 1.57020000  |
| C | -2.84250000 | 3.77760000 | 1.50200000  |
| C | -3.62970000 | 2.51960000 | 1.46830000  |
| C | -4.85910000 | 2.50440000 | 0.80530000  |
| H | -5.24930000 | 3.39350000 | 0.32480000  |
| C | -3.12030000 | 1.38770000 | 2.11060000  |
| H | -2.17050000 | 1.42560000 | 2.63270000  |
| C | -3.98020000 | 7.13160000 | 1.79480000  |
| H | -4.25460000 | 6.76810000 | 2.78970000  |
| H | -3.44960000 | 8.08050000 | 1.94310000  |
| O | -4.23430000 | 6.25780000 | -0.97700000 |
| O | -8.73550000 | 7.74650000 | -1.23210000 |
| H | -8.63690000 | 7.36140000 | -2.11430000 |
| O | -6.24420000 | 8.38880000 | 2.76490000  |
| H | -7.09480000 | 8.77760000 | 3.05840000  |

|   |             |             |             |
|---|-------------|-------------|-------------|
| C | -2.30550000 | 4.39740000  | -1.73050000 |
| H | -3.33810000 | 4.07520000  | -1.79810000 |
| O | -3.62710000 | 4.84150000  | 1.26170000  |
| O | -1.65370000 | 3.85800000  | 1.74200000  |
| C | -3.85780000 | 0.20350000  | 2.07180000  |
| O | -3.41170000 | -0.90590000 | 2.70850000  |
| H | -3.98110000 | -1.71110000 | 2.55640000  |
| C | -5.07980000 | 0.18120000  | 1.39000000  |
| O | -5.79010000 | -0.98870000 | 1.35420000  |
| H | -6.00750000 | -1.16410000 | 0.39420000  |
| C | -5.59830000 | 1.32660000  | 0.77260000  |
| O | -6.79910000 | 1.31640000  | 0.15860000  |
| H | -7.25810000 | 0.45530000  | 0.26730000  |
| O | -4.29690000 | -1.70420000 | -3.76540000 |
| H | -4.86090000 | -0.96740000 | -3.44770000 |
| C | -3.08840000 | -1.74720000 | -3.16280000 |
| C | -2.22210000 | -2.76760000 | -3.57860000 |
| O | -2.61180000 | -3.60810000 | -4.56670000 |
| H | -2.06680000 | -4.42120000 | -4.50310000 |
| C | -0.97720000 | -2.90880000 | -2.95480000 |
| O | -0.18410000 | -3.90440000 | -3.46830000 |
| H | 0.19940000  | -4.48220000 | -2.78260000 |
| C | -0.58580000 | -2.04990000 | -1.93200000 |
| H | 0.37700000  | -2.19540000 | -1.45440000 |
| C | -1.43800000 | -1.01090000 | -1.54040000 |
| C | -1.03790000 | -0.01030000 | -0.48160000 |
| H | -1.83560000 | 0.74150000  | -0.38520000 |
| C | -0.25850000 | -0.07140000 | 1.78890000  |
| C | -0.34060000 | -0.73280000 | 3.01160000  |
| H | -0.96550000 | -1.61180000 | 3.08150000  |
| C | 0.28730000  | -0.19320000 | 4.13310000  |
| C | 1.06130000  | 0.96440000  | 4.00030000  |
| H | 1.55070000  | 1.40220000  | 4.86300000  |
| C | 1.11480000  | 1.62610000  | 2.76910000  |
| C | 0.44620000  | 1.13070000  | 1.63670000  |
| C | 0.24870000  | 0.75430000  | -0.78100000 |
| H | 0.21060000  | 1.18490000  | -1.78110000 |
| C | 2.44460000  | 0.07050000  | -1.38100000 |
| C | 3.55670000  | -0.80680000 | -0.94500000 |
| C | 3.43370000  | -1.61580000 | 0.18800000  |
| H | 2.49830000  | -1.65680000 | 0.73870000  |
| C | 4.77150000  | -0.70310000 | -1.61670000 |
| H | 4.86200000  | -0.04270000 | -2.47310000 |
| C | 0.49150000  | 1.80910000  | 0.29020000  |
| H | 1.46050000  | 2.29430000  | 0.10680000  |

|   |             |             |             |
|---|-------------|-------------|-------------|
| H | -0.27700000 | 2.58890000  | 0.21030000  |
| O | -0.90490000 | -0.69690000 | 0.76560000  |
| O | 0.17220000  | -0.76130000 | 5.35480000  |
| H | -0.61650000 | -1.35920000 | 5.34160000  |
| O | 1.91250000  | 2.72030000  | 2.70570000  |
| H | 1.55260000  | 3.42850000  | 2.11030000  |
| C | -2.68400000 | -0.86890000 | -2.15560000 |
| H | -3.36700000 | -0.08410000 | -1.83650000 |
| O | 1.32010000  | -0.19200000 | -0.70140000 |
| O | 2.53730000  | 0.93530000  | -2.22510000 |
| C | 5.87620000  | -1.40720000 | -1.16060000 |
| O | 7.07290000  | -1.29910000 | -1.83220000 |
| H | 7.78230000  | -1.01920000 | -1.18370000 |
| C | 5.77150000  | -2.23030000 | -0.02940000 |
| O | 6.78370000  | -2.94180000 | 0.51500000  |
| H | 7.57730000  | -3.01010000 | -0.07550000 |
| C | 4.54010000  | -2.31390000 | 0.64180000  |
| O | 4.44290000  | -3.08540000 | 1.76180000  |
| H | 5.34560000  | -3.35400000 | 2.00800000  |
| C | 2.67330000  | -3.43760000 | 6.26710000  |
| C | 2.85720000  | -2.87180000 | 5.00640000  |
| C | 1.89760000  | -3.04530000 | 4.01360000  |
| C | 0.74220000  | -3.77600000 | 4.28680000  |
| C | 0.53220000  | -4.28930000 | 5.56780000  |
| C | 1.49860000  | -4.12390000 | 6.55490000  |
| H | 3.45390000  | -3.32150000 | 7.01270000  |
| H | 2.06100000  | -2.59540000 | 3.03810000  |
| H | -0.38810000 | -4.82890000 | 5.76600000  |
| H | 1.33850000  | -4.53930000 | 7.54460000  |
| C | 4.13740000  | -2.15570000 | 4.69340000  |
| O | 5.21800000  | -2.61260000 | 5.03450000  |
| N | 3.96070000  | -0.99230000 | 4.00040000  |
| H | 3.00050000  | -0.67320000 | 3.88290000  |
| C | -0.30790000 | -4.04060000 | 3.25930000  |
| O | -1.46370000 | -4.31600000 | 3.59940000  |
| N | 0.07450000  | -3.98220000 | 1.96190000  |
| H | 1.06370000  | -3.91400000 | 1.75680000  |
| C | 4.89890000  | -0.34080000 | 3.18300000  |
| C | 4.41830000  | 0.61780000  | 2.32200000  |
| C | 6.27740000  | -0.67830000 | 3.15610000  |
| C | 5.25570000  | 1.19420000  | 1.34810000  |
| H | 3.36680000  | 0.88640000  | 2.32510000  |
| C | 7.11240000  | -0.11060000 | 2.22430000  |
| H | 6.66060000  | -1.40130000 | 3.86230000  |
| C | 4.70640000  | 2.09140000  | 0.39590000  |

|   |             |             |             |
|---|-------------|-------------|-------------|
| C | 6.62420000  | 0.81400000  | 1.26410000  |
| H | 8.15550000  | -0.40290000 | 2.22570000  |
| C | 5.48110000  | 2.56020000  | -0.62470000 |
| H | 3.66150000  | 2.37770000  | 0.47650000  |
| C | 7.39510000  | 1.35240000  | 0.18590000  |
| C | 6.84590000  | 2.19260000  | -0.74780000 |
| H | 7.45130000  | 2.55660000  | -1.57520000 |
| C | -0.81240000 | -4.24840000 | 0.88220000  |
| C | -2.01200000 | -3.59320000 | 0.77480000  |
| C | -0.44500000 | -5.23070000 | -0.06650000 |
| C | -2.91850000 | -3.94980000 | -0.25540000 |
| H | -2.27820000 | -2.80030000 | 1.46690000  |
| C | -1.31120000 | -5.58520000 | -1.06460000 |
| H | 0.51990000  | -5.72620000 | 0.01050000  |
| C | -4.15490000 | -3.27660000 | -0.39100000 |
| C | -2.58770000 | -4.98160000 | -1.17310000 |
| H | -1.01640000 | -6.34440000 | -1.76740000 |
| C | -5.02460000 | -3.64100000 | -1.38540000 |
| H | -4.38310000 | -2.47350000 | 0.30150000  |
| C | -3.54050000 | -5.34440000 | -2.17110000 |
| C | -4.73280000 | -4.68240000 | -2.29090000 |
| H | -5.42700000 | -4.93890000 | -3.08310000 |
| S | 4.76970000  | 3.62970000  | -1.85120000 |
| S | 9.09970000  | 0.85080000  | -0.04070000 |
| S | -6.55140000 | -2.74580000 | -1.50910000 |
| S | -3.19300000 | -6.68890000 | -3.30530000 |
| O | 8.99410000  | -0.65600000 | -0.16680000 |
| O | 9.55170000  | 1.47720000  | -1.28620000 |
| O | 5.33950000  | 4.97530000  | -1.64950000 |
| O | 3.30200000  | 3.60030000  | -1.58670000 |
| O | -4.37160000 | -6.84170000 | -4.15620000 |
| O | -2.94960000 | -7.86470000 | -2.40540000 |
| O | -6.19770000 | -1.32410000 | -1.22850000 |
| O | -7.44770000 | -3.26410000 | -0.42580000 |
| O | -7.11990000 | -2.96330000 | -2.85070000 |
| O | -1.94710000 | -6.31140000 | -4.02470000 |
| O | 5.14460000  | 3.03350000  | -3.15710000 |
| O | 9.84050000  | 1.22240000  | 1.17490000  |
| O | -4.51280000 | -3.32000000 | 2.80450000  |
| H | -4.17490000 | -4.18180000 | 2.47540000  |
| H | -5.48850000 | -3.37580000 | 2.75510000  |
| O | -8.97820000 | -0.64820000 | -2.47200000 |
| H | -8.91470000 | -0.56580000 | -1.50390000 |
| H | -8.68350000 | -1.55710000 | -2.65070000 |
| O | -8.57890000 | -0.87800000 | 0.38790000  |

|   |             |             |             |
|---|-------------|-------------|-------------|
| H | -8.25590000 | -1.78700000 | 0.19160000  |
| H | -9.11360000 | -0.96050000 | 1.18950000  |
| O | 7.97320000  | 5.53230000  | -2.46380000 |
| H | 8.36050000  | 4.64900000  | -2.62940000 |
| H | 7.14150000  | 5.34780000  | -1.98780000 |
| O | -7.30730000 | -3.02890000 | 2.37870000  |
| H | -7.29350000 | -3.37630000 | 1.46670000  |
| H | -6.98220000 | -2.11890000 | 2.25380000  |
| O | -6.59800000 | -0.36530000 | -4.01520000 |
| H | -7.23820000 | -0.15460000 | -3.30830000 |
| H | -6.68390000 | -1.33270000 | -4.06170000 |
| O | 11.29690000 | 2.60850000  | -3.30350000 |
| H | 10.44530000 | 2.92000000  | -3.66080000 |
| H | 10.99760000 | 2.16350000  | -2.49570000 |
| O | -3.46420000 | -5.88210000 | 2.30880000  |
| H | -2.64910000 | -5.51190000 | 2.69210000  |
| H | -3.17390000 | -6.34670000 | 1.50010000  |
| O | -0.39470000 | -8.60380000 | -1.56220000 |
| H | -1.19170000 | -8.52860000 | -2.12500000 |
| H | -0.75930000 | -8.34840000 | -0.69560000 |
| O | 0.82030000  | -6.48520000 | -3.09930000 |
| H | 0.62980000  | -7.24900000 | -2.51950000 |
| H | -0.00020000 | -6.40900000 | -3.62190000 |
| O | 6.65740000  | 4.81370000  | -4.81240000 |
| H | 7.04180000  | 5.34180000  | -4.07930000 |
| H | 5.96010000  | 4.29990000  | -4.36280000 |
| O | 6.94370000  | 0.92610000  | -3.71260000 |
| H | 7.03010000  | 0.23880000  | -3.02810000 |
| H | 6.21550000  | 1.51140000  | -3.42810000 |
| O | -2.57770000 | -7.83010000 | 0.31680000  |
| H | -3.06440000 | -8.60010000 | 0.64300000  |
| H | -2.87110000 | -7.72760000 | -0.61780000 |
| O | -2.22940000 | -2.05980000 | 5.12810000  |
| H | -2.20610000 | -2.94260000 | 4.71320000  |
| H | -2.67760000 | -1.50800000 | 4.45890000  |
| O | 0.99170000  | 4.84400000  | 1.41150000  |
| H | 0.04460000  | 4.68670000  | 1.24640000  |
| H | 1.37870000  | 5.11300000  | 0.55970000  |
| O | 8.96840000  | -3.22430000 | -1.10650000 |
| H | 9.44130000  | -2.41170000 | -0.84580000 |
| H | 8.48450000  | -2.94410000 | -1.90140000 |
| O | 10.31450000 | -1.35170000 | 2.33330000  |
| H | 10.40090000 | -0.39770000 | 2.15850000  |
| H | 9.79280000  | -1.61400000 | 1.55900000  |
| O | 8.57240000  | 3.14050000  | -3.76240000 |

|   |             |             |             |
|---|-------------|-------------|-------------|
| H | 8.19600000  | 2.23880000  | -3.65510000 |
| H | 7.95230000  | 3.59880000  | -4.37340000 |
| O | -8.66240000 | 9.48300000  | 3.58970000  |
| H | -8.96590000 | 10.29320000 | 3.15760000  |
| H | -9.43220000 | 8.89790000  | 3.61180000  |

**1: EGCg 2 = 1:3 complex**

Number of imaginary frequency = 0

|                                               |                  |
|-----------------------------------------------|------------------|
| Sum of electronic and zero-point Energies =   | -10232.851327 au |
| Sum of electronic and thermal Energies =      | -10232.682808 au |
| Sum of electronic and thermal Enthalpies =    | -10232.681864 au |
| Sum of electronic and thermal Free Energies = | -10233.049701 au |

|   |             |            |             |
|---|-------------|------------|-------------|
| O | 6.08975500  | 5.96356300 | -2.82397900 |
| H | 6.64239200  | 6.26198100 | -2.05453000 |
| C | 4.99234300  | 5.40487500 | -2.22992500 |
| C | 4.96450200  | 4.03581400 | -1.95067500 |
| O | 6.01569300  | 3.22556300 | -2.29290200 |
| H | 6.58332300  | 3.16725400 | -1.48543900 |
| C | 3.86177500  | 3.48557100 | -1.27171400 |
| O | 3.83950200  | 2.16708400 | -0.98454100 |
| H | 4.66117900  | 1.73881900 | -1.30647700 |
| C | 2.79850400  | 4.29992400 | -0.87436300 |
| H | 1.95437000  | 3.86320900 | -0.35111200 |
| C | 2.83024200  | 5.65764500 | -1.17498100 |
| C | 1.83047900  | 6.61647000 | -0.59064100 |
| H | 1.69533500  | 7.47456300 | -1.26697100 |
| C | -0.37990000 | 6.71598300 | 0.21544600  |
| C | -1.70406100 | 6.35033300 | -0.03015800 |
| H | -1.91321700 | 5.53492200 | -0.71314100 |
| C | -2.73150800 | 7.04993200 | 0.59901000  |
| C | -2.43065500 | 8.13379500 | 1.43431400  |
| H | -3.24282600 | 8.67490700 | 1.91083000  |
| C | -1.10453700 | 8.48057800 | 1.64463000  |
| C | -0.04637900 | 7.77969500 | 1.05423300  |
| C | 2.35640400  | 7.16055400 | 0.75068600  |
| H | 3.34888100  | 7.59340200 | 0.60470500  |
| C | 3.64260600  | 5.43535100 | 1.79624200  |
| C | 3.53991900  | 4.23153500 | 2.65197700  |
| C | 4.69578800  | 3.48358000 | 2.86278800  |
| H | 5.64491400  | 3.80398600 | 2.44630500  |
| C | 2.33168300  | 3.83150100 | 3.23265300  |
| H | 1.42259900  | 4.40340000 | 3.07310700  |
| C | 1.38111500  | 8.17545200 | 1.32706900  |



|   |             |             |             |
|---|-------------|-------------|-------------|
| H | 1.55772300  | 8.27899000  | 2.40262300  |
| H | 1.59354200  | 9.15705700  | 0.88451500  |
| O | 0.58341000  | 5.97167900  | -0.41024600 |
| O | -4.03681800 | 6.76167100  | 0.41950500  |
| H | -4.16305400 | 5.86025100  | 0.04290700  |
| O | -0.74716100 | 9.52484900  | 2.45119500  |
| H | -1.54983800 | 9.92177900  | 2.81770900  |
| C | 3.90973200  | 6.20729700  | -1.86644600 |
| H | 3.97454900  | 7.27767200  | -2.05403600 |
| O | 2.46082000  | 6.06328100  | 1.66593800  |
| O | 4.67761000  | 5.81865900  | 1.28150800  |
| C | 2.28613300  | 2.68005000  | 4.00929200  |
| O | 1.14078300  | 2.24464400  | 4.59935200  |
| H | 0.44556100  | 2.14883100  | 3.91389500  |
| C | 3.45500000  | 1.92788000  | 4.24404200  |
| O | 3.33386000  | 0.86949100  | 5.07103100  |
| H | 4.07310300  | 0.23951700  | 4.98534000  |
| C | 4.65695100  | 2.33190000  | 3.63664300  |
| O | 5.83508300  | 1.65461600  | 3.81954300  |
| H | 5.68265500  | 0.70460300  | 4.00537600  |
| O | 0.71842700  | 6.13200000  | -3.66962400 |
| H | 1.33172000  | 6.61055700  | -4.25270800 |
| C | 1.13573500  | 4.83675400  | -3.65946300 |
| C | 2.33140300  | 4.50290200  | -4.28870400 |
| O | 3.10722000  | 5.49142000  | -4.88419300 |
| H | 3.65844300  | 5.87323000  | -4.17084400 |
| C | 2.79085500  | 3.18931700  | -4.25623200 |
| O | 3.98625700  | 2.88083500  | -4.84568400 |
| H | 4.37735500  | 3.71771600  | -5.15129400 |
| C | 2.09297500  | 2.21869600  | -3.55639900 |
| H | 2.52039500  | 1.22814300  | -3.45838200 |
| C | 0.94234300  | 2.58331100  | -2.84922900 |
| C | 0.43453500  | 1.61067000  | -1.79584200 |
| H | 1.30972900  | 1.34625300  | -1.20118600 |
| C | -1.77753700 | 2.29435100  | -1.27764300 |
| C | -2.58619600 | 3.11460300  | -0.49138100 |
| H | -2.17413700 | 3.59786900  | 0.38710100  |
| C | -3.90647100 | 3.30228300  | -0.88200500 |
| C | -4.43639900 | 2.64433800  | -1.98540300 |
| H | -5.48615800 | 2.77662900  | -2.20953700 |
| C | -3.62374200 | 1.78151200  | -2.71971600 |
| C | -2.26975600 | 1.60595800  | -2.38997000 |
| C | -0.21382800 | 0.32103500  | -2.29695200 |
| H | -0.53535900 | -0.24521700 | -1.41535400 |
| C | 0.69613200  | -1.74242200 | -3.02407400 |

|   |             |             |             |
|---|-------------|-------------|-------------|
| C | 1.91966100  | -2.38775900 | -3.54188900 |
| C | 3.13978900  | -1.71530600 | -3.50219200 |
| H | 3.22621300  | -0.72580600 | -3.06786300 |
| C | 1.83103300  | -3.68137600 | -4.06425800 |
| H | 0.86918000  | -4.18104700 | -4.09557900 |
| C | -1.40728800 | 0.64442700  | -3.17031900 |
| H | -1.05977000 | 1.08506500  | -4.11423900 |
| H | -1.97820900 | -0.25797700 | -3.41115900 |
| O | -0.46431800 | 2.22501600  | -0.88748900 |
| O | -4.72694100 | 4.16550300  | -0.19378300 |
| H | -4.71031800 | 3.87417800  | 0.75789900  |
| O | -4.08770800 | 1.07104500  | -3.77019700 |
| H | -5.05502300 | 1.23151100  | -3.87188000 |
| C | 0.43004500  | 3.87621200  | -2.93842000 |
| H | -0.42520700 | 4.19096300  | -2.35219400 |
| O | 0.81206200  | -0.41323600 | -2.96502900 |
| O | -0.32087800 | -2.33065900 | -2.69210000 |
| C | 2.97812600  | -4.33296000 | -4.52320000 |
| O | 2.96687900  | -5.55874000 | -5.08581600 |
| H | 2.03993800  | -5.85633900 | -5.16920500 |
| C | 4.22916400  | -3.69792000 | -4.40541600 |
| O | 5.35111200  | -4.35554300 | -4.76374500 |
| H | 6.08260200  | -4.06322600 | -4.16340100 |
| C | 4.27964700  | -2.35805400 | -3.98399800 |
| O | 5.49165400  | -1.76746700 | -4.03777500 |
| H | 5.42483500  | -0.82355700 | -3.73961700 |
| O | 0.55545200  | -1.75376900 | 5.42716000  |
| H | 1.30292700  | -1.43034200 | 4.89178500  |
| C | -0.03929400 | -2.84248700 | 4.83578100  |
| C | 0.64946400  | -4.05640500 | 4.75501300  |
| O | 1.92585200  | -4.20246700 | 5.23514000  |
| H | 2.38215400  | -3.33550600 | 5.16997500  |
| C | 0.03680900  | -5.17523400 | 4.16863000  |
| O | 0.67391300  | -6.35149900 | 4.00799100  |
| H | 1.67218500  | -6.27887300 | 4.01706600  |
| C | -1.28969600 | -5.07423900 | 3.75588000  |
| H | -1.74530700 | -5.95433600 | 3.30884300  |
| C | -1.99092200 | -3.87452800 | 3.87267600  |
| C | -3.37658100 | -3.80057000 | 3.27603700  |
| H | -3.98293500 | -4.66227600 | 3.60181900  |
| C | -5.23281300 | -2.34195100 | 3.14131800  |
| C | -6.06145200 | -1.45900400 | 3.83234300  |
| H | -5.70819700 | -0.95971500 | 4.72450000  |
| C | -7.32707000 | -1.18901200 | 3.31920800  |
| C | -7.76983900 | -1.82146400 | 2.15654900  |

|   |             |             |             |
|---|-------------|-------------|-------------|
| H | -8.75822900 | -1.62310200 | 1.76157700  |
| C | -6.89896600 | -2.65214900 | 1.45723400  |
| C | -5.61386000 | -2.92860200 | 1.93274900  |
| C | -3.29655500 | -3.84811300 | 1.74421200  |
| H | -2.75900200 | -4.74152600 | 1.42258600  |
| C | -1.27495000 | -2.89378900 | 0.92779600  |
| C | -0.44414300 | -1.67460600 | 1.03559600  |
| C | 0.79315300  | -1.63568400 | 0.38481500  |
| H | 1.13712900  | -2.47483500 | -0.20998300 |
| C | -0.91566700 | -0.58263000 | 1.77553300  |
| H | -1.86041900 | -0.63540500 | 2.30335700  |
| C | -4.68585900 | -3.79955400 | 1.13179800  |
| H | -4.62822500 | -3.44551700 | 0.09649600  |
| H | -5.07552500 | -4.82461400 | 1.08239500  |
| O | -4.00631800 | -2.60288000 | 3.69908100  |
| O | -8.13338300 | -0.31013000 | 3.98141900  |
| H | -9.02841800 | -0.32704300 | 3.56608700  |
| O | -7.25568600 | -3.23712100 | 0.28520600  |
| H | -7.95614600 | -2.69059900 | -0.12637900 |
| C | -1.36131500 | -2.75155800 | 4.39967800  |
| H | -1.87781000 | -1.80159700 | 4.46987200  |
| O | -2.52868100 | -2.69679300 | 1.36885600  |
| O | -0.90074200 | -3.95657500 | 0.46365100  |
| C | -0.16020600 | 0.58084500  | 1.80629600  |
| O | -0.53627100 | 1.74037500  | 2.42893700  |
| H | -1.52019700 | 1.71249900  | 2.59111900  |
| C | 1.06859900  | 0.63042200  | 1.15027800  |
| O | 1.79739000  | 1.77031900  | 1.09921600  |
| H | 1.24032000  | 2.49806400  | 1.42734000  |
| C | 1.55691700  | -0.47592400 | 0.44812900  |
| O | 2.72623700  | -0.37497400 | -0.22954700 |
| H | 3.06323400  | 0.54340100  | -0.16499900 |
| C | -0.21472800 | -7.43259800 | -3.53489300 |
| C | -0.05784600 | -6.31515800 | -2.71715300 |
| C | -1.06355300 | -5.34595800 | -2.65547200 |
| C | -2.22021100 | -5.48262900 | -3.42491700 |
| C | -2.38688900 | -6.62651200 | -4.21396500 |
| C | -1.38983600 | -7.59862600 | -4.26658700 |
| H | 0.59626600  | -8.15191400 | -3.59339600 |
| H | -0.91673300 | -4.47350600 | -2.02706000 |
| H | -3.30971700 | -6.73172400 | -4.77517100 |
| H | -1.52083600 | -8.47527500 | -4.89292000 |
| C | 1.25153200  | -6.12481000 | -1.99368100 |
| O | 2.29221200  | -6.58900800 | -2.42744900 |
| N | 1.14759500  | -5.40265300 | -0.84460300 |

|   |             |             |             |
|---|-------------|-------------|-------------|
| H | 0.22590700  | -5.16708700 | -0.48693300 |
| C | -3.36712100 | -4.49872000 | -3.38534000 |
| O | -4.47852800 | -4.84699600 | -3.75626900 |
| N | -3.06844600 | -3.25638500 | -2.90289100 |
| H | -2.09347800 | -3.03542100 | -2.71252100 |
| C | 2.18543200  | -4.77001800 | -0.13090100 |
| C | 3.21372600  | -4.08540900 | -0.74705600 |
| C | 2.04391200  | -4.73035000 | 1.27802600  |
| C | 4.03380600  | -3.21636800 | 0.01894600  |
| H | 3.34377700  | -4.13640200 | -1.82470100 |
| C | 2.84826500  | -3.92459600 | 2.03818600  |
| H | 1.28025000  | -5.34194200 | 1.75115700  |
| C | 5.02029400  | -2.40371800 | -0.61333300 |
| C | 3.81652800  | -3.09188500 | 1.42234300  |
| H | 2.73303500  | -3.94078400 | 3.11354800  |
| C | 5.68032000  | -1.44932100 | 0.10701600  |
| H | 5.25144000  | -2.55045400 | -1.66465200 |
| C | 4.58064500  | -2.11259400 | 2.13129500  |
| C | 5.46551200  | -1.28982500 | 1.49566800  |
| H | 6.03918900  | -0.55460900 | 2.05021800  |
| C | -3.99724100 | -2.32226100 | -2.39243600 |
| C | -3.56879000 | -1.46445800 | -1.40262000 |
| C | -5.34770800 | -2.26708100 | -2.82381600 |
| C | -4.48510400 | -0.63069900 | -0.72000500 |
| H | -2.52809200 | -1.47439900 | -1.08162700 |
| C | -6.24565900 | -1.43539300 | -2.20178900 |
| H | -5.67394200 | -2.91145700 | -3.62735200 |
| C | -4.05641700 | 0.13116400  | 0.39965000  |
| C | -5.85768200 | -0.62598800 | -1.09977900 |
| H | -7.27216200 | -1.44772900 | -2.55829500 |
| C | -4.95923200 | 0.83723000  | 1.14632200  |
| H | -3.00551600 | 0.12433700  | 0.66924100  |
| C | -6.75536000 | 0.14783700  | -0.29780300 |
| C | -6.33180400 | 0.85072400  | 0.80178800  |
| H | -7.04349300 | 1.38252600  | 1.42448700  |
| S | 6.89901900  | -0.37797800 | -0.62890200 |
| S | 4.57203600  | -2.10384800 | 3.90818800  |
| S | -4.40933600 | 1.75643600  | 2.58609500  |
| S | -8.50492100 | 0.13536900  | -0.65298700 |
| O | 5.39521200  | -0.94630900 | 4.35088000  |
| O | 3.17998400  | -1.98156200 | 4.39341600  |
| O | 7.15640000  | -0.85827600 | -1.99421700 |
| O | 8.07243300  | -0.49985500 | 0.28239200  |
| O | -8.97149800 | -1.27356800 | -0.68361600 |
| O | -8.66088100 | 0.77485500  | -1.99083900 |

|   |              |             |             |
|---|--------------|-------------|-------------|
| O | -5.38746800  | 1.49463900  | 3.65562900  |
| O | -4.37968000  | 3.19254200  | 2.20560200  |
| O | -3.05877700  | 1.22691300  | 2.89848000  |
| O | -9.16930100  | 0.92804100  | 0.41167200  |
| O | 6.31886800   | 0.98686600  | -0.59067800 |
| O | 5.19518200   | -3.40522200 | 4.27227000  |
| O | 4.30679600   | -5.37308600 | 6.08773000  |
| H | 3.36384800   | -5.14294600 | 6.14974500  |
| H | 4.68889500   | -4.60798500 | 5.61821400  |
| O | 7.25339500   | -3.56336100 | -2.91803600 |
| H | 7.51316100   | -3.71063900 | -1.98493800 |
| H | 7.09895100   | -2.60253400 | -2.95131500 |
| O | -6.80546000  | 1.53212300  | -3.89615700 |
| H | -7.11917100  | 0.89540000  | -3.22468500 |
| H | -6.99374900  | 2.38658600  | -3.44240500 |
| O | -8.19304000  | 3.58679000  | 0.63020800  |
| H | -8.76162700  | 2.81138500  | 0.48770200  |
| H | -7.89853200  | 3.43661500  | 1.55098600  |
| O | 7.92190300   | 1.91604200  | 1.82513400  |
| H | 8.00738500   | 1.08705900  | 1.31019400  |
| H | 7.22597100   | 1.75480300  | 2.48842500  |
| O | -7.75561000  | 3.42702300  | -2.11540000 |
| H | -8.35460000  | 2.68057900  | -1.93792800 |
| H | -7.46245900  | 3.67857100  | -1.21471300 |
| O | -9.46948200  | 0.81817300  | -4.65811200 |
| H | -8.53675800  | 1.09366200  | -4.73501100 |
| H | -9.64703400  | 0.99583100  | -3.71999400 |
| O | 6.90598900   | 3.78251800  | 0.20250700  |
| H | 5.97167900   | 3.84788500  | 0.46157600  |
| H | 7.29241400   | 3.04734300  | 0.75934400  |
| O | -10.48201000 | -0.06479300 | 2.60716300  |
| H | -10.91143500 | -0.88252900 | 2.32088100  |
| H | -10.09075500 | 0.30627600  | 1.78482700  |
| O | -9.28922100  | -1.86610200 | -3.59155200 |
| H | -9.37364400  | -1.65184300 | -2.64812000 |
| H | -9.33358700  | -1.00034400 | -4.04054400 |
| O | -7.82923000  | 2.62649400  | 3.28001200  |
| H | -8.15926100  | 1.71957600  | 3.40610400  |
| H | -6.88527900  | 2.49542900  | 3.50627000  |
| O | 6.64919000   | -4.42945900 | 2.09861700  |
| H | 7.47754000   | -4.80772100 | 2.42561200  |
| H | 6.20460100   | -4.04134600 | 2.88439100  |
| O | 8.11179100   | -3.46666300 | -0.17777100 |
| H | 8.34975100   | -2.52916200 | -0.05871600 |
| H | 7.41331900   | -3.61696200 | 0.48549900  |

|   |             |             |             |
|---|-------------|-------------|-------------|
| O | 3.27798900  | -6.64333700 | 3.83158800  |
| H | 3.81244600  | -6.24712000 | 4.54940800  |
| H | 3.77102100  | -6.51237900 | 2.99233600  |
| O | 0.36559500  | -5.66443100 | -6.07067000 |
| H | -0.44016600 | -5.76091500 | -5.53890600 |
| H | 0.44189500  | -4.71464200 | -6.24480000 |
| O | 5.13846000  | 0.76626500  | -3.26227700 |
| H | 4.92526100  | 1.53685600  | -3.82125800 |
| H | 5.90678700  | 1.04026800  | -2.73211400 |
| O | 7.01894300  | 6.46068000  | -0.34925200 |
| H | 7.23577100  | 5.54048700  | -0.08361600 |
| H | 6.15460300  | 6.58681800  | 0.07949500  |
| O | 4.78501600  | -6.41536600 | 1.47416300  |
| H | 4.20711900  | -6.06000600 | 0.78151100  |
| H | 5.45660200  | -5.71647900 | 1.61514600  |

**1: EGCg 2 = 1:4 complex**

Number of imaginary frequency = 0

Sum of electronic and zero-point Energies = -11984.859804 au

Sum of electronic and thermal Energies = -11984.658080 au

Sum of electronic and thermal Enthalpies = -11984.657136 au

Sum of electronic and thermal Free Energies = -11985.101641 au

|   |              |             |             |
|---|--------------|-------------|-------------|
| O | -4.39310400  | -1.65208400 | 1.83497500  |
| H | -4.79014800  | -0.85580700 | 1.41623400  |
| C | -5.25170800  | -2.70621000 | 1.62635300  |
| C | -4.71067000  | -3.91076000 | 1.17535500  |
| O | -3.39913900  | -4.10344200 | 0.87274800  |
| H | -2.79007400  | -3.54483900 | 1.40205700  |
| C | -5.57640500  | -4.97869800 | 0.89392700  |
| O | -5.09094600  | -6.12212500 | 0.35686800  |
| H | -4.20906500  | -5.94938200 | -0.03670200 |
| C | -6.94262900  | -4.85473100 | 1.13069700  |
| H | -7.58228300  | -5.70468900 | 0.90713400  |
| C | -7.46907000  | -3.64968900 | 1.59825400  |
| C | -8.96514100  | -3.51693000 | 1.75417500  |
| H | -9.38843200  | -4.49466700 | 2.03469600  |
| C | -10.54193000 | -2.20513200 | 2.95715900  |
| C | -10.82371900 | -1.52970400 | 4.13921400  |
| H | -10.03675000 | -1.34422700 | 4.85976000  |
| C | -12.12900900 | -1.10758300 | 4.38762300  |
| C | -13.14529100 | -1.36863900 | 3.46464000  |
| H | -14.16746800 | -1.05696700 | 3.65006300  |
| C | -12.83006300 | -2.04125200 | 2.29016800  |

|   |              |             |             |
|---|--------------|-------------|-------------|
| C | -11.52811500 | -2.46813300 | 1.99723600  |
| C | -9.67764200  | -3.08840600 | 0.46727400  |
| H | -9.38184900  | -3.73031100 | -0.36631500 |
| C | -9.36387700  | -1.29667500 | -1.05907700 |
| C | -8.87184000  | 0.10378300  | -1.17074800 |
| C | -8.46492900  | 0.56240700  | -2.42336100 |
| H | -8.57172200  | -0.06366100 | -3.30196200 |
| C | -8.73219300  | 0.89348900  | -0.02866100 |
| H | -9.06351700  | 0.52174900  | 0.93628800  |
| C | -11.18554500 | -3.12508800 | 0.68169500  |
| H | -11.65623500 | -2.60963200 | -0.16627100 |
| H | -11.51587400 | -4.17280400 | 0.64404000  |
| O | -9.23809600  | -2.57990600 | 2.78478400  |
| O | -12.36560900 | -0.45693600 | 5.54763400  |
| H | -13.31516700 | -0.22136200 | 5.60367900  |
| O | -13.85670400 | -2.26115000 | 1.41877800  |
| H | -13.54250900 | -2.79277000 | 0.67459600  |
| C | -6.62293700  | -2.57317300 | 1.84657200  |
| H | -7.02213900  | -1.62517900 | 2.19209100  |
| O | -9.26212500  | -1.74621600 | 0.20741100  |
| O | -9.74587400  | -1.98221600 | -1.98048700 |
| C | -8.16684600  | 2.15749300  | -0.14261300 |
| O | -8.04713900  | 3.02165400  | 0.89751200  |
| H | -8.18273100  | 2.54055300  | 1.72602600  |
| C | -7.67403600  | 2.59558600  | -1.37753900 |
| O | -7.00772700  | 3.78453400  | -1.49655300 |
| H | -6.34078900  | 3.78667300  | -0.76356300 |
| C | -7.85646300  | 1.81075300  | -2.52054400 |
| O | -7.40760500  | 2.25085900  | -3.72533700 |
| H | -7.01551000  | 3.13264700  | -3.59660800 |
| O | 10.75839400  | 3.59624500  | 1.78012100  |
| H | 11.49603800  | 3.37605700  | 2.37592700  |
| C | 10.40812900  | 2.43421400  | 1.17508700  |
| C | 11.10541500  | 1.26769100  | 1.51714600  |
| O | 12.05685200  | 1.39689200  | 2.48924800  |
| H | 12.84187700  | 0.83081400  | 2.28843600  |
| C | 10.75243400  | 0.07703200  | 0.88864500  |
| O | 11.44974900  | -1.06210000 | 1.23904300  |
| H | 11.03429000  | -1.81847500 | 0.79935900  |
| C | 9.74384100   | 0.04530600  | -0.07126000 |
| H | 9.50936200   | -0.89212200 | -0.56839900 |
| C | 9.04522700   | 1.20832800  | -0.38968900 |
| C | 7.92350900   | 1.18213100  | -1.41332900 |
| H | 8.00261900   | 2.06653400  | -2.05587700 |
| C | 7.48610300   | -1.12335500 | -1.92366900 |

|   |            |             |             |
|---|------------|-------------|-------------|
| C | 7.85180100 | -2.21460900 | -2.70530800 |
| H | 8.48438800 | -2.07904200 | -3.57345600 |
| C | 7.28663600 | -3.45697000 | -2.43492100 |
| C | 6.41654900 | -3.62074000 | -1.34947300 |
| H | 5.99453500 | -4.59568900 | -1.13526800 |
| C | 6.09091000 | -2.51531100 | -0.56847800 |
| C | 6.61576200 | -1.24467200 | -0.84101500 |
| C | 6.52223000 | 1.19878000  | -0.77719100 |
| H | 5.79047900 | 1.29760500  | -1.58078300 |
| C | 5.91957200 | 3.46952000  | -0.38973400 |
| C | 5.83892300 | 4.52890500  | 0.64601900  |
| C | 5.05986400 | 5.66374200  | 0.37528000  |
| H | 4.53442800 | 5.74587000  | -0.57076600 |
| C | 6.52468200 | 4.37637500  | 1.85769200  |
| H | 7.13937600 | 3.50601800  | 2.05823400  |
| C | 6.25490400 | -0.06222500 | 0.01187000  |
| H | 6.83600500 | -0.04993300 | 0.94315100  |
| H | 5.19955700 | -0.10639900 | 0.30272600  |
| O | 8.04383800 | 0.07641200  | -2.29230000 |
| O | 7.61386500 | -4.48254400 | -3.25491000 |
| H | 7.03697100 | -5.25677600 | -3.06794300 |
| O | 5.25773200 | -2.58376300 | 0.50247200  |
| H | 5.00878100 | -3.49809200 | 0.73282700  |
| C | 9.38645500 | 2.40993800  | 0.23425800  |
| H | 8.87344400 | 3.33786700  | 0.00119800  |
| O | 6.41787500 | 2.31859000  | 0.10505700  |
| O | 5.59140000 | 3.60556300  | -1.55261000 |
| C | 6.42933400 | 5.38054900  | 2.81248100  |
| O | 7.08324600 | 5.27717400  | 4.00139500  |
| H | 6.80594000 | 6.03464000  | 4.54168900  |
| C | 5.64815600 | 6.50162700  | 2.55419800  |
| O | 5.55662600 | 7.45463100  | 3.52322200  |
| H | 4.89362400 | 8.09060000  | 3.19766100  |
| C | 4.94539600 | 6.65018800  | 1.35237800  |
| O | 4.23974800 | 7.80017500  | 1.29449400  |
| H | 3.50264400 | 7.84814100  | 0.61579800  |
| O | 3.09378600 | 2.88797300  | 5.02975800  |
| H | 3.07002700 | 3.48571900  | 4.23508800  |
| C | 1.82949700 | 2.50250000  | 5.34515800  |
| C | 1.64370700 | 1.67615600  | 6.45581200  |
| O | 2.63330200 | 1.23961300  | 7.28436500  |
| H | 3.49858300 | 1.13064300  | 6.79224400  |
| C | 0.34331800 | 1.28379000  | 6.80395500  |
| O | 0.18934800 | 0.48400900  | 7.89654600  |
| H | 1.09461900 | 0.30894700  | 8.21038000  |



|   |             |             |             |
|---|-------------|-------------|-------------|
| C | -0.75806100 | 1.69460000  | 6.06675800  |
| H | -1.74614800 | 1.34821900  | 6.35629900  |
| C | -0.55861600 | 2.49901800  | 4.94312100  |
| C | -1.72859000 | 2.81970500  | 4.04211500  |
| H | -2.59592600 | 3.16122100  | 4.63149900  |
| C | -2.22902900 | 4.23157200  | 2.21755400  |
| C | -2.06897200 | 5.51313400  | 1.69793300  |
| H | -1.21360200 | 6.10858300  | 2.00125200  |
| C | -2.99657500 | 5.98561100  | 0.77733300  |
| C | -4.08314200 | 5.19494800  | 0.39494500  |
| H | -4.77847200 | 5.56568300  | -0.35118700 |
| C | -4.17633500 | 3.89926900  | 0.88496900  |
| C | -3.25093000 | 3.37739200  | 1.80074600  |
| C | -2.17342800 | 1.59913400  | 3.22311100  |
| H | -2.46605700 | 0.78522700  | 3.88791700  |
| C | -0.29710000 | 0.19379200  | 3.06252700  |
| C | 1.15341800  | 0.26720300  | 2.77987900  |
| C | 1.70957000  | 1.22762700  | 1.93073500  |
| H | 1.08268900  | 1.89925400  | 1.35476800  |
| C | 1.96988000  | -0.56492300 | 3.54363700  |
| H | 1.51489200  | -1.29448400 | 4.20247100  |
| C | -3.32477400 | 1.95171100  | 2.28726100  |
| H | -3.29991000 | 1.24069200  | 1.45098100  |
| H | -4.27289700 | 1.77818900  | 2.81454500  |
| O | -1.32503900 | 3.85892500  | 3.16530400  |
| O | -2.87653600 | 7.22433100  | 0.24211100  |
| H | -1.97077100 | 7.56315100  | 0.42529300  |
| O | -5.23492200 | 3.14077800  | 0.45863000  |
| H | -5.02957200 | 2.17981500  | 0.39506900  |
| C | 0.72422100  | 2.90224000  | 4.58840200  |
| H | 0.88342100  | 3.50647500  | 3.70245000  |
| O | -1.02103100 | 1.18131400  | 2.47545500  |
| O | -0.80460200 | -0.62162400 | 3.80595500  |
| C | 3.35187000  | -0.42102000 | 3.50780900  |
| O | 4.19260200  | -1.17210800 | 4.27556000  |
| H | 3.72208200  | -2.00574800 | 4.52420500  |
| C | 3.91515600  | 0.57985000  | 2.71395300  |
| O | 5.24770100  | 0.82164300  | 2.76883700  |
| H | 5.45354200  | 1.48952800  | 2.08512100  |
| C | 3.09048600  | 1.35780700  | 1.88935200  |
| O | 3.77377000  | 2.23785300  | 1.10683900  |
| H | 3.16385800  | 2.80886600  | 0.56422300  |
| O | -2.21076900 | -0.89503600 | 0.39115700  |
| H | -2.65580300 | -1.36199100 | 1.12835800  |
| C | -0.90001500 | -1.25364800 | 0.32525200  |

|   |             |             |             |
|---|-------------|-------------|-------------|
| C | -0.39972000 | -2.25043400 | 1.16579700  |
| O | -1.26447200 | -2.86942800 | 2.02484600  |
| H | -0.80398400 | -3.03754400 | 2.89709800  |
| C | 0.96072400  | -2.57308400 | 1.10991000  |
| O | 1.41831800  | -3.52342700 | 1.96715300  |
| H | 2.36786300  | -3.67792600 | 1.79041200  |
| C | 1.80257800  | -1.89847700 | 0.23946600  |
| H | 2.86943000  | -2.12098400 | 0.23566400  |
| C | 1.29037900  | -0.91134000 | -0.60007500 |
| C | 2.30061700  | -0.22065300 | -1.47160300 |
| H | 3.16316200  | 0.05115300  | -0.83953300 |
| C | 3.77983000  | -0.80242900 | -3.20585400 |
| C | 4.47244300  | -1.82531000 | -3.83443300 |
| H | 4.18816200  | -2.85835200 | -3.66638700 |
| C | 5.55722900  | -1.49409900 | -4.63609800 |
| C | 5.96449400  | -0.15986000 | -4.75876600 |
| H | 6.87556400  | 0.09014200  | -5.28927200 |
| C | 5.24924400  | 0.83574200  | -4.10104000 |
| C | 4.08569000  | 0.54920600  | -3.36707000 |
| C | 1.91177400  | 1.05231400  | -2.21161100 |
| H | 1.45654500  | 1.79010700  | -1.54463000 |
| C | 0.08395300  | 1.61674900  | -3.63952800 |
| C | -1.15243300 | 1.04089500  | -4.24776900 |
| C | -2.09545800 | 1.93059700  | -4.78319500 |
| H | -1.89938100 | 2.99973900  | -4.77155400 |
| C | -1.38641600 | -0.33784400 | -4.20284000 |
| H | -0.64201600 | -1.02860800 | -3.82215800 |
| C | 3.18469700  | 1.63751400  | -2.81970500 |
| H | 2.91514200  | 2.35910000  | -3.59843900 |
| H | 3.66518100  | 2.22197700  | -2.02308900 |
| O | 2.73615600  | -1.19796400 | -2.41345700 |
| O | 6.27430600  | -2.45547900 | -5.27210400 |
| H | 6.01050200  | -3.32663900 | -4.91462400 |
| O | 5.70857000  | 2.12200100  | -4.18409700 |
| H | 5.43815200  | 2.61995500  | -3.38949000 |
| C | -0.06419600 | -0.60416700 | -0.58524300 |
| H | -0.48575800 | 0.13628900  | -1.25532000 |
| O | 0.93266700  | 0.65793900  | -3.19935400 |
| O | 0.29843500  | 2.79859700  | -3.51658000 |
| C | -2.58151600 | -0.82682800 | -4.71718300 |
| O | -2.84120100 | -2.17287800 | -4.71357800 |
| H | -3.77136100 | -2.29852000 | -4.96904500 |
| C | -3.54300200 | 0.04822400  | -5.21024100 |
| O | -4.72873800 | -0.46631300 | -5.63420000 |
| H | -5.30625700 | 0.29943100  | -5.81318900 |

|   |             |             |             |
|---|-------------|-------------|-------------|
| C | -3.30866000 | 1.43224100  | -5.25327200 |
| O | -4.35460700 | 2.12192200  | -5.74429300 |
| H | -4.32992400 | 3.12863500  | -5.65347200 |
| C | -6.23243400 | -2.10505300 | -1.35970000 |
| C | -4.92801800 | -1.61399600 | -1.36355400 |
| C | -3.87204200 | -2.43445500 | -1.74249200 |
| C | -4.12386500 | -3.76914400 | -2.06833200 |
| C | -5.43070700 | -4.25067200 | -2.10104700 |
| C | -6.49056400 | -3.40455600 | -1.77742700 |
| H | -7.01752600 | -1.45534500 | -0.99907700 |
| H | -2.85118300 | -2.06450700 | -1.68679600 |
| H | -5.60415700 | -5.29855100 | -2.32689500 |
| H | -7.51361300 | -3.76564500 | -1.81398000 |
| C | -4.68260800 | -0.19129200 | -0.97781400 |
| O | -5.17472800 | 0.33148400  | 0.04026900  |
| N | -3.91994200 | 0.46498300  | -1.85418800 |
| H | -3.60125700 | -0.04143500 | -2.67485500 |
| C | -2.96075200 | -4.70279100 | -2.16099200 |
| O | -2.98080000 | -5.80668900 | -1.61595000 |
| N | -1.88366400 | -4.20326300 | -2.82334600 |
| H | -2.04293600 | -3.40230900 | -3.43327600 |
| C | -3.49050600 | 1.81939100  | -1.76560500 |
| C | -2.35488800 | 2.14540400  | -1.07665000 |
| C | -4.17047900 | 2.77951600  | -2.54516700 |
| C | -1.77286300 | 3.42410300  | -1.26215100 |
| H | -1.86990800 | 1.41470000  | -0.43452900 |
| C | -3.64236600 | 4.02948900  | -2.70502100 |
| H | -5.07674500 | 2.47894700  | -3.06221000 |
| C | -0.51252700 | 3.71306500  | -0.69880000 |
| C | -2.39232900 | 4.36633900  | -2.12421400 |
| H | -4.15410200 | 4.74062200  | -3.32977900 |
| C | 0.12597600  | 4.87648400  | -1.02332800 |
| H | -0.03422500 | 2.96996400  | -0.06711900 |
| C | -1.71592200 | 5.59044200  | -2.38605500 |
| C | -0.47570300 | 5.84142500  | -1.85991200 |
| H | 0.05423300  | 6.75169600  | -2.12040300 |
| C | -0.55667300 | -4.64425200 | -2.64477200 |
| C | -0.12216500 | -5.05578300 | -1.40980800 |
| C | 0.34940200  | -4.56778000 | -3.73129600 |
| C | 1.22729800  | -5.42207400 | -1.22490800 |
| H | -0.80132500 | -5.07837300 | -0.56262100 |
| C | 1.66970400  | -4.91483900 | -3.57060900 |
| H | 0.00571100  | -4.18188900 | -4.68575200 |
| C | 1.68345500  | -5.75763400 | 0.07346300  |
| C | 2.14321200  | -5.37974100 | -2.31323900 |

|   |              |             |             |
|---|--------------|-------------|-------------|
| H | 2.35006500   | -4.82757300 | -4.41062700 |
| C | 3.00582700   | -6.03545100 | 0.27164700  |
| H | 0.99365400   | -5.72351700 | 0.90948500  |
| C | 3.48394500   | -5.81411500 | -2.07282800 |
| C | 3.91278000   | -6.12946100 | -0.81055700 |
| H | 4.92891300   | -6.47377500 | -0.64618600 |
| S | 1.80315600   | 5.09596900  | -0.48377700 |
| S | -2.43395300  | 6.76360200  | -3.53085600 |
| S | 3.63279500   | -6.00824200 | 1.92889300  |
| S | 4.58348200   | -6.15920500 | -3.44849600 |
| O | -2.51583300  | 6.04704800  | -4.82507100 |
| O | -3.76832400  | 7.11238600  | -2.97354300 |
| O | 2.34241800   | 3.70903100  | -0.44688200 |
| O | 1.78701000   | 5.74263400  | 0.84856100  |
| O | 4.71406400   | -4.93496800 | -4.26346800 |
| O | 3.88124300   | -7.25795300 | -4.16384900 |
| O | 2.51106500   | -6.33947300 | 2.83957700  |
| O | 4.04324500   | -4.56736600 | 2.09108400  |
| O | 4.77410200   | -6.93181800 | 2.01644200  |
| O | 5.86239400   | -6.57874700 | -2.82745700 |
| O | 2.43515800   | 5.92674000  | -1.53260900 |
| O | -1.50897200  | 7.91648700  | -3.57082400 |
| O | -0.47394000  | 8.56029800  | 0.29839800  |
| H | -0.49706400  | 9.20908000  | 1.01640500  |
| H | -1.01004800  | 8.97886700  | -0.43625400 |
| O | -15.06275400 | 0.19346100  | 5.66470900  |
| H | -15.56202000 | -0.19481000 | 6.39633000  |
| H | -15.26829500 | 1.13826000  | 5.68500900  |
| O | 2.90713500   | -3.56106300 | 4.41666000  |
| H | 1.96781300   | -3.42348300 | 4.16281000  |
| H | 3.35229600   | -3.85674400 | 3.59306600  |
| O | 3.25581300   | 4.42216200  | 2.86601900  |
| H | 2.64870200   | 4.91184300  | 2.27217600  |
| H | 3.83325300   | 3.92270900  | 2.26326300  |
| O | 2.34649500   | 8.40544100  | -0.44352000 |
| H | 2.37762800   | 7.62239200  | -1.03224300 |
| H | 1.45222900   | 8.34578200  | -0.05234600 |
| O | 3.27828900   | -5.96392800 | 5.87267700  |
| H | 3.09029600   | -6.79196100 | 5.37281000  |
| H | 3.19270800   | -5.21182900 | 5.25172800  |
| O | 1.99787700   | -6.92892300 | -6.25831800 |
| H | 2.83101800   | -6.84501200 | -5.75976200 |
| H | 1.62241300   | -7.73437900 | -5.87269200 |
| O | 4.88309900   | 0.98345700  | 5.92763500  |
| H | 4.85141800   | 0.15800200  | 5.40590900  |

|   |             |             |             |
|---|-------------|-------------|-------------|
| H | 4.62813700  | 1.68138500  | 5.29634200  |
| O | 14.02942800 | -0.31966300 | 1.79245400  |
| H | 13.32809700 | -0.88772300 | 1.42246400  |
| H | 14.35511100 | -0.79651600 | 2.56850200  |
| O | 0.59518100  | -5.66565000 | 4.97539600  |
| H | 1.03733500  | -5.81605900 | 4.11871800  |
| H | 1.32749300  | -5.75470500 | 5.61459400  |
| O | -0.85380500 | -8.02711700 | -1.47953500 |
| H | -1.46484900 | -7.29277400 | -1.65035500 |
| H | -0.19472500 | -7.98138700 | -2.19483500 |
| O | -4.68235200 | 4.67568200  | -5.71694500 |
| H | -3.90147500 | 5.22844100  | -5.48492800 |
| H | -5.36580200 | 4.95453900  | -5.07283600 |
| O | 1.07897100  | -7.97441300 | -3.76599400 |
| H | 2.04167800  | -7.90232600 | -3.61414900 |
| H | 0.87262800  | -7.09492800 | -4.12340700 |
| O | 0.02527800  | -3.16139800 | 4.33535900  |
| H | -0.35899200 | -2.45220100 | 4.87259600  |
| H | 0.01767500  | -4.03477300 | 4.79817000  |
| O | -2.30113600 | 9.39586100  | -1.43093800 |
| H | -2.97443800 | 8.72732100  | -1.20525700 |
| H | -2.01131700 | 9.08864400  | -2.31751300 |
| O | 1.23763900  | -1.95479800 | -4.69053400 |
| H | 1.60330100  | -2.21361400 | -3.82883000 |
| H | 1.38222100  | -0.99577100 | -4.67201500 |
| O | -6.21178200 | 5.74901000  | -3.59875300 |
| H | -6.47233200 | 5.27372800  | -2.79169800 |
| H | -5.44552100 | 6.30680500  | -3.34107600 |
| O | 5.64728900  | -7.22351600 | 4.73414500  |
| H | 5.10154600  | -6.58491400 | 5.23075800  |
| H | 5.56482200  | -6.95822800 | 3.79941800  |
| O | 3.15544200  | -8.43356500 | 4.60096000  |
| H | 2.87327300  | -8.04625500 | 3.75453000  |
| H | 4.12940500  | -8.31839100 | 4.59194500  |

## (2) Complexes of sensor molecule **1** and EGC **4**

### **1**: EGC **4** = 1:1 complex

Number of imaginary frequency = 0

Sum of electronic and zero-point Energies = -6693.556871 au

Sum of electronic and thermal Energies = -6693.439081 au

Sum of electronic and thermal Enthalpies = -6693.438137 au

Sum of electronic and thermal Free Energies = -6693.716302 au

|   |             |             |             |
|---|-------------|-------------|-------------|
| C | 5.14268800  | -1.34973900 | -1.92622400 |
| C | 4.34011500  | -2.35146200 | -1.37525900 |
| C | 3.00991700  | -2.11206200 | -1.00162800 |
| C | 2.54089700  | -0.80765300 | -1.16759500 |
| C | 3.30444000  | 0.20651900  | -1.73548000 |
| C | 4.61418200  | -0.06957000 | -2.12099200 |
| H | 6.16462800  | -1.57629800 | -2.21449100 |
| H | 2.90469300  | 1.21070900  | -1.82996200 |
| O | 1.28685900  | -0.42965200 | -0.75839600 |
| C | 0.35925200  | -1.43047900 | -0.31685500 |
| H | -0.08175500 | -1.92361900 | -1.19487700 |
| C | -0.74757500 | -0.72149300 | 0.42651900  |
| C | -1.88679900 | -1.44680000 | 0.76634700  |
| C | -0.69740000 | 0.64586300  | 0.69530400  |
| C | -2.98902900 | -0.81582300 | 1.34339100  |
| H | -1.95694100 | -2.50194400 | 0.51966500  |
| C | -1.80287700 | 1.27417200  | 1.25897900  |
| H | 0.18325000  | 1.22556600  | 0.44077300  |
| C | -2.96038500 | 0.56120900  | 1.58555100  |
| C | 2.12000500  | -3.17522800 | -0.40493900 |
| H | 2.70800500  | -3.89641500 | 0.16969100  |
| H | 1.59236200  | -3.73529200 | -1.18796200 |
| O | 1.68295500  | -1.93155700 | 1.63580300  |
| C | 1.08201500  | -2.50800400 | 0.49329500  |
| H | 0.32906100  | -3.24119700 | 0.80858100  |
| H | 2.64988700  | -2.03884900 | 1.54490300  |
| O | 4.82556600  | -3.60979800 | -1.21892600 |
| H | 5.81668000  | -3.57258800 | -1.14953600 |
| O | 5.33260900  | 0.94001900  | -2.65878500 |
| H | 6.18819200  | 0.59048400  | -3.01182600 |
| O | -4.13157700 | -1.48830400 | 1.65731600  |
| H | -4.18497400 | -2.27332400 | 1.07152200  |
| O | -3.98619300 | 1.28656900  | 2.09251500  |
| H | -4.84158800 | 0.77229700  | 2.13364100  |
| O | -1.78815600 | 2.62550500  | 1.46412000  |
| H | -2.70322700 | 2.87268000  | 1.69248400  |
| C | -1.22263300 | 6.30600200  | -0.98196600 |
| C | -1.18553500 | 4.91589200  | -0.87695100 |
| C | 0.01713800  | 4.27636400  | -0.59330500 |
| C | 1.18639900  | 5.01679000  | -0.43577900 |
| C | 1.15748900  | 6.40262100  | -0.59658600 |
| C | -0.04852900 | 7.04554600  | -0.85924300 |
| H | -2.17675400 | 6.79036500  | -1.16437200 |
| H | 0.03419500  | 3.19640900  | -0.51345100 |
| H | 2.08579600  | 6.95721100  | -0.50174000 |

|   |             |             |             |
|---|-------------|-------------|-------------|
| H | -0.07530800 | 8.12561500  | -0.96337700 |
| C | -2.46588100 | 4.14207400  | -0.99355600 |
| O | -3.51693300 | 4.63161600  | -0.59530100 |
| N | -2.34725300 | 2.91093000  | -1.57008800 |
| H | -1.41494400 | 2.60632500  | -1.85812500 |
| C | 2.49647300  | 4.35191400  | -0.13228900 |
| O | 3.56092000  | 4.83249900  | -0.48525600 |
| N | 2.37665200  | 3.18058600  | 0.57176400  |
| H | 1.45906300  | 2.97048700  | 0.94513000  |
| C | -3.31563500 | 1.89276500  | -1.54117000 |
| C | -4.63271800 | 2.09740000  | -1.20377300 |
| C | -2.87100700 | 0.57585600  | -1.84562900 |
| C | -5.50319800 | 0.99061100  | -1.06324200 |
| H | -5.03439900 | 3.08343400  | -1.02824000 |
| C | -3.69893700 | -0.50554800 | -1.70216900 |
| H | -1.83238800 | 0.42998500  | -2.12989700 |
| C | -6.84641700 | 1.22411700  | -0.67289600 |
| C | -5.04547500 | -0.33913600 | -1.27465100 |
| H | -3.28366600 | -1.49553700 | -1.84863500 |
| C | -7.69282100 | 0.16518200  | -0.49518200 |
| H | -7.17181400 | 2.24798800  | -0.49889800 |
| C | -5.96405900 | -1.40647900 | -1.03136600 |
| C | -7.26069400 | -1.17274500 | -0.65654600 |
| H | -7.93747800 | -2.00191400 | -0.47666700 |
| C | 3.37669800  | 2.24175600  | 0.87569800  |
| C | 4.65245300  | 2.27808400  | 0.35702700  |
| C | 2.99229200  | 1.18166200  | 1.73798300  |
| C | 5.54707600  | 1.21410200  | 0.62833700  |
| H | 4.96162400  | 3.08190300  | -0.29704300 |
| C | 3.85375700  | 0.16345500  | 2.03618800  |
| H | 1.98854500  | 1.16324000  | 2.15630700  |
| C | 6.84223800  | 1.20650300  | 0.04040700  |
| C | 5.14356500  | 0.12044600  | 1.44790100  |
| H | 3.54198700  | -0.59338100 | 2.74713900  |
| C | 7.69477100  | 0.16997900  | 0.30215800  |
| H | 7.13971000  | 2.01695300  | -0.61790100 |
| C | 6.05237000  | -0.96219000 | 1.63011300  |
| C | 7.31313400  | -0.92385700 | 1.10832200  |
| H | 8.01297300  | -1.72612500 | 1.31984200  |
| S | -9.31578700 | 0.46434500  | 0.14747500  |
| S | -5.45630600 | -3.10879400 | -1.23405700 |
| S | 9.28688600  | 0.03659300  | -0.45840200 |
| S | 5.59871300  | -2.46109000 | 2.49661200  |
| O | -5.24989700 | -3.28573700 | -2.70134100 |
| O | -4.18695800 | -3.25457500 | -0.47345700 |

|   |              |             |             |
|---|--------------|-------------|-------------|
| O | -9.13292300  | 0.36188200  | 1.63909700  |
| O | -10.20111500 | -0.59232500 | -0.37724800 |
| O | 5.52488500   | -2.10598500 | 3.93501000  |
| O | 6.65890800   | -3.43329800 | 2.16582100  |
| O | 9.13032500   | -1.10824800 | -1.41600500 |
| O | 10.24872300  | -0.26027300 | 0.61839900  |
| O | 9.53659300   | 1.32058600  | -1.15938900 |
| O | 4.27351000   | -2.85992800 | 1.95826400  |
| O | -9.73681500  | 1.81206500  | -0.27965300 |
| O | -6.53881100  | -3.95148100 | -0.71069900 |
| O | 2.58917000   | -2.00341200 | 4.42022500  |
| H | 2.18655900   | -2.21334300 | 3.56093700  |
| H | 3.53541700   | -2.18884900 | 4.29292300  |
| O | -11.51565400 | -1.04802000 | 2.36922500  |
| H | -11.37452900 | -1.86761400 | 1.86222400  |
| H | -10.63985900 | -0.62291800 | 2.33970800  |
| O | 9.90231200   | 1.46837800  | -3.94879000 |
| H | 10.32447400  | 0.59310800  | -4.07714500 |
| H | 9.96361600   | 1.60779900  | -2.98556700 |
| O | 10.25964500  | -1.28968500 | -4.01442600 |
| H | 9.32604700   | -1.25251900 | -4.28499800 |
| H | 10.18339300  | -1.39370600 | -3.04759700 |
| O | 11.60687500  | 1.82485900  | 2.06178000  |
| H | 11.46799400  | 1.07010000  | 1.46157000  |
| H | 11.03873500  | 2.51510200  | 1.65661400  |
| O | -6.33052600  | 0.11711300  | 2.46616200  |
| H | -6.33106100  | -0.81858600 | 2.19162000  |
| H | -7.15284300  | 0.47896200  | 2.09622000  |
| O | -12.21506700 | 1.48680700  | 1.31351300  |
| H | -11.68413800 | 1.57819500  | 0.50505500  |
| H | -12.13214400 | 0.53977300  | 1.55772700  |
| O | 9.38775100   | 3.15243900  | 1.05833000  |
| H | 9.38827700   | 2.70308100  | 0.19397800  |
| H | 8.96317700   | 2.51006400  | 1.66358500  |
| O | -10.19915100 | 2.66493400  | 2.89406700  |
| H | -11.01292500 | 2.42072100  | 2.40051400  |
| H | -9.64428100  | 1.88645700  | 2.71496600  |
| O | 8.31603500   | -1.29328700 | 4.29982200  |
| H | 8.32045600   | -0.32876400 | 4.20010200  |
| H | 7.37827600   | -1.55209800 | 4.31963000  |
| O | -7.78770500  | -4.18446700 | -3.61351100 |
| H | -7.57423200  | -5.08701400 | -3.33671400 |
| H | -6.95898700  | -3.70738900 | -3.40769000 |
| O | 7.67889900   | -0.06052400 | -3.59079100 |
| H | 8.05203500   | -0.44520800 | -2.77216600 |



|   |              |             |             |
|---|--------------|-------------|-------------|
| H | 8.32319300   | 0.65985900  | -3.80628100 |
| O | -1.68349600  | -3.44677900 | -1.93537100 |
| H | -1.98748900  | -3.14051900 | -2.81186800 |
| H | -2.51149500  | -3.52603700 | -1.42913800 |
| O | 7.41161900   | -3.53806600 | -0.60142400 |
| H | 7.22978700   | -3.54339300 | 0.36236600  |
| H | 7.94227600   | -2.74084500 | -0.77991300 |
| O | -6.48153000  | 4.81058400  | -0.56214800 |
| H | -5.56301800  | 4.83827200  | -0.25414500 |
| H | -7.03699500  | 4.59401100  | 0.21215500  |
| O | -10.12098100 | -3.03964700 | 0.77208900  |
| H | -10.14552000 | -2.20096500 | 0.26583400  |
| H | -9.96212000  | -3.71893900 | 0.07695300  |
| O | -7.90216600  | -2.19225400 | 2.27020100  |
| H | -8.53393400  | -2.71229400 | 1.73306700  |
| H | -8.38125700  | -1.35854600 | 2.39458500  |
| O | -8.56416600  | 3.97792900  | 1.05999600  |
| H | -8.94826000  | 3.41559200  | 0.36666900  |
| H | -9.08511000  | 3.69684400  | 1.84291100  |
| O | 0.24072900   | 1.64733400  | -2.27486900 |
| H | 0.54979200   | 0.90128400  | -1.71805200 |
| H | 0.76950300   | 1.59068200  | -3.08223300 |
| O | 4.27276500   | -5.52857400 | 0.87614400  |
| H | 4.43374400   | -5.05852800 | 0.04128000  |
| H | 4.36564500   | -4.79466600 | 1.50696000  |
| O | -3.05730600  | -2.43448500 | -4.21680200 |
| H | -3.87071400  | -2.76578400 | -3.78310400 |
| H | -3.09672200  | -1.47959600 | -4.06289500 |
| O | 9.12153100   | 1.09838500  | 2.98996200  |
| H | 9.12300200   | 0.27186800  | 2.47708700  |
| H | 10.07756300  | 1.33139800  | 2.99397600  |
| O | -9.16341900  | -4.63844200 | -1.22244100 |
| H | -8.26411000  | -4.58365800 | -0.85048400 |
| H | -9.01817100  | -4.22133500 | -2.09380400 |

**1: EGC 4 = 1:2 complex**

Number of imaginary frequency = 0

Sum of electronic and zero-point Energies = -7188.449560 au

Sum of electronic and thermal Energies = -7188.330956 au

Sum of electronic and thermal Enthalpies = -7188.330012 au

Sum of electronic and thermal Free Energies = -7188.611512 au

|   |             |             |             |
|---|-------------|-------------|-------------|
| C | 0.78455800  | -3.17055700 | -2.03225400 |
| C | -0.41658300 | -2.74156300 | -1.46983900 |

|   |             |             |             |
|---|-------------|-------------|-------------|
| C | -0.88533500 | -1.42588100 | -1.64117100 |
| C | -0.09455300 | -0.57960300 | -2.43098900 |
| C | 1.09455800  | -0.98566600 | -3.01939300 |
| C | 1.53889300  | -2.29011000 | -2.81061300 |
| H | 1.12856800  | -4.17996700 | -1.83518900 |
| H | 1.68980500  | -0.28280700 | -3.58975500 |
| O | -0.41511000 | 0.74323900  | -2.62117400 |
| C | -1.73768800 | 1.16274700  | -2.32861500 |
| H | -2.42803800 | 0.74319300  | -3.07682600 |
| C | -1.75262300 | 2.67868700  | -2.40706400 |
| C | -2.96004300 | 3.38191000  | -2.29117900 |
| C | -0.55922400 | 3.37073600  | -2.61050700 |
| C | -2.95480200 | 4.77224900  | -2.39246800 |
| H | -3.90625100 | 2.86777200  | -2.13329200 |
| C | -0.55780000 | 4.76125400  | -2.66761300 |
| H | 0.38213700  | 2.84385000  | -2.70947300 |
| C | -1.75626200 | 5.45905400  | -2.58548300 |
| C | -2.17255700 | -0.92453100 | -1.02292300 |
| H | -2.28727700 | -1.30964900 | -0.00082700 |
| H | -3.04068600 | -1.28379900 | -1.58900300 |
| O | -1.19053700 | 1.02804200  | 0.02743400  |
| C | -2.14306700 | 0.59921400  | -0.96099500 |
| H | -3.10708300 | 1.01013100  | -0.65139700 |
| H | -0.37648600 | 0.52296400  | -0.15518600 |
| O | -1.10605300 | -3.67177100 | -0.76079000 |
| H | -1.96662000 | -3.35923800 | -0.41683700 |
| O | 2.69983500  | -2.65027100 | -3.39855400 |
| H | 3.09594000  | -3.42000000 | -2.93378400 |
| O | -4.06241800 | 5.57019800  | -2.29749400 |
| H | -4.56307800 | 5.31773300  | -1.48703200 |
| O | -1.71928200 | 6.82099300  | -2.64716600 |
| H | -2.62260600 | 7.12120500  | -2.44067600 |
| O | 0.61992500  | 5.43589800  | -2.76088600 |
| H | 0.41215900  | 6.38456800  | -2.72728700 |
| C | -0.19000700 | 3.47487700  | 3.29878100  |
| C | 1.11459400  | 3.94669300  | 3.38722300  |
| C | 2.22487200  | 3.10516200  | 3.25335100  |
| C | 1.98356800  | 1.75908900  | 2.97834100  |
| C | 0.68222100  | 1.26218800  | 2.85143300  |
| C | -0.38808300 | 2.13612800  | 2.97762600  |
| H | -1.02025600 | 4.16906400  | 3.35006200  |
| H | 0.53283300  | 0.21032500  | 2.62509200  |
| O | 2.98695400  | 0.86909500  | 2.77767400  |
| C | 4.27518900  | 1.41274100  | 2.45587000  |
| H | 4.23287600  | 1.86599400  | 1.45334400  |

|   |             |             |             |
|---|-------------|-------------|-------------|
| C | 5.23429300  | 0.25292300  | 2.45624500  |
| C | 5.17202700  | -0.70274000 | 3.47570300  |
| C | 6.17655500  | 0.12071000  | 1.44054000  |
| C | 6.03374900  | -1.80128200 | 3.46401700  |
| H | 4.41360200  | -0.65116000 | 4.25224400  |
| C | 7.02458200  | -0.98993200 | 1.41075000  |
| H | 6.25054100  | 0.86119100  | 0.64833200  |
| C | 6.95457200  | -1.96435400 | 2.41841100  |
| C | 3.62487400  | 3.64590400  | 3.36985400  |
| H | 3.71364800  | 4.26928300  | 4.26647100  |
| H | 3.87061400  | 4.27241800  | 2.50451100  |
| O | 4.67217900  | 2.04485500  | 4.77682300  |
| C | 4.65002700  | 2.52285400  | 3.44738000  |
| H | 5.63507100  | 2.90893600  | 3.14630000  |
| H | 5.24211600  | 1.25866000  | 4.78456800  |
| O | 1.30094000  | 5.29575000  | 3.54249200  |
| H | 1.91924200  | 5.56969700  | 2.84031000  |
| O | -1.66818800 | 1.70801200  | 2.68018300  |
| H | -1.58068900 | 1.18027600  | 1.85826600  |
| O | 5.97310500  | -2.70732600 | 4.46874500  |
| H | 5.98797600  | -3.60734400 | 4.04396000  |
| O | 7.76297400  | -3.05032400 | 2.45183900  |
| H | 8.08770200  | -3.27227100 | 1.54359700  |
| O | 7.93536300  | -1.19777400 | 0.42715300  |
| H | 7.90482000  | -0.45510000 | -0.22111600 |
| C | -2.70946400 | 6.43365600  | 0.64712000  |
| C | -2.67588100 | 5.03761500  | 0.72256600  |
| C | -1.46053100 | 4.36342800  | 0.65081200  |
| C | -0.26850400 | 5.08096100  | 0.53065800  |
| C | -0.30396700 | 6.47331600  | 0.49848900  |
| C | -1.52229300 | 7.14836400  | 0.55293200  |
| H | -3.67092400 | 6.93792000  | 0.66495700  |
| H | -1.45606900 | 3.27762200  | 0.67437800  |
| H | 0.63378400  | 7.01322100  | 0.41563700  |
| H | -1.54221300 | 8.23234000  | 0.50871800  |
| C | -3.97390100 | 4.29262700  | 0.72198900  |
| O | -4.95153100 | 4.73954800  | 0.11367800  |
| N | -3.99492100 | 3.11138200  | 1.38862300  |
| H | -3.15622200 | 2.84222600  | 1.90744600  |
| C | 1.07503000  | 4.41897700  | 0.40803900  |
| O | 2.10710700  | 5.04456300  | 0.67821100  |
| N | 1.05677700  | 3.14033000  | -0.02451500 |
| H | 0.15314900  | 2.71961800  | -0.22330600 |
| C | -4.94499100 | 2.08003200  | 1.20064100  |
| C | -4.53964900 | 0.78950300  | 1.45573600  |

|   |             |             |             |
|---|-------------|-------------|-------------|
| C | -6.26075600 | 2.30935400  | 0.71368400  |
| C | -5.35203500 | -0.30965400 | 1.10083100  |
| H | -3.55924600 | 0.59112100  | 1.87886500  |
| C | -7.08436600 | 1.25061200  | 0.41248200  |
| H | -6.60736600 | 3.32137300  | 0.56294900  |
| C | -4.83081600 | -1.62661700 | 1.17397500  |
| C | -6.64222900 | -0.09320700 | 0.54681100  |
| H | -8.07842200 | 1.46583500  | 0.03673100  |
| C | -5.54754200 | -2.67241000 | 0.67164500  |
| H | -3.83404000 | -1.79499900 | 1.56924400  |
| C | -7.38917800 | -1.23200300 | 0.11123800  |
| C | -6.85656800 | -2.49249500 | 0.15828900  |
| H | -7.42327400 | -3.34354800 | -0.20965800 |
| C | 2.17791000  | 2.35932900  | -0.40218600 |
| C | 2.17724400  | 1.01129400  | -0.13768000 |
| C | 3.25290600  | 2.92383500  | -1.12991700 |
| C | 3.22806800  | 0.17798900  | -0.58060100 |
| H | 1.40332000  | 0.57348900  | 0.48407800  |
| C | 4.29585000  | 2.13808300  | -1.55650900 |
| H | 3.23700100  | 3.98274900  | -1.36241900 |
| C | 3.20087200  | -1.21085000 | -0.28670500 |
| C | 4.31057500  | 0.73513800  | -1.31764500 |
| H | 5.10908900  | 2.58682900  | -2.11146100 |
| C | 4.20560400  | -2.01536500 | -0.73811500 |
| H | 2.36493100  | -1.63324200 | 0.26526600  |
| C | 5.33595400  | -0.15785100 | -1.77371400 |
| C | 5.28646200  | -1.49741700 | -1.49239800 |
| H | 6.08008700  | -2.15828600 | -1.83490100 |
| S | -4.77795200 | -4.27725100 | 0.58312900  |
| S | -9.02803400 | -1.00803100 | -0.58901800 |
| S | 4.13417800  | -3.76958100 | -0.44744400 |
| S | 6.83903800  | 0.43824300  | -2.56055500 |
| O | -9.50510600 | -2.37492400 | -0.90494600 |
| O | -9.81362900 | -0.33524400 | 0.46484100  |
| O | -3.32330000 | -4.00297000 | 0.75990200  |
| O | -5.13655900 | -4.80040600 | -0.74662700 |
| O | 7.70396900  | 0.83927300  | -1.42102700 |
| O | 6.47524000  | 1.55529500  | -3.44974900 |
| O | 5.37170800  | -4.11183900 | 0.29548300  |
| O | 4.12404500  | -4.38606000 | -1.80638500 |
| O | 2.89688900  | -4.02758100 | 0.30753800  |
| O | 7.37685300  | -0.72859100 | -3.30446500 |
| O | -5.33633300 | -5.08653900 | 1.69508700  |
| O | -8.82799900 | -0.17411400 | -1.79320900 |
| O | -8.78919000 | -4.90611500 | -1.94630700 |

|   |              |             |             |
|---|--------------|-------------|-------------|
| H | -8.75956500  | -3.93431800 | -1.95919800 |
| H | -9.53170000  | -5.05486000 | -1.32419600 |
| O | 6.84717100   | -5.05809300 | -2.41297600 |
| H | 5.89552900   | -4.89042300 | -2.27153600 |
| H | 7.21659300   | -5.13410300 | -1.51496200 |
| O | 8.08131300   | -4.08119500 | -0.00725000 |
| H | 8.43716600   | -3.48077800 | -0.70704300 |
| H | 7.12521300   | -3.87599900 | 0.01178600  |
| O | -10.33861300 | -4.76573600 | 0.36989100  |
| H | -9.47401100  | -5.10543000 | 0.68509200  |
| H | -10.17526700 | -3.82053200 | 0.19746400  |
| O | 3.05691500   | -3.08916700 | 2.90857900  |
| H | 2.86179600   | -3.37065800 | 1.99220200  |
| H | 3.56850100   | -2.26778100 | 2.81525400  |
| O | -7.82621700  | -5.86437200 | 0.48451900  |
| H | -6.96958600  | -5.72168700 | 0.92534900  |
| H | -7.69467500  | -5.62303100 | -0.45274900 |
| O | -2.41004900  | -6.81367600 | 0.29018600  |
| H | -2.55003700  | -6.68035700 | 1.24578900  |
| H | -2.39174800  | -5.90244800 | -0.03705100 |
| O | -8.77477700  | 0.36886400  | 3.03611900  |
| H | -9.20231700  | 0.08187800  | 2.20785400  |
| H | -8.00723100  | 0.86396300  | 2.72199200  |
| O | -3.40692100  | -3.43660500 | -2.51272700 |
| H | -4.11652900  | -3.91478300 | -2.04305100 |
| H | -2.61399100  | -3.95196400 | -2.30581900 |
| O | 7.67037300   | 0.56386700  | -5.87738400 |
| H | 7.21279800   | 1.20662100  | -5.31137700 |
| H | 7.74584100   | -0.17157800 | -5.24857500 |
| O | 5.23070100   | -4.82690200 | 3.09673300  |
| H | 5.53387900   | -4.68396200 | 2.18200500  |
| H | 4.37800300   | -4.33650500 | 3.11732600  |
| O | -2.90831800  | -5.81717800 | 2.93794200  |
| H | -3.86615900  | -5.79648100 | 2.75481400  |
| H | -2.63105100  | -5.01582400 | 2.46273200  |
| O | 4.95537700   | 4.90456400  | 0.53091100  |
| H | 3.99173400   | 4.77433000  | 0.47721100  |
| H | 5.03911800   | 5.82227000  | 0.82384600  |
| O | -9.08263200  | 2.61410600  | -1.74098100 |
| H | -8.14922900  | 2.67805200  | -1.98466300 |
| H | -9.23414500  | 1.64865000  | -1.76965700 |
| O | 8.68698400   | -2.98787400 | -2.39911300 |
| H | 8.01537700   | -3.63284000 | -2.70273800 |
| H | 8.33173400   | -2.11467100 | -2.65392000 |

1: EGC 4 = 1:3 complex

Number of imaginary frequency = 0

Sum of electronic and zero-point Energies = -8828.990549 au

Sum of electronic and thermal Energies = -8828.838954 au

Sum of electronic and thermal Enthalpies = -8828.838009 au

Sum of electronic and thermal Free Energies = -8829.184299 au

|   |             |            |             |
|---|-------------|------------|-------------|
| C | 2.79469200  | 4.98904900 | -4.33503200 |
| C | 1.45501900  | 5.26528500 | -4.58912300 |
| C | 0.66762400  | 6.00119100 | -3.69664300 |
| C | 1.26294700  | 6.40116900 | -2.49781500 |
| C | 2.59220900  | 6.09671100 | -2.19407700 |
| C | 3.34306300  | 5.36763900 | -3.11226800 |
| H | 3.38209100  | 4.41353000 | -5.04252200 |
| H | 3.00893600  | 6.37729900 | -1.23371900 |
| O | 0.57492000  | 7.06922900 | -1.51794000 |
| C | -0.84687300 | 7.16385300 | -1.60867700 |
| H | -1.10223800 | 8.06967900 | -1.04942100 |
| C | -1.54711700 | 5.98749300 | -0.94854300 |
| C | -2.87963100 | 6.12661800 | -0.55075100 |
| C | -0.88396000 | 4.77000100 | -0.75507200 |
| C | -3.56674100 | 5.04917000 | 0.01528600  |
| H | -3.40419600 | 7.06545400 | -0.69482400 |
| C | -1.59316600 | 3.69301700 | -0.22632100 |
| H | 0.17318700  | 4.67577800 | -0.99047000 |
| C | -2.93127100 | 3.81117500 | 0.14506100  |
| C | -0.78771900 | 6.26723000 | -3.96625800 |
| H | -1.39159700 | 5.36703200 | -3.78570600 |
| H | -0.94757400 | 6.53231700 | -5.01573100 |
| O | -2.66333500 | 7.61211300 | -3.16812500 |
| C | -1.28442400 | 7.39740100 | -3.07445300 |
| H | -0.78550500 | 8.32638700 | -3.38330500 |
| H | -3.10273600 | 6.72937100 | -3.23127700 |
| O | 0.84655700  | 4.77848500 | -5.70756200 |
| H | 1.32905600  | 3.96913800 | -5.96760700 |
| O | 4.60839700  | 4.99537500 | -2.76834200 |
| H | 4.84496200  | 4.20634600 | -3.29458100 |
| O | -4.85203000 | 5.20693800 | 0.42329800  |
| H | -5.16148700 | 4.41831000 | 0.92817700  |
| O | -3.55359700 | 2.73500800 | 0.70193700  |
| H | -4.32836200 | 2.49057200 | 0.13062100  |
| O | -1.07021500 | 2.43994300 | -0.03702300 |
| H | -0.10554200 | 2.43248500 | -0.15596300 |
| C | 2.72979800  | 2.71096200 | -1.04517800 |

|   |             |             |             |
|---|-------------|-------------|-------------|
| C | 1.58648700  | 2.30011600  | -1.72154600 |
| C | 1.01259200  | 1.03752000  | -1.55491100 |
| C | 1.62130700  | 0.18599900  | -0.62330000 |
| C | 2.78784500  | 0.54358000  | 0.05194500  |
| C | 3.34910600  | 1.80300200  | -0.16921500 |
| H | 3.13733300  | 3.70633400  | -1.18643100 |
| H | 3.22570800  | -0.14368200 | 0.77125500  |
| O | 1.14734500  | -1.06339900 | -0.37429900 |
| C | -0.14570900 | -1.38831300 | -0.89769500 |
| H | -0.90741300 | -0.86098500 | -0.30325600 |
| C | -0.32360800 | -2.87765100 | -0.79454300 |
| C | 0.72134000  | -3.69411300 | -1.21421800 |
| C | -1.54370300 | -3.42847700 | -0.40641200 |
| C | 0.55509800  | -5.07108000 | -1.28037400 |
| H | 1.65985200  | -3.26480100 | -1.53202600 |
| C | -1.67696200 | -4.81588500 | -0.40112300 |
| H | -2.37376100 | -2.80441200 | -0.08438100 |
| C | -0.62528500 | -5.64212700 | -0.79847400 |
| C | -0.16926700 | 0.60346200  | -2.38270400 |
| H | -0.04790200 | 0.93160600  | -3.42242800 |
| H | -1.10559000 | 1.03114200  | -2.00123000 |
| O | 0.83235500  | -1.47561800 | -3.07231600 |
| C | -0.24507700 | -0.91659800 | -2.35601400 |
| H | -1.20548100 | -1.26192900 | -2.76199300 |
| H | 0.83266300  | -1.07580300 | -3.98914400 |
| O | 1.02827000  | 3.17169200  | -2.63066800 |
| H | 0.05746000  | 3.12372000  | -2.59120600 |
| O | 4.46142500  | 2.21107400  | 0.46435400  |
| H | 4.84594500  | 1.44709100  | 0.97828100  |
| O | 1.51348100  | -5.88209100 | -1.79544800 |
| H | 2.09820800  | -5.32508300 | -2.37652100 |
| O | -0.79153200 | -7.00023600 | -0.67968200 |
| H | -0.00656900 | -7.32184600 | -0.18913100 |
| O | -2.83853300 | -5.39608300 | 0.02629700  |
| H | -2.65637200 | -6.35160100 | 0.10004400  |
| C | -0.42333600 | -0.76484500 | 3.03685300  |
| C | -0.51934700 | 0.56199400  | 2.61452000  |
| C | 0.59458500  | 1.41105000  | 2.60680800  |
| C | 1.81669900  | 0.86696000  | 3.02290400  |
| C | 1.93864400  | -0.45271800 | 3.44720700  |
| C | 0.80526900  | -1.25841700 | 3.47157400  |
| H | -1.31728200 | -1.38075100 | 3.05546600  |
| H | 2.89615200  | -0.80546700 | 3.80934500  |
| O | 2.96236900  | 1.60240200  | 3.05715100  |
| C | 2.91349600  | 3.03661000  | 3.08563500  |

|   |             |             |            |
|---|-------------|-------------|------------|
| H | 3.20443800  | 3.38243200  | 2.08519500 |
| C | 3.95257000  | 3.50352600  | 4.09399600 |
| C | 5.13310000  | 2.76665800  | 4.23985500 |
| C | 3.75460900  | 4.66997700  | 4.84152200 |
| C | 6.10411700  | 3.19567000  | 5.14302100 |
| H | 5.29069200  | 1.86284900  | 3.65855200 |
| C | 4.72787700  | 5.08984000  | 5.74754200 |
| H | 2.86693500  | 5.28643900  | 4.73996900 |
| C | 5.89128000  | 4.35068200  | 5.89967200 |
| C | 0.53850500  | 2.90095000  | 2.38545100 |
| H | -0.47359800 | 3.28625200  | 2.54646900 |
| H | 0.86274900  | 3.19960400  | 1.37938400 |
| O | 1.06981000  | 3.25181100  | 4.67502000 |
| C | 1.50578700  | 3.55745300  | 3.36320700 |
| H | 1.50619200  | 4.64343800  | 3.19530300 |
| H | 1.81229200  | 3.39208500  | 5.28414400 |
| O | -1.77786500 | 1.00206600  | 2.29897000 |
| H | -1.76735500 | 1.61945300  | 1.53882800 |
| O | 0.90990200  | -2.53994100 | 3.95882000 |
| H | 0.13832400  | -2.68847800 | 4.57792700 |
| O | 7.28088800  | 2.57297300  | 5.39262700 |
| H | 7.57344200  | 2.05722800  | 4.58420400 |
| O | 6.83019600  | 4.78942800  | 6.79225200 |
| H | 7.58675700  | 4.18408500  | 6.69751700 |
| O | 4.54009800  | 6.22362200  | 6.47863500 |
| H | 5.33213800  | 6.34237400  | 7.02789900 |
| C | -3.12607900 | -6.09131500 | 3.08333100 |
| C | -2.50899200 | -4.84882200 | 2.93590900 |
| C | -1.14824400 | -4.76534700 | 2.65356700 |
| C | -0.41811400 | -5.93534800 | 2.43472300 |
| C | -1.04060000 | -7.17824800 | 2.55976600 |
| C | -2.38233100 | -7.25730400 | 2.92132400 |
| H | -4.18877800 | -6.14383800 | 3.30285000 |
| H | -0.69383000 | -3.78956300 | 2.49634600 |
| H | -0.46100300 | -8.07505100 | 2.36409500 |
| H | -2.85696200 | -8.22543700 | 3.04273500 |
| C | -3.30906900 | -3.57902000 | 2.93341100 |
| O | -3.13991100 | -2.67782500 | 3.75571300 |
| N | -4.20493700 | -3.50560600 | 1.92505700 |
| H | -4.17231300 | -4.25898900 | 1.24056800 |
| C | 0.98815300  | -5.89466200 | 1.91157900 |
| O | 1.39897000  | -6.78856400 | 1.16389100 |
| N | 1.71633000  | -4.83031000 | 2.30867300 |
| H | 1.29133300  | -4.18732300 | 2.97995600 |
| C | -5.03161400 | -2.37902200 | 1.64394000 |



|   |              |             |             |
|---|--------------|-------------|-------------|
| C | -6.32873400  | -2.59563700 | 1.25562200  |
| C | -4.51841900  | -1.05737400 | 1.71241400  |
| C | -7.15758900  | -1.50826200 | 0.88389100  |
| H | -6.74372600  | -3.60041300 | 1.22783000  |
| C | -5.30661100  | 0.00929500  | 1.35873100  |
| H | -3.50248400  | -0.87992600 | 2.04860500  |
| C | -8.50279300  | -1.74918600 | 0.50030100  |
| C | -6.64034700  | -0.18144900 | 0.90466900  |
| H | -4.90203300  | 1.01000000  | 1.45829600  |
| C | -9.30155200  | -0.70181700 | 0.13583900  |
| H | -8.88069600  | -2.76995300 | 0.51597500  |
| C | -7.50285000  | 0.86881400  | 0.45734900  |
| C | -8.80027800  | 0.61970100  | 0.09207000  |
| H | -9.44155300  | 1.43177800  | -0.23224900 |
| C | 2.92633300   | -4.33794800 | 1.77839700  |
| C | 3.48915700   | -4.72732900 | 0.58550800  |
| C | 3.52332600   | -3.29935800 | 2.53875600  |
| C | 4.57341800   | -3.97860100 | 0.05316300  |
| H | 3.10436800   | -5.56623600 | 0.01975300  |
| C | 4.55823400   | -2.56201000 | 2.04027700  |
| H | 3.10838500   | -3.07361000 | 3.51482200  |
| C | 5.12819900   | -4.32673400 | -1.21098000 |
| C | 5.06928000   | -2.83202300 | 0.74266800  |
| H | 4.96630900   | -1.74313400 | 2.61881100  |
| C | 6.04787900   | -3.50365200 | -1.80323000 |
| H | 4.80413300   | -5.23776900 | -1.71055100 |
| C | 6.02300000   | -2.00334200 | 0.07734200  |
| C | 6.48619900   | -2.31572800 | -1.17301100 |
| H | 7.19150600   | -1.65761900 | -1.67050300 |
| S | -10.97823000 | -1.00192700 | -0.39829500 |
| S | -6.89718300  | 2.53852000  | 0.21161000  |
| S | 6.70012700   | -3.86565700 | -3.42536800 |
| S | 6.69699100   | -0.53337400 | 0.85111200  |
| O | -8.02598500  | 3.29625800  | -0.35739000 |
| O | -6.39835800  | 3.05407000  | 1.50230400  |
| O | -11.43432900 | -2.20379500 | 0.36441200  |
| O | -10.89134600 | -1.28451800 | -1.85460100 |
| O | 5.56658300   | 0.12970700  | 1.56988000  |
| O | 7.22943000   | 0.28383100  | -0.25703800 |
| O | 6.14683800   | -5.18192600 | -3.80151200 |
| O | 8.16530200   | -3.82031800 | -3.28107400 |
| O | 6.17105900   | -2.77746200 | -4.30255400 |
| O | 7.72416800   | -0.98733200 | 1.81293600  |
| O | -11.73301700 | 0.21886600  | -0.07592500 |
| O | -5.76800300  | 2.38724900  | -0.76835200 |

|   |              |             |             |
|---|--------------|-------------|-------------|
| O | 3.39782000   | -1.79667900 | -2.14514600 |
| H | 3.39680700   | -1.71394700 | -1.17749200 |
| H | 2.47116300   | -1.58612500 | -2.42337400 |
| O | 0.88614700   | -0.38272900 | -5.49812700 |
| H | 1.26559300   | 0.52069500  | -5.45186800 |
| H | 1.64711400   | -0.97432200 | -5.69639400 |
| O | -12.69609400 | -3.47239700 | -1.88461100 |
| H | -12.50438300 | -3.33631500 | -0.93864300 |
| H | -12.39231500 | -2.61685400 | -2.23843700 |
| O | -6.14701000  | 5.50918200  | -2.15376500 |
| H | -5.98089200  | 5.35175800  | -1.20765800 |
| H | -6.65683900  | 4.72896200  | -2.46684100 |
| O | 2.95703400   | -2.04057600 | -5.16950800 |
| H | 3.64537500   | -1.45790600 | -4.78465600 |
| H | 3.45846500   | -2.76402100 | -5.62568700 |
| O | 7.19255500   | 3.03122500  | 1.10983100  |
| H | 6.44929600   | 2.75277400  | 0.55076400  |
| H | 7.99982400   | 2.68645800  | 0.67169200  |
| O | 8.68476700   | -6.53473500 | -4.12165200 |
| H | 7.71660500   | -6.46322100 | -4.12571100 |
| H | 8.90951300   | -5.63481300 | -3.83429000 |
| O | -1.82382200  | 2.81495400  | 4.64116900  |
| H | -0.86056900  | 2.77682800  | 4.75800200  |
| H | -2.01240400  | 2.18314200  | 3.92902700  |
| O | 4.35408600   | 2.29899600  | -3.76358200 |
| H | 4.78507800   | 1.41448300  | -3.85339500 |
| H | 3.93628000   | 2.26303600  | -2.88388300 |
| O | 8.01480800   | 1.47781600  | 3.14251400  |
| H | 7.79234700   | 0.54750800  | 2.93393600  |
| H | 7.51335200   | 2.02402100  | 2.47897600  |
| O | 4.89794700   | -0.38078100 | -3.86924800 |
| H | 4.46278800   | -0.74775300 | -3.06491900 |
| H | 5.61471500   | -1.02799800 | -4.03678500 |
| O | -7.30062600  | 3.14339500  | -3.03769600 |
| H | -7.93971400  | 3.14193200  | -2.30159400 |
| H | -6.54721300  | 2.69425300  | -2.61265600 |
| O | 2.96069700   | -4.23871700 | -3.42229200 |
| H | 2.45662600   | -3.57817400 | -3.94207600 |
| H | 3.52314300   | -3.63733700 | -2.89259700 |
| O | 9.53063300   | 1.61080300  | 0.65920200  |
| H | 8.98268800   | 0.92794300  | 0.22892400  |
| H | 9.38337400   | 1.44171100  | 1.60766400  |
| O | 1.93145200   | 2.21340300  | -5.15647500 |
| H | 2.86596800   | 2.17210100  | -4.84721300 |
| H | 1.48620100   | 2.58044800  | -4.36770100 |

|   |              |             |             |
|---|--------------|-------------|-------------|
| O | -1.15653400  | -2.63439700 | 5.58841300  |
| H | -1.94098000  | -2.76864100 | 5.00774300  |
| H | -1.20536600  | -1.69754900 | 5.83021800  |
| O | 3.26633000   | -7.86185000 | -0.69309500 |
| H | 2.96657800   | -7.69840100 | 0.21373200  |
| H | 2.59564700   | -7.37490400 | -1.19936400 |
| O | -9.89385800  | -4.67780000 | 0.47741500  |
| H | -10.51999400 | -3.96390200 | 0.68458100  |
| H | -9.78970400  | -4.56596800 | -0.49189500 |
| O | -3.77458500  | 5.09026800  | -3.31365600 |
| H | -3.32147700  | 4.63423700  | -2.58862500 |
| H | -4.68163700  | 5.25879100  | -2.93725900 |
| O | -9.97082500  | -3.97254100 | -2.22258100 |
| H | -10.94409800 | -4.08370400 | -2.23235500 |
| H | -9.90353200  | -3.00126500 | -2.17958000 |
| O | 4.37105400   | -4.19652100 | -5.94035000 |
| H | 4.11012300   | -4.65877200 | -5.12091500 |
| H | 5.23176800   | -3.82871500 | -5.66474200 |
| O | -12.87850600 | -0.71338600 | 2.40803700  |
| H | -12.50071000 | -1.50810200 | 1.99958900  |
| H | -12.68802900 | -0.06591400 | 1.71021700  |

### (3) Complexes of sensor molecule **1** and GCg **6**

#### **1:** GCg **6** = 1:1 complex

Number of imaginary frequency = 0

Sum of electronic and zero-point Energies = -6881.453479 au

Sum of electronic and thermal Energies = -6881.339943 au

Sum of electronic and thermal Enthalpies = -6881.338998 au

Sum of electronic and thermal Free Energies = -6881.607351 au

|   |             |             |             |
|---|-------------|-------------|-------------|
| C | -5.56364100 | -1.30065700 | -2.86952100 |
| C | -4.83721500 | -2.45142500 | -2.55931300 |
| H | -5.23146700 | -3.41394500 | -2.84204000 |
| C | -3.59670400 | -2.36160900 | -1.93560500 |
| C | -5.05466400 | -0.04670800 | -2.53329900 |
| H | -5.56532200 | 0.87301100  | -2.79243800 |
| O | -6.72188700 | -1.47090500 | -3.54485800 |
| H | -7.31258700 | -0.67334800 | -3.39808200 |
| O | -2.87980800 | -3.47180700 | -1.63809300 |
| H | -3.43156200 | -4.26310700 | -1.85629100 |
| C | -3.80190400 | 0.01221500  | -1.92333200 |
| C | -3.04315500 | -1.11481600 | -1.61005800 |
| C | -1.67343100 | -1.00943900 | -0.99453900 |

|   |             |             |             |
|---|-------------|-------------|-------------|
| H | -1.59482200 | -1.64693300 | -0.10372800 |
| H | -0.91830800 | -1.36477700 | -1.70863600 |
| C | -1.31660200 | 0.42847800  | -0.62699900 |
| H | -1.64435000 | 0.69051900  | 0.37746900  |
| C | -1.93362300 | 1.43972600  | -1.60437700 |
| H | -1.51852600 | 1.24230600  | -2.60573600 |
| O | -3.34108800 | 1.27072300  | -1.63516800 |
| C | -1.65746100 | 2.86643700  | -1.18352100 |
| O | 0.09630000  | 0.59243900  | -0.73093400 |
| C | -0.40967200 | 3.45396100  | -1.40529800 |
| H | 0.39199100  | 2.92191200  | -1.90770800 |
| C | -0.17950400 | 4.75510300  | -0.96638100 |
| C | -1.18364000 | 5.45883100  | -0.30392800 |
| C | -2.42232000 | 4.86655400  | -0.08577500 |
| C | -2.66358000 | 3.57041300  | -0.52446800 |
| H | -3.63569300 | 3.12346700  | -0.36724800 |
| O | -3.34314100 | 5.63929900  | 0.56856700  |
| H | -4.23238500 | 5.20185800  | 0.50033100  |
| O | -0.91252700 | 6.74124800  | 0.10012300  |
| H | -1.73987700 | 7.10235000  | 0.45867100  |
| O | 1.02180300  | 5.35746400  | -1.19069000 |
| H | 0.96647700  | 6.25179300  | -0.81712000 |
| C | 0.85118200  | 0.73372600  | 0.36407500  |
| C | 2.26848000  | 0.95163600  | 0.01276400  |
| O | 0.41275400  | 0.70411300  | 1.50314200  |
| C | 3.17529700  | 1.34764400  | 0.99764400  |
| H | 2.83486500  | 1.47076600  | 2.02258500  |
| C | 4.50179800  | 1.57794900  | 0.65352400  |
| C | 4.94638500  | 1.41306300  | -0.66904300 |
| C | 4.03269900  | 0.93481200  | -1.62243500 |
| C | 2.69964500  | 0.74880300  | -1.29809500 |
| H | 2.00984400  | 0.40792800  | -2.06094000 |
| O | 4.43948600  | 0.62344300  | -2.88040400 |
| H | 5.42041300  | 0.53161000  | -2.94053500 |
| O | 6.19929900  | 1.62359500  | -1.08215700 |
| H | 6.78237400  | 2.10188500  | -0.41071700 |
| O | 5.45535700  | 1.96655200  | 1.55740900  |
| H | 5.07970400  | 1.92890800  | 2.44785000  |
| C | 1.96663200  | -3.56413400 | 4.74358400  |
| C | 1.99154200  | -2.69965300 | 3.64616500  |
| C | 0.79928100  | -2.21308900 | 3.10256100  |
| C | -0.41840400 | -2.60878200 | 3.65998800  |
| C | -0.43825700 | -3.51435800 | 4.72299600  |
| C | 0.74960100  | -3.98300300 | 5.26890500  |
| H | 2.90368600  | -3.90068300 | 5.17831800  |

|   |             |             |             |
|---|-------------|-------------|-------------|
| H | 0.82644200  | -1.52064100 | 2.26231900  |
| H | -1.40273200 | -3.82432900 | 5.11097000  |
| H | 0.73012400  | -4.67033900 | 6.10875100  |
| C | 3.34232100  | -2.32125100 | 3.11547100  |
| O | 4.32492600  | -2.27876200 | 3.85714500  |
| N | 3.41120100  | -2.07866800 | 1.78558500  |
| H | 2.57842800  | -2.20176600 | 1.20379600  |
| C | -1.76172600 | -2.11586500 | 3.19706800  |
| O | -2.76950000 | -2.77406800 | 3.40247000  |
| N | -1.77149500 | -0.88501400 | 2.60182300  |
| H | -0.90658900 | -0.35436100 | 2.51802100  |
| C | 4.59143800  | -1.81134500 | 1.06124700  |
| C | 5.72694800  | -1.24395000 | 1.59462800  |
| C | 4.55093600  | -2.13456300 | -0.31591600 |
| C | 6.83268700  | -0.95539200 | 0.75542100  |
| H | 5.77892600  | -0.98962700 | 2.64501400  |
| C | 5.60403000  | -1.85598700 | -1.14007000 |
| H | 3.65821400  | -2.58927800 | -0.72415800 |
| C | 7.99500600  | -0.33419900 | 1.28590200  |
| C | 6.78231600  | -1.25636800 | -0.63437900 |
| H | 5.51989400  | -2.08483600 | -2.19174900 |
| C | 9.03199000  | 0.00118600  | 0.46150400  |
| H | 8.06063400  | -0.13296300 | 2.35090000  |
| C | 7.89283300  | -0.89594100 | -1.45293600 |
| C | 8.97492300  | -0.24281000 | -0.93132000 |
| H | 9.77676800  | 0.10230500  | -1.57747400 |
| C | -2.94712800 | -0.20816300 | 2.21531700  |
| C | -4.02241800 | -0.85680000 | 1.66103100  |
| C | -2.98474400 | 1.20277100  | 2.38065400  |
| C | -5.17558500 | -0.12375000 | 1.28552800  |
| H | -4.00370800 | -1.93024400 | 1.51302300  |
| C | -4.08197100 | 1.93268100  | 2.01007900  |
| H | -2.11886800 | 1.70955300  | 2.79870600  |
| C | -6.29218800 | -0.80279300 | 0.74039100  |
| C | -5.22416900 | 1.29112900  | 1.45699200  |
| H | -4.06689400 | 3.00367700  | 2.17053800  |
| C | -7.42225800 | -0.11150400 | 0.39677400  |
| H | -6.23860500 | -1.88093700 | 0.61665300  |
| C | -6.42272200 | 1.96677800  | 1.07429000  |
| C | -7.49569900 | 1.28839400  | 0.55224600  |
| H | -8.39303800 | 1.82150000  | 0.25911300  |
| S | 10.51628800 | 0.74510700  | 1.11964600  |
| S | 7.85870700  | -1.19046500 | -3.22139200 |
| S | -8.83508500 | -1.00961100 | -0.21569800 |
| S | -6.58009700 | 3.74558300  | 1.22497100  |

|   |              |             |             |
|---|--------------|-------------|-------------|
| O | 7.45091700   | -2.60584700 | -3.40386200 |
| O | 6.86863200   | -0.23763300 | -3.76939100 |
| O | 10.45793500  | 0.52344100  | 2.58264600  |
| O | 10.43673400  | 2.18972200  | 0.76355600  |
| O | -5.62439800  | 4.29204900  | 0.19569900  |
| O | -6.18804100  | 4.11146000  | 2.59536000  |
| O | -9.44480600  | -1.67287200 | 0.96861100  |
| O | -8.26686900  | -1.98652900 | -1.17749900 |
| O | -9.72516200  | -0.01146500 | -0.84011100 |
| O | -7.97750500  | 4.06438200  | 0.88170500  |
| O | 11.62079900  | 0.03843300  | 0.44271600  |
| O | 9.24779500   | -0.94309800 | -3.67540700 |
| O | 2.85572400   | -1.86260800 | -2.92178400 |
| H | 3.44499300   | -2.55846500 | -3.28151200 |
| H | 3.40212800   | -1.05709000 | -2.99419800 |
| O | 7.80281400   | 3.00561700  | 0.43004200  |
| H | 7.64442300   | 2.76605800  | 1.36302800  |
| H | 8.73670500   | 2.74187300  | 0.29473200  |
| O | 11.81526800  | -1.21739600 | -2.16599800 |
| H | 10.92191800  | -1.39135300 | -2.51270800 |
| H | 11.68638600  | -0.87947000 | -1.25798800 |
| O | -6.67036500  | 2.81445900  | -2.24845600 |
| H | -6.01139000  | 2.76880500  | -1.53802000 |
| H | -7.07508500  | 3.70386800  | -2.13967100 |
| O | -3.54294200  | 4.93477900  | 3.39118000  |
| H | -4.48576700  | 4.71779700  | 3.28261100  |
| H | -3.30690200  | 5.30600400  | 2.52569700  |
| O | -6.55201600  | -4.18376400 | -0.46332000 |
| H | -6.41982000  | -3.31625100 | -0.89143900 |
| H | -7.42922800  | -4.45799500 | -0.83495500 |
| O | 5.06342700   | -3.80612400 | 6.08923100  |
| H | 5.52074700   | -4.43278100 | 5.51307500  |
| H | 4.80793600   | -3.09716400 | 5.47021500  |
| O | -10.24120300 | -4.41240400 | 0.82255400  |
| H | -9.41675600  | -4.46196900 | 1.35862400  |
| H | -10.35260800 | -3.44409200 | 0.77121000  |
| O | 1.42639500   | -2.08405800 | -0.41263500 |
| H | 1.87227300   | -1.90877500 | -1.27325500 |
| H | 0.63803900   | -2.59891600 | -0.63412600 |
| O | -9.02226600  | -4.54538100 | -1.56761500 |
| H | -8.99051600  | -3.56416600 | -1.59276700 |
| H | -9.57231800  | -4.71216100 | -0.75938100 |
| O | -7.84676500  | -3.79120100 | 2.00099200  |
| H | -7.25332000  | -3.93667200 | 1.23553900  |
| H | -8.22304700  | -2.90499300 | 1.83936100  |

|   |             |             |             |
|---|-------------|-------------|-------------|
| O | -8.20554200 | 0.68205400  | -3.10552300 |
| H | -8.84814700 | 0.46173000  | -2.40261900 |
| H | -7.67698300 | 1.42988100  | -2.74527900 |
| O | 8.73533300  | 2.69061200  | 3.08581200  |
| H | 9.18034000  | 1.83185900  | 3.22098300  |
| H | 9.37109100  | 3.10055200  | 2.47541400  |
| O | -7.58015500 | 5.34543400  | -1.56787500 |
| H | -8.08226900 | 4.99427200  | -0.80717400 |
| H | -6.70297100 | 5.43034800  | -1.15525200 |
| O | -7.05234000 | -4.49813300 | -3.57604500 |
| H | -7.80649300 | -4.75057600 | -3.01301100 |
| H | -7.10350900 | -3.52448000 | -3.63251800 |
| O | 11.17070700 | 1.15725300  | -3.57566200 |
| H | 11.66238600 | 0.46801700  | -3.09207100 |
| H | 10.36161000 | 0.67499500  | -3.81351700 |
| O | 4.90960900  | -3.61374100 | -3.84884700 |
| H | 5.09197900  | -4.21556800 | -3.11300900 |
| H | 5.76151700  | -3.12839000 | -3.92729200 |
| O | -4.73185400 | -5.53175800 | -2.04756700 |
| H | -5.32844200 | -5.37860900 | -2.80594400 |
| H | -5.29347100 | -5.19917300 | -1.31279200 |

**1: GCg 6 = 1:2 complex**

Number of imaginary frequency = 0

Sum of electronic and zero-point Energies = -8251.588575 au

Sum of electronic and thermal Energies = -8251.455657 au

Sum of electronic and thermal Enthalpies = -8251.454713 au

Sum of electronic and thermal Free Energies = -8251.763063 au

|   |            |             |             |
|---|------------|-------------|-------------|
| C | 4.98765900 | -4.58728700 | -0.31231900 |
| C | 4.43459200 | -5.22609300 | -1.43274300 |
| H | 5.07546900 | -5.75536900 | -2.12868300 |
| C | 3.05751400 | -5.20003100 | -1.63792500 |
| C | 4.15124100 | -3.86944900 | 0.55140100  |
| H | 4.55451500 | -3.34245200 | 1.41051200  |
| O | 6.31401700 | -4.64475700 | -0.14317500 |
| H | 6.56039000 | -4.40008700 | 0.79616300  |
| O | 2.56807300 | -5.82519800 | -2.74667000 |
| H | 1.92289300 | -5.22517500 | -3.16859600 |
| C | 2.77575900 | -3.88191100 | 0.32964800  |
| C | 2.18584900 | -4.56412400 | -0.73782000 |
| C | 0.68682800 | -4.71523300 | -0.84775200 |
| H | 0.40337500 | -5.71334300 | -0.50329900 |
| H | 0.34078000 | -4.61177600 | -1.87795000 |

|   |             |             |             |
|---|-------------|-------------|-------------|
| C | 0.00465400  | -3.65933100 | 0.01438400  |
| H | 0.11219900  | -2.67670900 | -0.45417600 |
| C | 0.66619900  | -3.56827400 | 1.39782100  |
| H | 0.70909000  | -4.56455300 | 1.85123800  |
| O | 2.01998400  | -3.11870200 | 1.19592100  |
| C | -0.05602300 | -2.61489900 | 2.30940700  |
| O | -1.41621300 | -3.82070700 | 0.12048900  |
| C | -0.96505000 | -3.14653500 | 3.22183300  |
| H | -1.11847900 | -4.21878100 | 3.30696600  |
| C | -1.73119400 | -2.29598000 | 4.02041500  |
| C | -1.52244600 | -0.91122100 | 3.96634800  |
| C | -0.62645000 | -0.38343000 | 3.02706900  |
| C | 0.08754000  | -1.23379200 | 2.17860700  |
| H | 0.75147400  | -0.78587600 | 1.44498300  |
| O | -0.41098400 | 0.95076800  | 2.94334100  |
| H | -0.98312400 | 1.44330200  | 3.57371300  |
| O | -2.10338200 | -0.11334500 | 4.91176500  |
| H | -2.76682200 | 0.50639500  | 4.52752500  |
| O | -2.64501800 | -2.81993900 | 4.86664800  |
| H | -3.40409000 | -2.18437800 | 4.88997500  |
| C | -1.91544500 | -4.91612800 | 0.72106200  |
| C | -3.39529700 | -4.83716200 | 0.86728800  |
| O | -1.25247000 | -5.86895800 | 1.06728000  |
| C | -4.01074300 | -3.68835800 | 1.36894800  |
| H | -3.43246400 | -2.82786900 | 1.69630600  |
| C | -5.39829200 | -3.65463000 | 1.44609300  |
| C | -6.15349700 | -4.75217600 | 1.03398100  |
| C | -5.52238700 | -5.89712400 | 0.55394400  |
| C | -4.13784000 | -5.95595900 | 0.48855200  |
| H | -3.64342500 | -6.84743500 | 0.11635500  |
| O | -6.35337300 | -6.90566400 | 0.13192800  |
| H | -6.10858800 | -7.10478800 | -0.79090800 |
| O | -7.50918500 | -4.64507200 | 1.07878000  |
| H | -7.87113000 | -5.35596400 | 0.51531600  |
| O | -6.04239500 | -2.54005600 | 1.89604700  |
| H | -6.99938500 | -2.69604800 | 1.82480700  |
| C | 0.71999500  | -2.53959700 | -3.35850100 |
| C | 1.07283600  | -1.36717600 | -2.69252200 |
| H | 2.08908200  | -0.99640800 | -2.70853200 |
| C | 0.10148800  | -0.67314500 | -1.97755900 |
| C | -0.60951600 | -2.93782500 | -3.43047400 |
| H | -0.89619500 | -3.84424900 | -3.95162600 |
| O | 1.67535800  | -3.34570400 | -3.90762600 |
| H | 2.55158800  | -2.99935200 | -3.62070700 |
| O | 0.45950500  | 0.37678200  | -1.19045100 |



|   |             |             |             |
|---|-------------|-------------|-------------|
| H | 1.39727200  | 0.25873000  | -0.93815700 |
| C | -1.57176300 | -2.18841900 | -2.75189800 |
| C | -1.24524600 | -1.05359500 | -2.00292000 |
| C | -2.28211400 | -0.34977200 | -1.17693400 |
| H | -2.62045000 | 0.56871200  | -1.66928800 |
| H | -1.86945700 | -0.06025400 | -0.20337000 |
| C | -3.50312100 | -1.22723300 | -0.98030600 |
| H | -3.33154700 | -1.99288000 | -0.22311800 |
| C | -3.90914400 | -1.89804700 | -2.30192300 |
| H | -4.12905300 | -1.09371800 | -3.02257100 |
| O | -2.84025400 | -2.68462500 | -2.80669500 |
| C | -5.12308900 | -2.80355500 | -2.17295300 |
| O | -4.60774300 | -0.40271600 | -0.62461300 |
| C | -6.35753900 | -2.25095000 | -1.80321700 |
| H | -6.45631700 | -1.18989700 | -1.60681600 |
| C | -7.46314700 | -3.06899100 | -1.64496100 |
| C | -7.37141400 | -4.43413500 | -1.90336000 |
| C | -6.16363100 | -4.96824400 | -2.32567600 |
| C | -5.02988100 | -4.16751400 | -2.44119100 |
| H | -4.09133700 | -4.61565200 | -2.74076400 |
| O | -6.08652900 | -6.32145700 | -2.57522100 |
| H | -6.99460900 | -6.62651800 | -2.74817400 |
| O | -8.43043200 | -5.28506200 | -1.69899000 |
| H | -9.23022800 | -4.73837400 | -1.61537600 |
| O | -8.69394900 | -2.63711300 | -1.23943200 |
| H | -8.65484600 | -1.68838900 | -1.04339200 |
| C | -4.81555300 | -0.10512000 | 0.67735600  |
| C | -6.04785600 | 0.70105400  | 0.84328000  |
| O | -4.06784000 | -0.46224800 | 1.56077200  |
| C | -6.49115800 | 0.97990500  | 2.13831700  |
| H | -5.97506200 | 0.57983400  | 3.00067300  |
| C | -7.56497200 | 1.84034400  | 2.35123500  |
| C | -8.22943900 | 2.37414700  | 1.23792400  |
| C | -7.79994600 | 2.07555100  | -0.06003700 |
| C | -6.70429400 | 1.25134400  | -0.26740000 |
| H | -6.33580600 | 1.09778300  | -1.27601700 |
| O | -8.51992100 | 2.65704800  | -1.07575400 |
| H | -7.92439500 | 3.32147500  | -1.50314700 |
| O | -9.26638200 | 3.22428700  | 1.41353500  |
| H | -9.42851600 | 3.60004600  | 0.52758500  |
| O | -7.95762100 | 2.16668600  | 3.60377200  |
| H | -8.07037100 | 3.15725900  | 3.61836800  |
| C | 3.84338100  | 1.05899000  | -5.36567100 |
| C | 4.05234800  | 1.22146100  | -3.99488400 |
| C | 3.02553900  | 1.70735100  | -3.18913000 |

|   |             |             |             |
|---|-------------|-------------|-------------|
| C | 1.78874300  | 2.03948000  | -3.74502200 |
| C | 1.57447200  | 1.84146400  | -5.10864400 |
| C | 2.59870000  | 1.34472100  | -5.91419700 |
| H | 4.66238400  | 0.71796000  | -5.99142100 |
| H | 3.18820800  | 1.88866800  | -2.13018400 |
| H | 0.62876600  | 2.12273700  | -5.56393000 |
| H | 2.43033800  | 1.21043900  | -6.97774100 |
| C | 5.42573700  | 1.03633100  | -3.40846800 |
| O | 6.38930000  | 1.62918900  | -3.86007400 |
| N | 5.45171800  | 0.21267400  | -2.31328200 |
| H | 4.71729000  | -0.49233200 | -2.27480000 |
| C | 0.78281400  | 2.67913100  | -2.83059500 |
| O | 1.14366900  | 3.34025200  | -1.86764800 |
| N | -0.52510800 | 2.47480200  | -3.14904800 |
| H | -0.74150700 | 1.86926800  | -3.92864600 |
| C | 6.52611300  | 0.02677300  | -1.42530300 |
| C | 7.57278500  | 0.91122600  | -1.29427100 |
| C | 6.46202700  | -1.11409100 | -0.57788700 |
| C | 8.54875300  | 0.70970600  | -0.28288000 |
| H | 7.66053300  | 1.76955000  | -1.94870400 |
| C | 7.40058900  | -1.33121100 | 0.39327900  |
| H | 5.65476800  | -1.83004900 | -0.71599800 |
| C | 9.60825300  | 1.64652700  | -0.12615400 |
| C | 8.46528400  | -0.41040400 | 0.59362300  |
| H | 7.33543500  | -2.21866700 | 1.00881400  |
| C | 10.53376400 | 1.46576500  | 0.86821800  |
| H | 9.67042200  | 2.50214000  | -0.79828800 |
| C | 9.44056600  | -0.53995000 | 1.62772900  |
| C | 10.45178700 | 0.37398200  | 1.76353000  |
| H | 11.17043400 | 0.27069000  | 2.56886800  |
| C | -1.60093300 | 2.88361300  | -2.32551000 |
| C | -1.53691800 | 2.75581100  | -0.96063500 |
| C | -2.78009400 | 3.37216000  | -2.93170100 |
| C | -2.65560400 | 3.09023400  | -0.16308800 |
| H | -0.65367100 | 2.33896100  | -0.49237400 |
| C | -3.86217200 | 3.73700200  | -2.17226100 |
| H | -2.80789300 | 3.49018400  | -4.01099000 |
| C | -2.60774600 | 2.85916500  | 1.23437200  |
| C | -3.83083900 | 3.63138700  | -0.75411500 |
| H | -4.74514200 | 4.11758400  | -2.66453600 |
| C | -3.67432100 | 3.18506600  | 2.02367000  |
| H | -1.71335700 | 2.41910800  | 1.66710900  |
| C | -4.88944100 | 4.03385900  | 0.12582400  |
| C | -4.82572900 | 3.80988200  | 1.47930500  |
| H | -5.64228900 | 4.11989100  | 2.12743200  |

|   |             |             |             |
|---|-------------|-------------|-------------|
| S | 11.92480300 | 2.58192400  | 1.00386900  |
| S | 9.36575400  | -1.89575800 | 2.80989900  |
| S | -3.52067200 | 2.85555400  | 3.77487400  |
| S | -6.19839500 | 5.09410600  | -0.48776500 |
| O | 7.99413600  | -1.83236600 | 3.37850500  |
| O | 9.56320900  | -3.12314600 | 1.98979100  |
| O | 12.97958400 | 2.01784800  | 0.13149300  |
| O | 12.30187400 | 2.57791900  | 2.43643400  |
| O | -6.70793400 | 4.49106600  | -1.76261800 |
| O | -5.50653200 | 6.37854800  | -0.75901500 |
| O | -4.07152700 | 1.49459700  | 4.00985500  |
| O | -4.29713000 | 3.90769100  | 4.45539500  |
| O | -2.06877600 | 2.89535200  | 4.05444200  |
| O | -7.24136600 | 5.16512100  | 0.54369500  |
| O | 11.42789700 | 3.90404100  | 0.54076800  |
| O | 10.43795300 | -1.64102600 | 3.77657700  |
| O | -5.74096300 | 6.18603300  | 4.32035800  |
| H | -5.08144600 | 5.46737200  | 4.21839800  |
| H | -5.93612200 | 6.16424800  | 5.26726900  |
| O | 14.57787800 | 4.40486300  | 2.47102200  |
| H | 13.79585800 | 4.96734700  | 2.61808600  |
| H | 14.16614800 | 3.52889100  | 2.40668900  |
| O | -0.56749100 | 5.66434100  | -3.03373300 |
| H | -1.45797400 | 5.94750700  | -2.75244900 |
| H | -0.23627300 | 5.10118100  | -2.31800600 |
| O | -3.25893800 | 6.74103700  | -2.47908400 |
| H | -3.68478000 | 6.47895300  | -1.64135200 |
| H | -3.87467600 | 6.33728400  | -3.13154000 |
| O | -7.94305200 | 4.82298900  | 3.32868300  |
| H | -7.94495300 | 4.90866700  | 2.35938500  |
| H | -7.15904300 | 5.33000900  | 3.63534800  |
| O | -5.44525900 | 8.53915500  | -2.52725700 |
| H | -4.50252300 | 8.28388100  | -2.54355700 |
| H | -5.76224000 | 8.02840600  | -1.75991500 |
| O | 2.88635600  | -0.84312000 | -0.28164500 |
| H | 3.64465300  | -0.46323200 | 0.19014300  |
| H | 2.47246600  | -1.46365800 | 0.35552100  |
| O | 7.11659200  | -4.23263700 | 2.32660500  |
| H | 6.99018900  | -3.40080900 | 2.82721700  |
| H | 8.08341800  | -4.14064100 | 2.15438900  |
| O | 11.90477700 | 5.34803300  | 2.92493200  |
| H | 11.66400900 | 5.19895700  | 1.99143300  |
| H | 11.90910900 | 4.42529700  | 3.23455700  |
| O | 10.60073200 | 4.02542000  | -2.20766400 |
| H | 11.07335300 | 3.20791300  | -2.45828300 |

|   |             |             |             |
|---|-------------|-------------|-------------|
| H | 10.92482500 | 4.18139200  | -1.30269100 |
| O | 3.89535800  | -2.33029700 | -2.51813800 |
| H | 4.45772300  | -3.10199400 | -2.32231600 |
| H | 3.43055900  | -2.15206900 | -1.67396200 |
| O | -5.59689400 | 6.10897600  | -3.89410800 |
| H | -6.10662800 | 5.58065500  | -3.25060400 |
| H | -5.74834200 | 7.03282500  | -3.60203600 |
| O | 11.91505700 | 1.50773600  | -2.37942700 |
| H | 12.43354100 | 1.67640000  | -1.56253000 |
| H | 11.18894000 | 0.95102700  | -2.06298500 |
| O | -4.78169100 | -1.28102700 | 4.23361000  |
| H | -4.47457700 | -0.39859900 | 3.96192300  |
| H | -5.07814900 | -1.67487000 | 3.39455500  |

**1: GCg 6 = 1:3 complex**

Number of imaginary frequency = 0

Sum of electronic and zero-point Energies = -10614.666793 au

Sum of electronic and thermal Energies = -10614.486372 au

Sum of electronic and thermal Enthalpies = -10614.485427 au

Sum of electronic and thermal Free Energies = -10614.884182 au

|   |             |             |             |
|---|-------------|-------------|-------------|
| C | -6.75032900 | -2.20793100 | -2.31502600 |
| C | -5.40057200 | -2.43674700 | -2.59882300 |
| H | -5.04435700 | -3.43879800 | -2.79686200 |
| C | -4.50398300 | -1.37761900 | -2.56467700 |
| C | -7.19817300 | -0.91450100 | -2.04615400 |
| H | -8.23081700 | -0.71859800 | -1.78272600 |
| O | -7.64504100 | -3.21735100 | -2.31840400 |
| H | -7.15462000 | -4.08117600 | -2.36167400 |
| O | -3.17781000 | -1.57135800 | -2.83574400 |
| H | -2.94153400 | -2.51127200 | -2.67607900 |
| C | -6.27567400 | 0.12618200  | -2.06001100 |
| C | -4.91666100 | -0.06462800 | -2.31441600 |
| C | -3.95361400 | 1.09276700  | -2.27207800 |
| H | -3.83726700 | 1.55449200  | -3.26257800 |
| H | -2.96569400 | 0.74821800  | -1.95032000 |
| C | -4.50614400 | 2.10684700  | -1.28849200 |
| H | -4.49739900 | 1.69799200  | -0.27764300 |
| C | -5.94400000 | 2.50933400  | -1.65467900 |
| H | -5.90177800 | 3.05341100  | -2.61202500 |
| O | -6.79327600 | 1.37602200  | -1.79960100 |
| C | -6.53300300 | 3.37471500  | -0.56917900 |
| O | -3.70910700 | 3.30902200  | -1.31786600 |
| C | -6.53707800 | 4.75915400  | -0.66759800 |

|   |             |             |             |
|---|-------------|-------------|-------------|
| H | -6.20000600 | 5.26799700  | -1.56645000 |
| C | -6.96211400 | 5.54796000  | 0.41064700  |
| C | -7.37290500 | 4.90725500  | 1.57804800  |
| C | -7.36446200 | 3.50940200  | 1.67075800  |
| C | -6.95406900 | 2.73561000  | 0.59805200  |
| H | -6.96936700 | 1.65170100  | 0.66842400  |
| O | -7.78915600 | 3.01525700  | 2.86074300  |
| H | -7.51677300 | 2.06263600  | 2.93742200  |
| O | -7.80476300 | 5.61853100  | 2.68068400  |
| H | -7.95963300 | 4.94509300  | 3.36807700  |
| O | -6.96338600 | 6.89243900  | 0.24952800  |
| H | -7.16977000 | 7.37228000  | 1.08090400  |
| C | -3.50970300 | 3.98025000  | -0.14221400 |
| C | -2.88047700 | 5.31497000  | -0.34462000 |
| O | -3.79200600 | 3.51954300  | 0.93415000  |
| C | -2.30237000 | 5.91426500  | 0.77733400  |
| H | -2.29373100 | 5.40895200  | 1.73664600  |
| C | -1.71560700 | 7.15986000  | 0.63065300  |
| C | -1.70522100 | 7.82278300  | -0.59961300 |
| C | -2.29072200 | 7.21739500  | -1.71570000 |
| C | -2.88722200 | 5.96262000  | -1.58347500 |
| H | -3.36673900 | 5.50895800  | -2.44428800 |
| O | -2.25331700 | 7.90850000  | -2.88837200 |
| H | -2.36025500 | 7.28959000  | -3.66289000 |
| O | -1.03409900 | 9.00746100  | -0.62348400 |
| H | -1.43683800 | 9.63463100  | -1.27722000 |
| O | -1.08928800 | 7.77615100  | 1.68052600  |
| H | -0.84002000 | 8.66076900  | 1.35489000  |
| C | 4.02505000  | 2.29016500  | 5.73172600  |
| C | 3.45370600  | 1.01797300  | 5.78443300  |
| H | 2.80566700  | 0.72945700  | 6.60810900  |
| C | 3.72776500  | 0.10022500  | 4.76985800  |
| C | 4.89388800  | 2.62604100  | 4.70044600  |
| H | 5.32452700  | 3.61764700  | 4.64059400  |
| O | 3.76295000  | 3.23996400  | 6.67216800  |
| H | 2.95298000  | 2.98619800  | 7.14770500  |
| O | 3.18831600  | -1.14647400 | 4.78589900  |
| H | 2.27482500  | -1.10941600 | 5.13397700  |
| C | 5.17580400  | 1.67647100  | 3.72293000  |
| C | 4.60154200  | 0.39877500  | 3.71875400  |
| C | 4.95474400  | -0.64250900 | 2.67516800  |
| H | 4.19645000  | -0.72563100 | 1.88714500  |
| H | 5.03698400  | -1.63214400 | 3.13117900  |
| C | 6.27784500  | -0.19907100 | 2.09300900  |
| H | 7.02185500  | -0.20329000 | 2.88863300  |

|   |             |             |             |
|---|-------------|-------------|-------------|
| C | 6.12205000  | 1.26155200  | 1.58905800  |
| H | 5.16148000  | 1.35116700  | 1.06105200  |
| O | 6.08915300  | 2.06843100  | 2.76919400  |
| C | 7.24748400  | 1.71913300  | 0.69296100  |
| O | 6.73320300  | -1.05296100 | 1.04507700  |
| C | 8.39949800  | 2.30819400  | 1.22617200  |
| H | 8.44274900  | 2.61302100  | 2.26336500  |
| C | 9.52046500  | 2.48374200  | 0.42143900  |
| C | 9.47588600  | 2.08510000  | -0.91592300 |
| C | 8.30055200  | 1.60158100  | -1.46996300 |
| C | 7.17801800  | 1.40693300  | -0.66547800 |
| H | 6.28920100  | 0.95576100  | -1.10218600 |
| O | 8.26030500  | 1.25434100  | -2.79156000 |
| H | 9.16686000  | 1.20898200  | -3.14065600 |
| O | 10.62304200 | 2.11974900  | -1.67823000 |
| H | 11.29652100 | 2.52182000  | -1.09712700 |
| O | 10.69617800 | 3.02761600  | 0.81745200  |
| H | 10.83053900 | 2.85887000  | 1.79906200  |
| C | 8.05748600  | -1.13243600 | 0.88529500  |
| C | 8.45410000  | -1.55036300 | -0.47027000 |
| O | 8.85355300  | -0.81382200 | 1.76614400  |
| C | 7.52052200  | -2.10975500 | -1.34351300 |
| H | 6.54149700  | -2.42094200 | -0.99518800 |
| C | 7.84646800  | -2.21959600 | -2.68638400 |
| C | 9.06944100  | -1.73527300 | -3.17023100 |
| C | 9.98614400  | -1.15389300 | -2.28980600 |
| C | 9.70055700  | -1.11364100 | -0.93209400 |
| H | 10.39918800 | -0.61990800 | -0.26256500 |
| O | 11.07998300 | -0.53623700 | -2.83193700 |
| H | 11.28990700 | 0.22976200  | -2.26804000 |
| O | 9.30505700  | -1.73047500 | -4.50087200 |
| H | 8.48383400  | -2.07108600 | -4.90191500 |
| O | 6.99534300  | -2.69688500 | -3.63868600 |
| H | 6.09789900  | -2.34083300 | -3.42178500 |
| C | -4.75801500 | -5.69277800 | 4.13753900  |
| C | -5.33653300 | -4.43843300 | 4.33001600  |
| H | -6.41576700 | -4.33285600 | 4.34708900  |
| C | -4.50978300 | -3.31801300 | 4.41494700  |
| C | -3.37204800 | -5.84316400 | 4.10833000  |
| H | -2.91088600 | -6.81858600 | 3.99420900  |
| O | -5.57645200 | -6.77515100 | 3.98038100  |
| H | -5.19385000 | -7.28458600 | 3.23103500  |
| O | -4.99778800 | -2.07247300 | 4.61112000  |
| H | -5.93135700 | -2.03047100 | 4.29446200  |
| C | -2.56996200 | -4.70538600 | 4.17074900  |

|   |             |             |             |
|---|-------------|-------------|-------------|
| C | -3.12007200 | -3.43222700 | 4.28877600  |
| C | -2.24808400 | -2.22919300 | 4.07472400  |
| H | -1.84695500 | -1.81285000 | 5.00369100  |
| H | -2.82902600 | -1.44688600 | 3.57382500  |
| C | -1.11784600 | -2.69319100 | 3.16745900  |
| H | -1.53614500 | -3.08362600 | 2.23565500  |
| C | -0.32282000 | -3.84436100 | 3.80509400  |
| H | 0.13615800  | -3.49600400 | 4.73678000  |
| O | -1.22049200 | -4.91451700 | 4.11768300  |
| C | 0.72045000  | -4.37525900 | 2.84668900  |
| O | -0.28809900 | -1.60179400 | 2.72920900  |
| C | 1.90120300  | -3.67198400 | 2.60795800  |
| H | 2.17915200  | -2.78176400 | 3.16745800  |
| C | 2.75796200  | -4.09580500 | 1.59469400  |
| C | 2.47504600  | -5.24983700 | 0.84500400  |
| C | 1.32017600  | -5.97949000 | 1.14591900  |
| C | 0.43715000  | -5.52595200 | 2.12266100  |
| H | -0.47102800 | -6.07812500 | 2.32539500  |
| O | 1.07789500  | -7.15298400 | 0.47734100  |
| H | 0.13621200  | -7.41626900 | 0.65925600  |
| O | 3.38721900  | -5.62449400 | -0.10339000 |
| H | 2.91121300  | -5.92182100 | -0.91176400 |
| O | 3.89340300  | -3.39209000 | 1.35555800  |
| H | 4.14033300  | -3.50902600 | 0.41477500  |
| C | 0.36919600  | -0.87405700 | 3.61515000  |
| C | 1.01168900  | 0.32542900  | 3.03720200  |
| O | 0.41794200  | -1.12618900 | 4.81684600  |
| C | 1.58949600  | 0.38250800  | 1.76733400  |
| H | 1.61685000  | -0.49950300 | 1.13092100  |
| C | 2.14307200  | 1.58147200  | 1.32164800  |
| C | 2.08913500  | 2.74173600  | 2.12511400  |
| C | 1.56797300  | 2.63205800  | 3.41694000  |
| C | 1.00412900  | 1.44702100  | 3.85499700  |
| H | 0.56191400  | 1.38888100  | 4.84203500  |
| O | 1.57479600  | 3.75536500  | 4.21316400  |
| H | 1.68630800  | 3.46963700  | 5.13942500  |
| O | 2.56472900  | 3.90085900  | 1.63522800  |
| H | 2.14736400  | 4.65922900  | 2.10844900  |
| O | 2.70501100  | 1.72472600  | 0.09447000  |
| H | 2.99896300  | 0.85025600  | -0.24194200 |
| C | 0.76495400  | 5.81008100  | -2.98676000 |
| C | 0.35507300  | 4.55378500  | -3.43242400 |
| C | -0.00651000 | 3.57696900  | -2.49894700 |
| C | 0.12736300  | 3.82160700  | -1.13849700 |
| C | 0.57276400  | 5.06984800  | -0.69361900 |

|   |             |             |             |
|---|-------------|-------------|-------------|
| C | 0.87341800  | 6.06300600  | -1.61943700 |
| H | 0.99575900  | 6.57842100  | -3.71862000 |
| H | -0.43807300 | 2.64339000  | -2.83947200 |
| H | 0.65794400  | 5.24531200  | 0.37495500  |
| H | 1.17555800  | 7.04824400  | -1.27661000 |
| C | 0.27773700  | 4.30957900  | -4.90484200 |
| O | 0.00436000  | 5.21088500  | -5.70454200 |
| N | 0.52079200  | 3.05708800  | -5.37077700 |
| H | 0.30551100  | 2.94797800  | -6.35525200 |
| C | -0.34675200 | 2.81259900  | -0.13913200 |
| O | -0.79955300 | 3.16611700  | 0.94257400  |
| N | -0.31895500 | 1.51040200  | -0.55246600 |
| H | 0.32846200  | 1.28360700  | -1.30030700 |
| C | 0.98755500  | 1.91774300  | -4.65778400 |
| C | 0.24237500  | 0.76648400  | -4.65762600 |
| C | 2.20296300  | 1.98474900  | -3.93466800 |
| C | 0.70035200  | -0.37267900 | -3.95173100 |
| H | -0.71270100 | 0.71884100  | -5.17511200 |
| C | 2.64604400  | 0.90751200  | -3.21157800 |
| H | 2.78864000  | 2.89767400  | -3.95126700 |
| C | -0.05383300 | -1.57307700 | -3.98370800 |
| C | 1.92289400  | -0.31668000 | -3.22385100 |
| H | 3.57730300  | 1.00114900  | -2.66684800 |
| C | 0.41121900  | -2.68280900 | -3.33992500 |
| H | -0.98580900 | -1.59756200 | -4.54087900 |
| C | 2.37126000  | -1.51636200 | -2.58451600 |
| C | 1.64119900  | -2.67407300 | -2.63451400 |
| H | 2.01373900  | -3.56981100 | -2.14410300 |
| C | -1.10576000 | 0.45296400  | -0.05353000 |
| C | -2.23303800 | 0.66782600  | 0.70432000  |
| C | -0.78426400 | -0.86256700 | -0.47736100 |
| C | -3.14771300 | -0.39131600 | 0.91835900  |
| H | -2.48578000 | 1.65490200  | 1.06985800  |
| C | -1.62483100 | -1.91583600 | -0.22726200 |
| H | 0.14145000  | -1.02851700 | -1.02472200 |
| C | -4.39722000 | -0.11436100 | 1.54197900  |
| C | -2.86961800 | -1.69978700 | 0.43190300  |
| H | -1.34521600 | -2.91250400 | -0.56197900 |
| C | -5.34310500 | -1.09474600 | 1.65584600  |
| H | -4.60325500 | 0.89110100  | 1.90369800  |
| C | -3.87927600 | -2.69643600 | 0.61282800  |
| C | -5.08708100 | -2.40970100 | 1.19571600  |
| H | -5.83431400 | -3.18811700 | 1.30711500  |
| S | -0.49277200 | -4.20887200 | -3.48381900 |
| S | 3.98329400  | -1.55818000 | -1.80476000 |



|   |             |             |             |
|---|-------------|-------------|-------------|
| S | -6.95062600 | -0.70499500 | 2.34412600  |
| S | -3.60755500 | -4.35629900 | 0.00645200  |
| O | 4.92220500  | -1.16915400 | -2.90003000 |
| O | 3.95510000  | -0.56202900 | -0.70918500 |
| O | 0.21375000  | -5.01753000 | -4.49884000 |
| O | -1.86357400 | -3.82764500 | -3.91692300 |
| O | -4.89097000 | -5.09248900 | 0.21994400  |
| O | -2.50145800 | -4.93375000 | 0.80589200  |
| O | -7.28477300 | -1.84593300 | 3.23445300  |
| O | -7.87437900 | -0.57143400 | 1.20511400  |
| O | -6.75380900 | 0.56524500  | 3.09257700  |
| O | -3.27267000 | -4.22224700 | -1.42971100 |
| O | -0.43688000 | -4.80962800 | -2.12960700 |
| O | 4.20275800  | -2.94702400 | -1.37136100 |
| O | -3.92513900 | -5.76699000 | -3.84855000 |
| H | -3.46698200 | -6.28631200 | -3.13758600 |
| H | -3.47614200 | -4.90520500 | -3.74558400 |
| O | -7.67509500 | 8.32963900  | 2.52416700  |
| H | -8.59507600 | 8.56312500  | 2.33796500  |
| H | -7.73260200 | 7.45848400  | 2.95830100  |
| O | -4.41565300 | 4.73790000  | -5.75172300 |
| H | -4.00176000 | 4.07857900  | -5.15010600 |
| H | -5.24243500 | 4.99153000  | -5.31991700 |
| O | -2.85371700 | -1.78762800 | -5.67720300 |
| H | -2.52456300 | -2.67944300 | -5.47541100 |
| H | -3.11149100 | -1.49082900 | -4.78588600 |
| O | -0.43812300 | -7.86301400 | -3.51354200 |
| H | -0.85793400 | -7.49828700 | -4.32683700 |
| H | 0.37307400  | -7.34042700 | -3.37129800 |
| O | 8.71600500  | 0.99883500  | 4.09578600  |
| H | 7.89030400  | 1.48437300  | 3.92653300  |
| H | 8.78465500  | 0.39190200  | 3.33396900  |
| O | -2.38312600 | 10.53980500 | -2.37399900 |
| H | -2.53358800 | 9.71079600  | -2.87200000 |
| H | -3.23561900 | 10.75308400 | -1.97017400 |
| O | -2.33818400 | 6.21367100  | -4.84525800 |
| H | -3.08758400 | 5.88370200  | -5.39429500 |
| H | -1.48832600 | 6.04714400  | -5.31048200 |
| O | 5.56054300  | 1.50646000  | -3.74087000 |
| H | 6.51137400  | 1.57506200  | -3.56521100 |
| H | 5.36913800  | 0.56996700  | -3.55718700 |
| O | 1.69387700  | -6.55366800 | -2.08535900 |
| H | 1.40100600  | -7.06319900 | -1.30011400 |
| H | 1.02693800  | -5.83300100 | -2.10597200 |
| O | -3.41257400 | -8.95032500 | -0.51279300 |

|   |             |             |             |
|---|-------------|-------------|-------------|
| H | -4.01547800 | -8.56449200 | 0.15361900  |
| H | -3.27198500 | -8.22290600 | -1.15260800 |
| O | 1.05252900  | 2.75197200  | 6.93685300  |
| H | 0.68714600  | 1.85499000  | 6.93122200  |
| H | 0.38701400  | 3.30466200  | 7.37226500  |
| O | -1.83183100 | -6.63705500 | -5.57323300 |
| H | -2.63990600 | -6.34642600 | -5.09964900 |
| H | -1.21631100 | -5.88772300 | -5.47585400 |
| O | 11.50915200 | -0.05078600 | 1.83002800  |
| H | 10.58575700 | -0.37077400 | 1.75920900  |
| H | 12.02966200 | -0.83716100 | 2.04303500  |
| O | -9.47818100 | 0.96531700  | -0.58897300 |
| H | -9.05801200 | 0.44625300  | 0.12004800  |
| H | -8.70650900 | 1.36642900  | -1.01880500 |
| O | 0.93447900  | 5.94317600  | 2.54201500  |
| H | 0.50787400  | 6.71033700  | 2.12644100  |
| H | 0.17134900  | 5.42762300  | 2.88480400  |
| O | -2.68696000 | 3.58550600  | -4.00004400 |
| H | -2.84857500 | 3.43608900  | -3.05093400 |
| H | -2.31495700 | 4.48905600  | -4.04421900 |
| O | -1.55118200 | -7.54367300 | 0.93263400  |
| H | -1.80900000 | -6.64114500 | 0.63996400  |
| H | -2.03677700 | -8.16078100 | 0.33316300  |
| O | -4.36238200 | -7.43460100 | 1.62511500  |
| H | -3.40389400 | -7.31951800 | 1.77869800  |
| H | -4.62528600 | -6.57571500 | 1.21721800  |
| O | 11.07928200 | 2.23444300  | 3.27434100  |
| H | 10.24568300 | 1.97002300  | 3.71851500  |
| H | 11.42956000 | 1.38598100  | 2.92699800  |
| O | -2.35862700 | -6.86450800 | -1.95773500 |
| H | -2.08664800 | -5.96088400 | -1.69714000 |
| H | -1.57402300 | -7.25131400 | -2.43958900 |
| O | -6.23667500 | -5.51679000 | -2.24290500 |
| H | -5.77790600 | -5.40051300 | -1.38495100 |
| H | -5.50564900 | -5.59874700 | -2.89310500 |
| O | -1.10828100 | 4.28799600  | 3.49508600  |
| H | -0.36198400 | 3.95885800  | 4.02368600  |
| H | -1.13042900 | 3.70126100  | 2.71584400  |

**1:** GCg **6** = 1:4 complex

Number of imaginary frequency = 0

Sum of electronic and zero-point Energies = -12443.115199 au

Sum of electronic and thermal Energies = -12442.901602 au

Sum of electronic and thermal Enthalpies = -12442.900657 au

Sum of electronic and thermal Free Energies = -12443.364058 au

|   |             |             |             |
|---|-------------|-------------|-------------|
| C | -3.48709300 | -6.27683700 | 3.48109400  |
| C | -2.13989400 | -6.29372600 | 3.85113800  |
| H | -1.86005600 | -6.21621600 | 4.89562300  |
| C | -1.17661400 | -6.39859700 | 2.85766300  |
| C | -3.86627000 | -6.38781700 | 2.14627000  |
| H | -4.91051500 | -6.35935600 | 1.85136300  |
| O | -4.39446500 | -6.09378200 | 4.47523400  |
| H | -5.32199300 | -6.14393400 | 4.13542000  |
| O | 0.15835300  | -6.40181600 | 3.18222400  |
| H | 0.45776600  | -5.52651800 | 3.52329400  |
| C | -2.87841900 | -6.50643400 | 1.16623700  |
| C | -1.51692200 | -6.51811900 | 1.50423200  |
| C | -0.44996200 | -6.46097300 | 0.44007200  |
| H | -0.01184000 | -7.44078700 | 0.21114300  |
| H | 0.36013400  | -5.80569300 | 0.75959700  |
| C | -1.13970800 | -5.90183600 | -0.78262400 |
| H | -1.59108400 | -4.93854300 | -0.53133500 |
| C | -2.33260900 | -6.81309900 | -1.13272400 |
| H | -2.03088300 | -7.86533900 | -1.05134100 |
| O | -3.32207300 | -6.55308700 | -0.12706700 |
| C | -2.84549500 | -6.55186100 | -2.52170800 |
| O | -0.28353500 | -5.54637000 | -1.86498700 |
| C | -3.20560900 | -5.26909800 | -2.94252900 |
| H | -3.33085100 | -4.45930700 | -2.22735300 |
| C | -3.34428400 | -4.99988800 | -4.30595100 |
| C | -3.09763200 | -6.00672600 | -5.24841700 |
| C | -2.80448600 | -7.29902300 | -4.81430300 |
| C | -2.69567200 | -7.57360200 | -3.45473600 |
| H | -2.40393600 | -8.56921900 | -3.13721400 |
| O | -2.54633700 | -8.21880600 | -5.78756600 |
| H | -1.92407700 | -8.88173600 | -5.41790100 |
| O | -3.08693000 | -5.69835300 | -6.57333000 |
| H | -2.56269100 | -6.39758100 | -7.00943400 |
| O | -3.66200300 | -3.77744300 | -4.79890500 |
| H | -3.72316500 | -3.11944400 | -4.06447100 |
| C | 0.14460000  | -6.41308600 | -2.77420900 |
| C | 0.37732500  | -5.73562000 | -4.07061500 |
| O | 0.24312300  | -7.61921400 | -2.55747700 |
| C | 0.15777700  | -6.47413600 | -5.24090300 |
| H | -0.00337700 | -7.54606600 | -5.22900000 |
| C | -0.03565300 | -5.77731700 | -6.42636800 |
| C | 0.04435600  | -4.38429000 | -6.46601800 |
| C | 0.39402600  | -3.66466300 | -5.31319900 |

|   |             |             |             |
|---|-------------|-------------|-------------|
| C | 0.53170900  | -4.34696100 | -4.10843200 |
| H | 0.75285900  | -3.79655500 | -3.20012700 |
| O | 0.49629900  | -2.32887200 | -5.43301900 |
| H | 0.81431100  | -1.93211300 | -4.58535000 |
| O | -0.25276200 | -3.77973000 | -7.64390300 |
| H | -0.92932100 | -3.07090900 | -7.40730500 |
| O | -0.41593100 | -6.42531800 | -7.56492200 |
| H | -0.53543600 | -5.71378100 | -8.22338300 |
| C | -1.66233000 | 8.28299300  | -2.46346200 |
| C | -1.39779900 | 8.32013200  | -1.08738900 |
| H | -0.61986800 | 8.96472800  | -0.68790100 |
| C | -2.15158300 | 7.52196400  | -0.22968300 |
| C | -2.68298700 | 7.47966000  | -2.96859400 |
| H | -2.87835300 | 7.42618100  | -4.03369600 |
| O | -0.97576300 | 9.06113700  | -3.33000600 |
| H | -0.09882300 | 9.30960300  | -2.92232700 |
| O | -1.94776200 | 7.50378500  | 1.11296600  |
| H | -1.00159400 | 7.66680800  | 1.30711500  |
| C | -3.42782500 | 6.71056300  | -2.08120000 |
| C | -3.17883600 | 6.70035200  | -0.70674200 |
| C | -3.91174300 | 5.77938300  | 0.22941000  |
| H | -4.68386900 | 6.30724500  | 0.80610500  |
| H | -3.22120900 | 5.34682200  | 0.95932900  |
| C | -4.57619400 | 4.69890600  | -0.59041500 |
| H | -3.85168800 | 4.00741100  | -1.02602800 |
| C | -5.35659100 | 5.33429100  | -1.75794700 |
| H | -6.02953000 | 6.10697700  | -1.35461100 |
| O | -4.41763200 | 5.93291100  | -2.64009600 |
| C | -6.13044000 | 4.26899800  | -2.48114000 |
| O | -5.46725100 | 3.98524100  | 0.26830200  |
| C | -7.42016200 | 3.98122100  | -2.03761600 |
| H | -7.93030300 | 4.61681600  | -1.32013600 |
| C | -8.01187900 | 2.78478600  | -2.43352200 |
| C | -7.33467900 | 1.90707700  | -3.27793200 |
| C | -6.05967400 | 2.22560200  | -3.76299100 |
| C | -5.46065100 | 3.42542800  | -3.36655400 |
| H | -4.44834700 | 3.66327400  | -3.68231500 |
| O | -5.46446900 | 1.30982100  | -4.55110100 |
| H | -4.49720400 | 1.51748400  | -4.63628600 |
| O | -7.92935100 | 0.69473700  | -3.53372600 |
| H | -7.28982800 | 0.04039000  | -3.15740900 |
| O | -9.23572900 | 2.42329700  | -1.96693200 |
| H | -9.36725800 | 1.51619000  | -2.29931200 |
| C | -5.64410100 | 2.67059200  | 0.08426700  |
| C | -6.69339800 | 2.12915400  | 0.98465300  |

|   |             |             |             |
|---|-------------|-------------|-------------|
| O | -5.00064700 | 1.98861100  | -0.68774800 |
| C | -7.00962100 | 0.77531900  | 0.88714300  |
| H | -6.54477800 | 0.14203400  | 0.13620900  |
| C | -7.97029800 | 0.23358300  | 1.73191200  |
| C | -8.62410900 | 1.03817900  | 2.66870700  |
| C | -8.29389500 | 2.39904300  | 2.74057900  |
| C | -7.33758100 | 2.95306500  | 1.91047800  |
| H | -7.08317800 | 4.00306200  | 1.99999000  |
| O | -8.88176800 | 3.16366500  | 3.70593300  |
| H | -9.52392000 | 2.60027400  | 4.17170200  |
| O | -9.52925200 | 0.61756700  | 3.58802000  |
| H | -9.91444700 | -0.26471000 | 3.37757000  |
| O | -8.22792000 | -1.12132800 | 1.65756400  |
| H | -9.19164000 | -1.28612200 | 1.62932600  |
| C | 1.91859400  | 0.24055000  | -0.05170800 |
| C | 1.49166700  | 1.11269000  | -1.05083800 |
| H | 0.43638900  | 1.31233900  | -1.20520600 |
| C | 2.46719400  | 1.68688000  | -1.86304000 |
| C | 3.25519400  | -0.04308700 | 0.16261100  |
| H | 3.58687600  | -0.72514400 | 0.93706000  |
| O | 0.95309900  | -0.34698800 | 0.73845000  |
| H | 1.38720200  | -1.08796600 | 1.21056100  |
| O | 2.16973900  | 2.60341400  | -2.82813000 |
| H | 1.23164900  | 2.56712200  | -3.09845100 |
| C | 4.19127000  | 0.51047600  | -0.70432100 |
| C | 3.82668300  | 1.38847700  | -1.72093800 |
| C | 4.87383500  | 1.99470300  | -2.61200000 |
| H | 4.60825400  | 3.01956000  | -2.87836800 |
| H | 4.97895200  | 1.41971500  | -3.54067400 |
| C | 6.21126400  | 1.99568300  | -1.89903400 |
| H | 7.02706600  | 2.26114800  | -2.57487100 |
| C | 6.52893400  | 0.63016000  | -1.26728000 |
| H | 7.36315800  | 0.76169000  | -0.56936100 |
| O | 5.47267000  | 0.12662800  | -0.47457600 |
| C | 6.98390800  | -0.31214000 | -2.34938100 |
| O | 6.14672300  | 2.95908000  | -0.84427500 |
| C | 8.29604800  | -0.10764800 | -2.76267500 |
| H | 8.91560600  | 0.60204700  | -2.22490600 |
| C | 8.80993200  | -0.73328300 | -3.89258300 |
| C | 8.01343400  | -1.67043600 | -4.55337100 |
| C | 6.71220600  | -1.91854500 | -4.09237800 |
| C | 6.17138800  | -1.23142900 | -3.00359700 |
| H | 5.15487300  | -1.43466300 | -2.67301100 |
| O | 6.04529400  | -2.87912000 | -4.79748000 |
| H | 5.04078500  | -2.83545000 | -4.62385700 |

|   |             |             |             |
|---|-------------|-------------|-------------|
| O | 8.48073800  | -2.32938200 | -5.65066800 |
| H | 7.73612100  | -2.87680300 | -5.95455800 |
| O | 10.05237300 | -0.44190000 | -4.36404700 |
| H | 10.32457500 | 0.39273600  | -3.93387800 |
| C | 7.31177300  | 3.33223300  | -0.31262900 |
| C | 7.12522800  | 3.92717700  | 1.03441500  |
| O | 8.39420100  | 3.13043000  | -0.83876100 |
| C | 5.85282300  | 4.30024100  | 1.47646700  |
| H | 5.00842700  | 4.27492100  | 0.79441600  |
| C | 5.67785800  | 4.65665500  | 2.81140100  |
| C | 6.76257800  | 4.58599500  | 3.69340300  |
| C | 8.03858000  | 4.26890900  | 3.21228000  |
| C | 8.23444200  | 3.94479000  | 1.87735100  |
| H | 9.21131500  | 3.64944800  | 1.51372000  |
| O | 9.07470700  | 4.25461200  | 4.08759600  |
| H | 8.70210300  | 4.55705300  | 4.93554700  |
| O | 6.63460100  | 4.80914100  | 5.04038400  |
| H | 6.54370600  | 3.90323300  | 5.44884900  |
| O | 4.47907600  | 5.04446200  | 3.32756500  |
| H | 3.78377200  | 5.08879700  | 2.63734300  |
| C | 1.93492400  | -3.25519200 | 9.95659300  |
| C | 2.80810700  | -4.29831500 | 9.64310400  |
| H | 2.95790200  | -5.10164200 | 10.35763300 |
| C | 3.46472100  | -4.27560300 | 8.41896700  |
| C | 1.71547500  | -2.21714500 | 9.06185000  |
| H | 1.03294100  | -1.40217000 | 9.28114500  |
| O | 1.31415600  | -3.31680300 | 11.16734200 |
| H | 0.74219300  | -2.54253600 | 11.26598900 |
| O | 4.33620200  | -5.25660100 | 8.05185200  |
| H | 4.40608800  | -5.90131300 | 8.77008400  |
| C | 2.39017400  | -2.22681000 | 7.83752600  |
| C | 3.28020300  | -3.24205300 | 7.49173000  |
| C | 4.03277700  | -3.21536800 | 6.18746100  |
| H | 3.58596600  | -3.90823200 | 5.46336000  |
| H | 5.07234200  | -3.52242100 | 6.33980800  |
| C | 3.97325500  | -1.81752200 | 5.58968000  |
| H | 4.62412800  | -1.11604000 | 6.11984300  |
| C | 2.53139500  | -1.30289700 | 5.64275500  |
| H | 1.88582000  | -2.04834300 | 5.15571900  |
| O | 2.14197300  | -1.16918900 | 7.01534600  |
| C | 2.36682100  | 0.04641400  | 4.99879800  |
| O | 4.38182600  | -1.91111200 | 4.22924200  |
| C | 1.53522900  | 0.21383800  | 3.89299700  |
| H | 0.96156500  | -0.62275700 | 3.50192200  |
| C | 1.40530800  | 1.47643500  | 3.31291900  |

|   |             |             |             |
|---|-------------|-------------|-------------|
| C | 2.12172500  | 2.55504700  | 3.83063800  |
| C | 2.95899400  | 2.38227600  | 4.92883600  |
| C | 3.07141700  | 1.12907700  | 5.52031100  |
| H | 3.71177800  | 1.00727700  | 6.38903700  |
| O | 3.66851800  | 3.43234900  | 5.43900500  |
| H | 3.83398200  | 4.10606000  | 4.73758600  |
| O | 2.02345300  | 3.79319700  | 3.27182500  |
| H | 1.57528900  | 3.72784200  | 2.40639900  |
| O | 0.59698700  | 1.77943200  | 2.26890200  |
| H | 0.47037500  | 0.97674500  | 1.71705100  |
| C | 5.45256900  | -1.20050900 | 3.80604900  |
| C | 5.94055800  | -1.68917800 | 2.49863100  |
| O | 5.95742600  | -0.30882600 | 4.46043600  |
| C | 7.10961000  | -1.14098000 | 1.96211300  |
| H | 7.61461900  | -0.31861700 | 2.45640900  |
| C | 7.61394800  | -1.66452200 | 0.78292300  |
| C | 6.96573600  | -2.71783600 | 0.11394800  |
| C | 5.76357600  | -3.21402500 | 0.63410600  |
| C | 5.27564200  | -2.72839900 | 1.83919000  |
| H | 4.37064100  | -3.15098500 | 2.25698000  |
| O | 5.15615600  | -4.21228000 | -0.07412300 |
| H | 4.27383200  | -4.38698900 | 0.29395400  |
| O | 7.57592000  | -3.18608600 | -0.98549000 |
| H | 6.99357900  | -3.77844600 | -1.56200000 |
| O | 8.75585400  | -1.16408700 | 0.23089400  |
| H | 8.81206200  | -1.54684900 | -0.66559500 |
| C | -6.81186100 | -0.48909400 | 5.23638500  |
| C | -5.73717000 | -0.98000900 | 4.48399700  |
| C | -4.85884400 | -0.07430800 | 3.87457200  |
| C | -5.08104500 | 1.29858700  | 3.98964900  |
| C | -6.13889300 | 1.76741100  | 4.77348000  |
| C | -7.00127900 | 0.87548800  | 5.39444100  |
| H | -7.46857900 | -1.19448600 | 5.73222000  |
| H | -3.98027000 | -0.43510100 | 3.35273700  |
| H | -6.27651300 | 2.83715000  | 4.88707600  |
| H | -7.83199000 | 1.24325500  | 5.98736700  |
| C | -5.57193500 | -2.47044100 | 4.51232700  |
| O | -6.25898400 | -3.12631400 | 5.31467300  |
| N | -4.68236500 | -3.12911300 | 3.73234100  |
| H | -4.57056500 | -4.10364000 | 4.02303400  |
| C | -4.21102800 | 2.34790200  | 3.35046100  |
| O | -4.29255200 | 3.51882900  | 3.69850400  |
| N | -3.32267000 | 1.92460700  | 2.39978200  |
| H | -3.51878700 | 1.04985900  | 1.92537400  |
| C | -3.98129500 | -2.74766200 | 2.55575800  |

|   |             |             |             |
|---|-------------|-------------|-------------|
| C | -2.66710000 | -3.11674200 | 2.42881800  |
| C | -4.64277300 | -2.09499900 | 1.48164600  |
| C | -1.96287000 | -2.87170900 | 1.22387900  |
| H | -2.16202200 | -3.62758900 | 3.24416200  |
| C | -3.97718000 | -1.82482000 | 0.31216100  |
| H | -5.69146000 | -1.82326900 | 1.58311900  |
| C | -0.59977800 | -3.24906400 | 1.10644400  |
| C | -2.62004500 | -2.22455400 | 0.13752500  |
| H | -4.51101000 | -1.33207500 | -0.49357700 |
| C | 0.07332400  | -3.02033500 | -0.06287400 |
| H | -0.10064900 | -3.71158000 | 1.95693100  |
| C | -1.87001300 | -2.02265400 | -1.06228600 |
| C | -0.55809500 | -2.40035700 | -1.16268100 |
| H | -0.00482400 | -2.17947700 | -2.06883700 |
| C | -2.39399600 | 2.78948800  | 1.76283400  |
| C | -2.16915500 | 2.66733900  | 0.41546300  |
| C | -1.67277200 | 3.75379300  | 2.51601500  |
| C | -1.29740700 | 3.57294500  | -0.24232600 |
| H | -2.71100600 | 1.93679300  | -0.18277300 |
| C | -0.77079700 | 4.58979400  | 1.91040300  |
| H | -1.84216600 | 3.82806200  | 3.58272600  |
| C | -1.26226000 | 3.59795200  | -1.65949200 |
| C | -0.56038000 | 4.53847400  | 0.50253600  |
| H | -0.24500100 | 5.31374400  | 2.52481100  |
| C | -0.53469100 | 4.55486200  | -2.31587100 |
| H | -1.86989800 | 2.88342500  | -2.21006700 |
| C | 0.28552600  | 5.42747700  | -0.23302600 |
| C | 0.28671500  | 5.45645100  | -1.60556400 |
| H | 0.89392800  | 6.18247600  | -2.13957100 |
| S | 1.83787100  | -3.30485500 | -0.12003500 |
| S | -2.59880600 | -1.22415800 | -2.49142700 |
| S | -0.61816800 | 4.62946000  | -4.10010000 |
| S | 1.46228500  | 6.48828400  | 0.60235200  |
| O | -3.83281500 | -2.01902900 | -2.77818100 |
| O | -2.92137100 | 0.15681100  | -2.07449900 |
| O | 2.29294400  | -2.73831500 | 1.18018700  |
| O | 2.14319800  | -4.76834500 | -0.16848100 |
| O | 0.73008100  | 7.29743700  | 1.60885000  |
| O | 2.09474200  | 7.32558600  | -0.43586100 |
| O | -2.04918400 | 4.37001700  | -4.41850400 |
| O | 0.25721600  | 3.53856500  | -4.59474600 |
| O | -0.16057500 | 5.97489000  | -4.47995400 |
| O | 2.41110800  | 5.52506700  | 1.23200100  |
| O | 2.31830500  | -2.62665600 | -1.32864600 |
| O | -1.60289000 | -1.32358100 | -3.57696000 |



|   |             |             |             |
|---|-------------|-------------|-------------|
| O | -5.97738800 | -0.41206900 | -2.02185200 |
| H | -5.29828500 | -0.94640600 | -2.47932100 |
| H | -5.51498100 | 0.42324000  | -1.81119800 |
| O | -6.94679500 | -5.57763600 | 4.14339500  |
| H | -6.74313500 | -4.88896200 | 4.80622900  |
| H | -7.45481100 | -5.08455200 | 3.47700800  |
| O | 2.17880200  | 7.44927400  | -4.28112700 |
| H | 2.92497900  | 7.10052300  | -3.72869400 |
| H | 1.47005100  | 6.77574000  | -4.32103400 |
| O | -4.12632500 | 5.96463500  | -5.53854700 |
| H | -4.55163500 | 5.94176000  | -4.66723200 |
| H | -3.28984900 | 5.50401200  | -5.34803600 |
| O | -8.38800400 | -3.20842300 | 3.46808000  |
| H | -7.97090600 | -3.08525500 | 4.34031100  |
| H | -7.97755100 | -2.52680400 | 2.89671800  |
| O | 3.53554000  | -2.95797100 | -4.32094700 |
| H | 3.38438900  | -3.64486000 | -3.63109500 |
| H | 3.03367500  | -2.16085800 | -4.05954100 |
| O | 1.46911700  | 9.26723800  | -2.39082900 |
| H | 1.51685500  | 8.68592900  | -1.60915900 |
| H | 1.75034500  | 8.68180700  | -3.13799000 |
| O | 1.74396900  | -1.01088800 | -3.45330600 |
| H | 1.30463100  | -0.13212900 | -3.56016600 |
| H | 1.86708300  | -1.15611100 | -2.49717200 |
| O | 10.00922800 | 2.36800200  | -3.32126400 |
| H | 9.29268800  | 2.51408400  | -3.95530000 |
| H | 9.61166300  | 2.62119900  | -2.46679300 |
| O | 2.74585300  | -6.32161500 | 2.10380200  |
| H | 2.56852600  | -5.87960900 | 1.25183600  |
| H | 1.90295600  | -6.75951700 | 2.31801000  |
| O | 1.05955500  | 6.34064900  | 4.29910000  |
| H | 1.06691800  | 6.80435600  | 3.44482500  |
| H | 1.48552400  | 5.49288200  | 4.09454200  |
| O | 6.30947300  | -4.72798600 | -2.65308600 |
| H | 5.36831200  | -4.85655900 | -2.40481700 |
| H | 6.27553200  | -4.26229300 | -3.50866400 |
| O | 3.55315700  | -5.10230600 | -2.62079600 |
| H | 3.34362200  | -5.98593000 | -2.99652200 |
| H | 3.04867000  | -5.01249100 | -1.79059900 |
| O | 6.16102100  | 2.31457400  | 5.89656400  |
| H | 6.21830000  | 1.56462600  | 5.27632100  |
| H | 5.21934600  | 2.57268300  | 5.88949800  |
| O | -2.08895100 | -2.25767100 | -6.58123500 |
| H | -2.67046400 | -2.92200000 | -6.15910400 |
| H | -1.61168500 | -1.85887300 | -5.83035900 |

|   |              |              |             |
|---|--------------|--------------|-------------|
| O | 1.78012400   | -4.23293800  | 3.56797100  |
| H | 1.88597500   | -3.50345200  | 2.92931600  |
| H | 2.36321500   | -4.92893900  | 3.17971100  |
| O | 2.87304400   | -7.53742800  | -3.81480000 |
| H | 2.08512200   | -7.86873100  | -3.34936400 |
| H | 2.50197300   | -7.16983800  | -4.63223100 |
| O | -2.82092800  | 1.69919500   | -4.44062700 |
| H | -2.53517900  | 2.63874000   | -4.42490500 |
| H | -2.78001800  | 1.36078600   | -3.52510500 |
| O | -6.68332700  | 5.13594600   | 4.35735200  |
| H | -5.90172000  | 4.66112600   | 4.02636500  |
| H | -7.43664700  | 4.55153700   | 4.18229200  |
| O | 3.49844300   | 4.55622100   | -1.29103100 |
| H | 3.11421900   | 4.69716100   | -0.40728600 |
| H | 2.84391400   | 4.04877100   | -1.80605500 |
| O | -0.03151100  | 0.99660300   | -3.72827100 |
| H | -0.18605900  | 1.70546900   | -4.37977600 |
| H | -0.76127500  | 0.35576000   | -3.82492200 |
| O | 0.56597400   | 9.26355000   | -5.73833100 |
| H | 1.31473500   | 8.71097600   | -5.46154300 |
| H | -0.14444000  | 8.96563500   | -5.14642700 |
| O | 4.05365100   | 6.93559400   | -2.45360200 |
| H | 3.59808000   | 7.45882800   | -1.77407700 |
| H | 3.96339700   | 6.02808500   | -2.07744900 |
| O | -0.53262400  | -9.60659200  | -4.44936500 |
| H | -0.49712900  | -10.50092600 | -4.08503400 |
| H | -0.26453900  | -9.00544900  | -3.72595800 |
| O | -10.54337900 | -1.78204500  | 2.83299900  |
| H | -11.47430500 | -2.04076900  | 2.85735700  |
| H | -10.00152800 | -2.50651000  | 3.22680300  |

#### (4) Complexes of sensor molecule **1** and GC **8**

##### **1**: GC **8** = 1:1 complex

Number of imaginary frequency = 0

Sum of electronic and zero-point Energies = -6388.007024 au

Sum of electronic and thermal Energies = -6387.896703 au

Sum of electronic and thermal Enthalpies = -6387.895758 au

Sum of electronic and thermal Free Energies = -6388.163810 au

|   |            |             |             |
|---|------------|-------------|-------------|
| C | 0.05251000 | -5.56744900 | -0.04486400 |
| C | 1.39480100 | -5.22791400 | 0.08344100  |
| H | 2.19012900 | -5.91549100 | -0.19338900 |
| C | 1.72065900 | -3.94606900 | 0.53574900  |

|   |             |             |             |
|---|-------------|-------------|-------------|
| C | -0.95868300 | -4.68505200 | 0.29867100  |
| H | -2.00437400 | -4.94860700 | 0.19643400  |
| O | -0.33591400 | -6.78539300 | -0.55607700 |
| H | 0.44867300  | -7.26021900 | -0.86780000 |
| O | 3.00643000  | -3.54819300 | 0.62574600  |
| H | 3.59913400  | -4.29318000 | 0.30688600  |
| C | -0.59991000 | -3.40667900 | 0.72283600  |
| C | 0.72886100  | -3.00901600 | 0.86157400  |
| C | 1.07435800  | -1.61091400 | 1.30249800  |
| H | 1.40466500  | -1.00025200 | 0.44796400  |
| H | 1.90934200  | -1.63795800 | 2.01347300  |
| C | -0.14229300 | -0.92865700 | 1.92201900  |
| H | -0.36441200 | -1.32910200 | 2.92214600  |
| C | -1.36572700 | -1.17132200 | 1.03099300  |
| H | -1.11233900 | -0.81031000 | 0.02226100  |
| O | -1.63910200 | -2.56796100 | 0.97427200  |
| C | -2.62986000 | -0.50554400 | 1.51156400  |
| O | 0.04234500  | 0.47984400  | 1.98766000  |
| H | 0.90748800  | 0.64371900  | 2.39190700  |
| C | -3.54450100 | -1.21517400 | 2.28617500  |
| H | -3.38212800 | -2.25741300 | 2.53150800  |
| C | -4.72467600 | -0.60470800 | 2.70609800  |
| C | -4.98613900 | 0.71693500  | 2.35491200  |
| C | -4.04696000 | 1.44308000  | 1.61258500  |
| C | -2.87152200 | 0.83161500  | 1.18802800  |
| H | -2.14214800 | 1.39403100  | 0.61584500  |
| O | -4.39592300 | 2.73076900  | 1.37307400  |
| H | -3.82903300 | 3.10681100  | 0.66238700  |
| O | -6.16977000 | 1.28592200  | 2.71333000  |
| H | -6.20229100 | 2.15727800  | 2.27797500  |
| O | -5.63717900 | -1.29661000 | 3.45692300  |
| H | -6.47537100 | -1.28601400 | 2.93325800  |
| C | 2.51732900  | -4.65972200 | -3.17850800 |
| C | 2.56706000  | -3.40878700 | -2.55927900 |
| C | 1.38007600  | -2.74591600 | -2.28568400 |
| C | 0.14878400  | -3.27844600 | -2.65627200 |
| C | 0.09644300  | -4.52901000 | -3.27107700 |
| C | 1.28700900  | -5.21527200 | -3.52260900 |
| H | 3.44698600  | -5.18217500 | -3.38202500 |
| H | 1.37607600  | -1.80533200 | -1.75208700 |
| H | -0.85714900 | -4.96535000 | -3.55342600 |
| H | 1.25255000  | -6.18321200 | -4.01318500 |
| C | 3.88797500  | -2.82631100 | -2.15855500 |
| O | 4.91085200  | -3.51412700 | -2.16297000 |
| N | 3.87767300  | -1.51485500 | -1.80855900 |

|   |             |             |             |
|---|-------------|-------------|-------------|
| H | 3.04739200  | -0.94189200 | -1.96984300 |
| C | -1.01347800 | -2.37203200 | -2.38915500 |
| O | -0.80595700 | -1.15276500 | -2.34535100 |
| N | -2.23259300 | -2.92241100 | -2.18964900 |
| H | -2.29459800 | -3.94067000 | -2.10031600 |
| C | 4.96371500  | -0.82476800 | -1.23258800 |
| C | 5.07659600  | 0.52725500  | -1.45588400 |
| C | 5.87826700  | -1.48083000 | -0.36811700 |
| C | 6.12602300  | 1.27404400  | -0.86705300 |
| H | 4.35286400  | 1.03019000  | -2.09317000 |
| C | 6.89933000  | -0.77558300 | 0.21606000  |
| H | 5.75218800  | -2.53400500 | -0.15020400 |
| C | 6.24957000  | 2.67163100  | -1.10678000 |
| C | 7.06948400  | 0.61527900  | -0.02641100 |
| H | 7.58420200  | -1.29638500 | 0.87592200  |
| C | 7.29296400  | 3.37030800  | -0.57107100 |
| H | 5.50942900  | 3.19156500  | -1.70860800 |
| C | 8.12884300  | 1.39612900  | 0.52786800  |
| C | 8.25527700  | 2.72615100  | 0.23912500  |
| H | 9.08246300  | 3.29554800  | 0.64450200  |
| C | -3.36018200 | -2.17478000 | -1.78102800 |
| C | -3.53366800 | -0.85774800 | -2.13742200 |
| C | -4.33262600 | -2.80860600 | -0.96435600 |
| C | -4.62351400 | -0.12145400 | -1.62449200 |
| H | -2.85006900 | -0.35685500 | -2.81011500 |
| C | -5.42350500 | -2.11834800 | -0.49551700 |
| H | -4.18937600 | -3.85375000 | -0.70232600 |
| C | -4.71523600 | 1.25889000  | -1.93741500 |
| C | -5.59664800 | -0.73873700 | -0.79524500 |
| H | -6.14572000 | -2.61538100 | 0.14248200  |
| C | -5.73143300 | 2.00897300  | -1.42309700 |
| H | -3.96881900 | 1.69402400  | -2.59572100 |
| C | -6.66905000 | 0.08153100  | -0.31802000 |
| C | -6.72824900 | 1.42100900  | -0.60608100 |
| H | -7.54764000 | 2.01883900  | -0.22032600 |
| S | 7.48685900  | 5.13070300  | -0.84015600 |
| S | 9.30981400  | 0.69194500  | 1.67363300  |
| S | -5.83296600 | 3.74078200  | -1.84074600 |
| S | -8.08719200 | -0.63229000 | 0.51870200  |
| O | 9.96339300  | -0.43337800 | 0.94238400  |
| O | 10.23211500 | 1.78059600  | 2.02975100  |
| O | 6.17681700  | 5.58805500  | -1.35311800 |
| O | 8.60185000  | 5.27953900  | -1.78402100 |
| O | -8.88717500 | 0.51740900  | 1.00194800  |
| O | -7.57496200 | -1.46666200 | 1.64596100  |

|   |              |             |             |
|---|--------------|-------------|-------------|
| O | -6.03545200  | 4.44873400  | -0.55569800 |
| O | -6.94623000  | 3.89260600  | -2.79199000 |
| O | -4.50001400  | 4.06615800  | -2.44584000 |
| O | -8.76014000  | -1.44965100 | -0.50386700 |
| O | 7.79057300   | 5.64783300  | 0.52479300  |
| O | 8.51538700   | 0.19080200  | 2.82625400  |
| O | 5.72781900   | 7.63116300  | 0.60356500  |
| H | 6.51346500   | 7.14914700  | 0.91278600  |
| H | 5.54315500   | 7.10942900  | -0.19550100 |
| O | 5.63614500   | -3.93452200 | 1.85912800  |
| H | 4.83052000   | -3.39789000 | 1.90256200  |
| H | 6.35035100   | -3.38607800 | 2.26726700  |
| O | -7.29242900  | 0.08912100  | 5.37033200  |
| H | -6.51897900  | -0.18313000 | 4.84678300  |
| H | -7.98687500  | -0.53330100 | 5.06596700  |
| O | -11.19408900 | 0.08454000  | -0.71777100 |
| H | -10.69290300 | 0.54440400  | -0.02571900 |
| H | -10.57158900 | -0.63444800 | -0.91423900 |
| O | 4.70039600   | -5.39961300 | -0.17807600 |
| H | 5.32026200   | -5.06844500 | 0.51125000  |
| H | 4.95855600   | -4.93775400 | -1.00057200 |
| O | -2.68098000  | 3.53530600  | -0.61834600 |
| H | -2.21143600  | 4.34690900  | -0.37724500 |
| H | -3.32508700  | 3.79771500  | -1.33742700 |
| O | -8.90363100  | 1.59403300  | 3.62729400  |
| H | -8.14584600  | 1.31754300  | 4.18502000  |
| H | -8.63693500  | 1.35997100  | 2.71942800  |
| O | 7.48956100   | -2.40679000 | 3.10576600  |
| H | 8.44684700   | -2.62075800 | 3.09209800  |
| H | 7.50977900   | -1.43852000 | 2.98740900  |
| O | 9.38938100   | -1.08342600 | -1.79933900 |
| H | 9.67003900   | -0.82415100 | -0.90292500 |
| H | 8.42984700   | -1.15924700 | -1.71105600 |
| O | 1.56733100   | 0.37980500  | -2.09616500 |
| H | 0.82885500   | -0.08688700 | -2.52840000 |
| H | 1.08260100   | 1.06324500  | -1.60094100 |
| O | -2.45642600  | 2.56376100  | -4.02835700 |
| H | -1.83044800  | 2.33613300  | -3.31656800 |
| H | -3.08466700  | 3.19035800  | -3.63165000 |
| O | -0.97446800  | 1.59490900  | -1.71922900 |
| H | -1.34498500  | 0.69486500  | -1.69633500 |
| H | -1.57669700  | 2.17049500  | -1.20452500 |
| O | 10.23021400  | -2.13281500 | 3.16663900  |
| H | 10.31854500  | -1.77304700 | 2.26078800  |
| H | 9.91570900   | -1.34000500 | 3.63332300  |

|   |             |             |             |
|---|-------------|-------------|-------------|
| O | -2.59005400 | -5.81734000 | -2.01512000 |
| H | -3.14344800 | -6.43674200 | -2.50864300 |
| H | -1.86994700 | -6.34251300 | -1.61674800 |
| O | -8.43020600 | 5.82205800  | -1.33755600 |
| H | -7.88460700 | 5.42158200  | -0.63890400 |
| H | -8.17936300 | 5.25142800  | -2.08775600 |
| O | -5.94169200 | 7.23373000  | -1.46885800 |
| H | -6.88154400 | 6.98793200  | -1.54701800 |
| H | -5.56836100 | 6.42123300  | -1.09415900 |
| O | -9.34194100 | -1.12608500 | 3.92300900  |
| H | -8.87813800 | -1.38926800 | 3.10721000  |
| H | -9.49726000 | -0.16627000 | 3.78227400  |
| O | 9.86748000  | 4.73709500  | 2.42570400  |
| H | 9.86888500  | 3.76612000  | 2.41944900  |
| H | 9.14582300  | 5.00456200  | 1.82842500  |
| O | -1.65289200 | 0.62806500  | 4.30880100  |
| H | -2.52854100 | 0.33093900  | 4.02045300  |
| H | -1.21362900 | 0.83857800  | 3.46754800  |

**1: GC 8 = 1:2 complex**

Number of imaginary frequency = 0

Sum of electronic and zero-point Energies = -7570.316981 au

Sum of electronic and thermal Energies = -7570.186043 au

Sum of electronic and thermal Enthalpies = -7570.185099 au

Sum of electronic and thermal Free Energies = -7570.489030 au

|   |             |             |             |
|---|-------------|-------------|-------------|
| C | -1.70271300 | -1.05405300 | -3.95278200 |
| C | -2.57425300 | -1.71982700 | -3.08107300 |
| H | -3.63039400 | -1.46515800 | -3.07634000 |
| C | -2.07018700 | -2.69244200 | -2.21671300 |
| C | -0.34090700 | -1.34528300 | -3.93585600 |
| H | 0.34797900  | -0.82036500 | -4.58814600 |
| O | -2.12186000 | -0.12882300 | -4.83897300 |
| H | -3.08380100 | 0.05631700  | -4.74174900 |
| O | -2.89071200 | -3.36483000 | -1.35530700 |
| H | -3.83890000 | -3.21238900 | -1.60211800 |
| C | 0.13048100  | -2.31100200 | -3.05491300 |
| C | -0.70196300 | -3.01202100 | -2.17771400 |
| C | -0.12714300 | -4.04469000 | -1.23844100 |
| H | -0.24131100 | -5.06247000 | -1.63695500 |
| H | -0.64004500 | -4.02671100 | -0.27306800 |
| C | 1.35392300  | -3.77330700 | -1.03377500 |
| H | 1.47870900  | -2.82292300 | -0.49396200 |
| C | 2.05499400  | -3.61268100 | -2.38709700 |

|   |             |             |             |
|---|-------------|-------------|-------------|
| H | 1.90034200  | -4.53893800 | -2.96107200 |
| O | 1.48872100  | -2.51532800 | -3.10058400 |
| C | 3.53187600  | -3.34225300 | -2.22863400 |
| O | 1.92992900  | -4.84357600 | -0.31623000 |
| H | 2.81680400  | -4.56416400 | -0.02433900 |
| C | 4.44053600  | -4.39970500 | -2.22056000 |
| H | 4.11690200  | -5.42346800 | -2.38028200 |
| C | 5.80193500  | -4.15188800 | -2.04164300 |
| C | 6.26431900  | -2.83812200 | -1.84801200 |
| C | 5.34729300  | -1.77973400 | -1.86938100 |
| C | 3.98473300  | -2.03877600 | -2.03675100 |
| H | 3.29627200  | -1.19948200 | -2.04170800 |
| O | 5.71715400  | -0.47476900 | -1.75659100 |
| H | 6.67375600  | -0.35950100 | -1.56453500 |
| O | 7.60457600  | -2.72275300 | -1.62627100 |
| H | 7.96867600  | -1.82591800 | -1.78493100 |
| O | 6.66743700  | -5.18303500 | -2.06038600 |
| H | 7.60167500  | -4.87087300 | -2.18906300 |
| C | -2.27618500 | -3.00634700 | 5.13811900  |
| C | -1.06680500 | -2.38047600 | 5.43030600  |
| H | -0.25344000 | -2.93473000 | 5.88227500  |
| C | -0.89747600 | -1.04190300 | 5.09214900  |
| C | -3.29879200 | -2.32181300 | 4.49185700  |
| H | -4.23552000 | -2.80235300 | 4.22297900  |
| O | -2.38736700 | -4.32984600 | 5.45673300  |
| H | -3.28067200 | -4.62868400 | 5.23478700  |
| O | 0.28056400  | -0.44644700 | 5.41115300  |
| H | 0.59968600  | 0.07173800  | 4.63276900  |
| C | -3.10456000 | -0.97948300 | 4.15642900  |
| C | -1.93015500 | -0.30081100 | 4.48743000  |
| C | -1.84843900 | 1.19409400  | 4.31534600  |
| H | -1.24951100 | 1.47640300  | 3.44109100  |
| H | -1.36895700 | 1.63335400  | 5.20072700  |
| C | -3.24609000 | 1.77728100  | 4.10542900  |
| H | -3.84566400 | 1.68902000  | 5.02577400  |
| C | -3.92783300 | 0.94542100  | 3.01249200  |
| H | -3.21658400 | 0.89516800  | 2.17538400  |
| O | -4.14216600 | -0.37354200 | 3.51972800  |
| C | -5.25082100 | 1.45179500  | 2.48692700  |
| O | -3.18221900 | 3.11749200  | 3.66788800  |
| H | -2.57830400 | 3.58731900  | 4.26029400  |
| C | -5.26500100 | 2.56563900  | 1.64731100  |
| H | -4.35188300 | 3.09778100  | 1.40055300  |
| C | -6.45260600 | 2.96793800  | 1.04450700  |
| C | -7.63996500 | 2.26898200  | 1.26715600  |

|   |             |             |             |
|---|-------------|-------------|-------------|
| C | -7.62125100 | 1.16001400  | 2.12076900  |
| C | -6.43719300 | 0.75688000  | 2.73316400  |
| H | -6.43933100 | -0.12767300 | 3.36065500  |
| O | -8.80966800 | 0.51672000  | 2.28548300  |
| H | -8.66347200 | -0.45198300 | 2.37787900  |
| O | -8.76299600 | 2.65881800  | 0.60776700  |
| H | -9.39137400 | 1.90252300  | 0.56580100  |
| O | -6.42895300 | 4.03982400  | 0.19614000  |
| H | -7.11850500 | 3.95619800  | -0.49249000 |
| C | 0.89990000  | -4.28098400 | 2.67862100  |
| C | 1.48608800  | -3.08530000 | 2.25954600  |
| C | 0.68557100  | -2.04447700 | 1.80625500  |
| C | -0.69533700 | -2.17139900 | 1.77015200  |
| C | -1.28497200 | -3.36281100 | 2.19507600  |
| C | -0.48521100 | -4.40663900 | 2.65792700  |
| H | 1.52465000  | -5.11519000 | 2.98142600  |
| H | 1.12819300  | -1.13716400 | 1.41314600  |
| H | -2.36495400 | -3.47054600 | 2.19052200  |
| H | -0.95001200 | -5.32079400 | 3.01143400  |
| C | 2.96837900  | -2.92417400 | 2.15282800  |
| O | 3.71096000  | -3.85402300 | 1.82906500  |
| N | 3.38665300  | -1.65343000 | 2.39374700  |
| H | 2.67606400  | -0.99814600 | 2.72658300  |
| C | -1.44854800 | -0.99451100 | 1.24083800  |
| O | -1.01058400 | 0.15518300  | 1.35651100  |
| N | -2.60781700 | -1.31069100 | 0.63078900  |
| H | -2.75033800 | -2.29078700 | 0.39572000  |
| C | 4.59926800  | -1.04354600 | 2.02090400  |
| C | 4.66158800  | 0.32556600  | 2.13863000  |
| C | 5.70677000  | -1.76326400 | 1.49882000  |
| C | 5.79657100  | 1.03504000  | 1.68907500  |
| H | 3.81758100  | 0.88951300  | 2.53006500  |
| C | 6.82318400  | -1.08925100 | 1.07435000  |
| H | 5.65254000  | -2.83992300 | 1.41677400  |
| C | 5.81444800  | 2.45058100  | 1.73336400  |
| C | 6.89830100  | 0.32943800  | 1.12834700  |
| H | 7.65200600  | -1.65831900 | 0.66874000  |
| C | 6.88014000  | 3.14020400  | 1.22356700  |
| H | 4.95832000  | 2.97516100  | 2.15057900  |
| C | 7.98107000  | 1.10029900  | 0.61183900  |
| C | 7.97975300  | 2.47001900  | 0.65014700  |
| H | 8.78969700  | 3.03804700  | 0.20691600  |
| C | -3.54470400 | -0.43689100 | 0.03350400  |
| C | -4.86104900 | -0.80834100 | 0.08620900  |
| C | -3.17692800 | 0.75864800  | -0.63141600 |



|   |              |             |             |
|---|--------------|-------------|-------------|
| C | -5.84953900  | -0.05889700 | -0.59200600 |
| H | -5.15953400  | -1.69083000 | 0.64737000  |
| C | -4.12244200  | 1.50832200  | -1.28400500 |
| H | -2.14130400  | 1.07348400  | -0.61209900 |
| C | -7.19950800  | -0.47744700 | -0.52233000 |
| C | -5.48688900  | 1.09630000  | -1.34128900 |
| H | -3.82890400  | 2.44705400  | -1.73040800 |
| C | -8.16343000  | 0.17177400  | -1.24008800 |
| H | -7.45325100  | -1.30071100 | 0.13465200  |
| C | -6.53315700  | 1.74103100  | -2.07448600 |
| C | -7.83236600  | 1.28840900  | -2.03599000 |
| H | -8.60745700  | 1.78503900  | -2.61923300 |
| S | 6.80511700   | 4.92001800  | 1.22473300  |
| S | 9.21449000   | 0.30909000  | -0.40026300 |
| S | -9.85999700  | -0.36843700 | -1.13660000 |
| S | -6.32329300  | 3.14555800  | -3.18176500 |
| O | 10.20360800  | 1.35423100  | -0.75940400 |
| O | 9.79498800   | -0.83182200 | 0.32873500  |
| O | 5.54087600   | 5.27080400  | 0.52255300  |
| O | 8.01999100   | 5.38042700  | 0.51527600  |
| O | -6.89058500  | 2.67905200  | -4.47048300 |
| O | -4.87257100  | 3.43732200  | -3.30942900 |
| O | -10.53998900 | 0.59731500  | -0.24194000 |
| O | -9.79333200  | -1.73945300 | -0.53134300 |
| O | -10.37318800 | -0.37815000 | -2.51331300 |
| O | -7.09319100  | 4.24150600  | -2.55054200 |
| O | 6.75568500   | 5.32561100  | 2.65209800  |
| O | 8.43262200   | -0.13321700 | -1.60371000 |
| O | -8.85496300  | -2.18808800 | 2.01921400  |
| H | -8.17568600  | -2.74533700 | 1.60406200  |
| H | -9.43586000  | -1.97884800 | 1.25643100  |
| O | -5.52143300  | -2.96963200 | -2.02474900 |
| H | -6.24254000  | -3.25229200 | -1.42164200 |
| H | -5.67470900  | -2.01883100 | -2.13549700 |
| O | 1.24691200   | 0.57582800  | 3.08861700  |
| H | 0.49323000   | 0.55305000  | 2.45982400  |
| H | 1.62027200   | 1.48518400  | 3.09389000  |
| O | -13.08286400 | 0.12936500  | -1.57360800 |
| H | -12.40982900 | -0.08833700 | -2.23883400 |
| H | -12.51132700 | 0.47641700  | -0.86969700 |
| O | 5.44061300   | 4.70354900  | -2.24878400 |
| H | 5.33095200   | 4.95306700  | -1.31141400 |
| H | 6.36780000   | 4.98698000  | -2.43869000 |
| O | 9.01956800   | 7.12871200  | 2.61116400  |
| H | 8.25423300   | 6.66843900  | 2.99161000  |

|   |             |             |             |
|---|-------------|-------------|-------------|
| H | 9.02632700  | 6.73120200  | 1.72641100  |
| O | 10.46300000 | -2.33971700 | -2.11393500 |
| H | 10.47197600 | -1.51809500 | -2.65153200 |
| H | 10.26270500 | -2.03049900 | -1.21262100 |
| O | 6.39798700  | 2.20540400  | -1.96808700 |
| H | 5.75835600  | 1.48433800  | -2.05750400 |
| H | 5.91489400  | 3.06261000  | -2.07810300 |
| O | 2.78418100  | -6.62967900 | 1.74339800  |
| H | 3.28666800  | -5.80742500 | 1.87191600  |
| H | 2.14430200  | -6.36410300 | 1.06312800  |
| O | 10.76501200 | 0.21306200  | -3.33736200 |
| H | 11.05542900 | 0.58290000  | -2.48622800 |
| H | 9.91446200  | 0.67764100  | -3.45325500 |
| O | -4.59205800 | 0.82460000  | -4.39597500 |
| H | -4.32069100 | 1.67531000  | -4.00088300 |
| H | -5.41947500 | 1.06881300  | -4.84511800 |
| O | 3.09201400  | -0.87129800 | -4.88489800 |
| H | 2.58443800  | -1.54942500 | -4.40909400 |
| H | 3.85405800  | -0.73846200 | -4.30391600 |
| O | 3.91357900  | 5.16890800  | 2.79205100  |
| H | 4.81463300  | 5.26434100  | 3.15670000  |
| H | 4.11189600  | 5.26802800  | 1.84034100  |
| O | 9.27473000  | -4.74602800 | -2.70060300 |
| H | 9.87295600  | -5.24365200 | -2.12839300 |
| H | 9.53914300  | -3.80702000 | -2.54828900 |
| O | 2.74143600  | 2.82557000  | 3.48758200  |
| H | 3.08244100  | 3.70432500  | 3.18339800  |
| H | 3.13102500  | 2.69874400  | 4.36263000  |
| O | -7.75154600 | -3.53243900 | -0.36237200 |
| H | -8.10314300 | -4.43045800 | -0.44070800 |
| H | -8.48661000 | -2.93796400 | -0.65024000 |
| O | -9.52818200 | 3.65911300  | -3.99529000 |
| H | -9.00049100 | 4.10991100  | -3.31581500 |
| H | -8.81726000 | 3.21883200  | -4.49074400 |
| O | -3.93156400 | 4.87895900  | -1.02039800 |
| H | -4.16966400 | 4.59898800  | -1.91997000 |
| H | -4.74610200 | 4.68089600  | -0.52680500 |
| O | 8.86402800  | 2.50895800  | -2.97507700 |
| H | 9.39789200  | 2.28384800  | -2.19028100 |
| H | 7.95230000  | 2.22183900  | -2.71072900 |
| O | 8.12374100  | 5.14713200  | -2.36561600 |
| H | 8.20577600  | 5.20188400  | -1.39543600 |
| H | 8.46029300  | 4.25793700  | -2.61647500 |

1: GC 8 = 1:3 complex

Number of imaginary frequency = 0

Sum of electronic and zero-point Energies = -9134.510493 au

Sum of electronic and thermal Energies = -9134.347284 au

Sum of electronic and thermal Enthalpies = -9134.346340 au

Sum of electronic and thermal Free Energies = -9134.715403 au

|   |             |             |             |
|---|-------------|-------------|-------------|
| C | -1.42692300 | -0.92366300 | 4.25051800  |
| C | -1.34889500 | -1.81281200 | 5.32478500  |
| H | -2.25411900 | -2.08221600 | 5.85524600  |
| C | -0.11168100 | -2.33977200 | 5.69013100  |
| C | -0.27881600 | -0.54068600 | 3.56590100  |
| H | -0.29294800 | 0.21397500  | 2.78870800  |
| O | -2.66459800 | -0.49892200 | 3.86922800  |
| H | -2.58962100 | 0.33073900  | 3.34094600  |
| O | 0.03284900  | -3.22461300 | 6.70239600  |
| H | -0.84750700 | -3.46805100 | 7.06145700  |
| C | 0.94353800  | -1.10349100 | 3.93950200  |
| C | 1.06198000  | -2.00468400 | 4.99269200  |
| C | 2.39060400  | -2.62482800 | 5.33639300  |
| H | 2.43369100  | -3.66069800 | 4.96683500  |
| H | 2.51845200  | -2.66796100 | 6.42489100  |
| C | 3.53592400  | -1.85445600 | 4.68244600  |
| H | 3.71910800  | -0.90193100 | 5.20030100  |
| C | 3.17405700  | -1.55118000 | 3.22726500  |
| H | 2.95739100  | -2.51932600 | 2.75386900  |
| O | 2.00996900  | -0.73023600 | 3.18461600  |
| C | 4.23481800  | -0.84141500 | 2.43251800  |
| O | 4.72228700  | -2.64344700 | 4.65056600  |
| H | 4.90546800  | -2.93812900 | 5.55464100  |
| C | 5.22669000  | -1.57687900 | 1.79725000  |
| H | 5.23669100  | -2.65699200 | 1.86416800  |
| C | 6.16771600  | -0.93876300 | 0.99727000  |
| C | 6.15225300  | 0.45718500  | 0.83900900  |
| C | 5.16966900  | 1.18559700  | 1.52398500  |
| C | 4.20155600  | 0.53759800  | 2.28880400  |
| H | 3.39367900  | 1.11491500  | 2.71770700  |
| O | 5.13593100  | 2.55225800  | 1.50698600  |
| H | 5.71650500  | 2.96084300  | 0.79977600  |
| O | 7.01591700  | 1.12450300  | 0.03500900  |
| H | 7.78143600  | 0.55151600  | -0.27548500 |
| O | 7.13132200  | -1.63970200 | 0.34250600  |
| H | 6.98799300  | -2.60225800 | 0.50798500  |
| C | 3.53976900  | 5.61449700  | -0.69650300 |
| C | 3.59139100  | 6.86196500  | -0.07422300 |

|   |             |            |             |
|---|-------------|------------|-------------|
| H | 4.32536400  | 7.59470000 | -0.38922400 |
| C | 2.70676300  | 7.13754400 | 0.97049200  |
| C | 2.60834600  | 4.66429200 | -0.30136200 |
| H | 2.63408500  | 3.66252200 | -0.69976100 |
| O | 4.43574900  | 5.34015900 | -1.68799200 |
| H | 4.17018400  | 4.48941500 | -2.10914200 |
| O | 2.72970300  | 8.30823200 | 1.64646200  |
| H | 3.43988800  | 8.88374000 | 1.29314100  |
| C | 1.71115700  | 4.98854100 | 0.70665900  |
| C | 1.73876600  | 6.20525700 | 1.38044900  |
| C | 0.84959800  | 6.45307300 | 2.57091700  |
| H | 0.42824500  | 7.46208300 | 2.54231500  |
| H | 1.43750000  | 6.37351400 | 3.49488400  |
| C | -0.28757500 | 5.43902000 | 2.60414600  |
| H | -0.80265100 | 5.45231900 | 3.56896900  |
| C | 0.21272900  | 4.01817400 | 2.31953000  |
| H | -0.66255300 | 3.36583100 | 2.23127300  |
| O | 0.78308100  | 4.01212300 | 1.00213900  |
| C | 1.14122000  | 3.42496100 | 3.35412900  |
| O | -1.28006700 | 5.76104400 | 1.62863300  |
| H | -0.93158100 | 5.47982200 | 0.76594700  |
| C | 0.57349400  | 2.64580100 | 4.36341000  |
| H | -0.49812400 | 2.46782700 | 4.39856800  |
| C | 1.38862600  | 2.00452700 | 5.29276100  |
| C | 2.77126400  | 2.15932000 | 5.21816900  |
| C | 3.33612300  | 2.94858800 | 4.21868700  |
| C | 2.52720800  | 3.58834400 | 3.28761000  |
| H | 3.00920800  | 4.13505500 | 2.48631600  |
| O | 4.69942800  | 2.98238400 | 4.18556200  |
| H | 4.98471800  | 2.99515400 | 3.23950800  |
| O | 3.56114100  | 1.45785500 | 6.08991800  |
| H | 4.46781200  | 1.53653300 | 5.74096700  |
| O | 0.83847600  | 1.19901600 | 6.23969500  |
| H | 1.55412700  | 0.66834800 | 6.62594800  |
| C | -2.60726700 | 1.56826700 | 0.97613200  |
| C | -3.43609800 | 2.33936600 | 0.15905100  |
| H | -4.05476900 | 3.12793600 | 0.57707200  |
| C | -3.44881200 | 2.08839400 | -1.21437300 |
| C | -1.78734800 | 0.58792300 | 0.42962400  |
| H | -1.10952000 | 0.01080000 | 1.04377100  |
| O | -2.57660400 | 1.76022600 | 2.33008300  |
| H | -2.93976700 | 2.68095200 | 2.55756500  |
| O | -4.27682000 | 2.78471500 | -2.03706200 |
| H | -4.97028000 | 3.23100800 | -1.49366400 |
| C | -1.76913700 | 0.41343400 | -0.95293100 |

|   |             |             |             |
|---|-------------|-------------|-------------|
| C | -2.61445700 | 1.13041400  | -1.80278300 |
| C | -2.62461900 | 0.89639100  | -3.29357400 |
| H | -2.26975600 | 1.79195700  | -3.81963200 |
| H | -3.64566700 | 0.71272900  | -3.64387800 |
| C | -1.69544400 | -0.25008900 | -3.68196800 |
| H | -2.18400600 | -1.22347100 | -3.51188700 |
| C | -0.45763300 | -0.19506000 | -2.77592800 |
| H | -0.06924300 | 0.82884000  | -2.78659600 |
| O | -0.87399000 | -0.49302600 | -1.44164300 |
| C | 0.63334600  | -1.14049900 | -3.19643900 |
| O | -1.34992000 | -0.08499300 | -5.04094300 |
| H | -0.62269700 | -0.70203500 | -5.22356100 |
| C | 1.66665300  | -0.63334800 | -3.98928300 |
| H | 1.71751200  | 0.42719500  | -4.22534800 |
| C | 2.67774400  | -1.48220500 | -4.43618300 |
| C | 2.64681400  | -2.83838500 | -4.10939000 |
| C | 1.62815900  | -3.34475600 | -3.29207100 |
| C | 0.61013100  | -2.49287600 | -2.85707000 |
| H | -0.15992400 | -2.89053700 | -2.20375200 |
| O | 1.60275400  | -4.64871400 | -2.92264200 |
| H | 2.50306100  | -5.04297100 | -2.96018000 |
| O | 3.62758000  | -3.67734600 | -4.55684800 |
| H | 4.46977400  | -3.18190400 | -4.66899800 |
| O | 3.73934000  | -1.07215400 | -5.18151900 |
| H | 3.87480500  | -0.11229800 | -5.03303700 |
| C | -0.40218800 | -5.03436000 | 4.13199000  |
| C | -0.45121200 | -4.21708500 | 3.00121200  |
| C | -1.68168900 | -3.74333800 | 2.54406200  |
| C | -2.85568200 | -4.10994100 | 3.20249900  |
| C | -2.80094400 | -4.95927500 | 4.30861900  |
| C | -1.57182500 | -5.39860800 | 4.79107900  |
| H | 0.56450900  | -5.38637300 | 4.47524900  |
| H | -1.74949900 | -3.14702600 | 1.63772400  |
| H | -3.73821500 | -5.28592400 | 4.75399200  |
| H | -1.52345100 | -6.03452400 | 5.66987700  |
| C | 0.84517000  | -3.97559300 | 2.28592300  |
| O | 1.81931300  | -4.68314100 | 2.54236500  |
| N | 0.86130400  | -2.99556300 | 1.33916000  |
| H | 0.14377100  | -2.28088500 | 1.39285300  |
| C | -4.20344200 | -3.72699000 | 2.67147900  |
| O | -5.16224800 | -4.47539600 | 2.79660700  |
| N | -4.23680600 | -2.52241400 | 2.02728200  |
| H | -3.54088600 | -1.83587400 | 2.31566600  |
| C | 1.94936200  | -2.73375700 | 0.47168200  |
| C | 2.19430000  | -1.45846300 | 0.02517400  |

|   |              |             |             |
|---|--------------|-------------|-------------|
| C | 2.75307000   | -3.80253600 | 0.00707800  |
| C | 3.27849100   | -1.20496200 | -0.85260200 |
| H | 1.56608000   | -0.62257200 | 0.32517200  |
| C | 3.82123900   | -3.57274300 | -0.81621400 |
| H | 2.50184000   | -4.81817500 | 0.28438900  |
| C | 3.46864400   | 0.10838300  | -1.34855300 |
| C | 4.14622300   | -2.26370900 | -1.26157200 |
| H | 4.37595800   | -4.41978700 | -1.18536500 |
| C | 4.48829700   | 0.35473600  | -2.22743100 |
| H | 2.76184900   | 0.88277900  | -1.06440100 |
| C | 5.23660000   | -1.93101000 | -2.12472900 |
| C | 5.39399500   | -0.65555700 | -2.60642000 |
| H | 6.19180000   | -0.43778700 | -3.31261800 |
| C | -5.30547700  | -2.05152000 | 1.24147300  |
| C | -5.49407800  | -0.69780200 | 1.11438900  |
| C | -6.11907600  | -2.95404400 | 0.50493100  |
| C | -6.49726500  | -0.19690700 | 0.25192800  |
| H | -4.86511000  | 0.00533200  | 1.65674700  |
| C | -7.10363300  | -2.48333200 | -0.32267700 |
| H | -5.96479900  | -4.02366800 | 0.58049900  |
| C | -6.65768600  | 1.19937300  | 0.08713900  |
| C | -7.32882900  | -1.09054500 | -0.47870100 |
| H | -7.70207400  | -3.20036700 | -0.87066500 |
| C | -7.57431500  | 1.68545300  | -0.80342400 |
| H | -6.03655300  | 1.87659300  | 0.66177000  |
| C | -8.31805500  | -0.52831900 | -1.34158400 |
| C | -8.43419600  | 0.82519300  | -1.52263300 |
| H | -9.16983700  | 1.22395800  | -2.21240500 |
| S | 4.58326500   | 1.89726100  | -3.09127200 |
| S | 6.48701700   | -3.06120900 | -2.75291400 |
| S | -7.65895700  | 3.44746000  | -1.01893800 |
| S | -9.45438800  | -1.59237400 | -2.21948200 |
| O | 6.26640200   | -4.40565500 | -2.13748000 |
| O | 6.27291000   | -3.08239500 | -4.22296900 |
| O | 3.59848300   | 2.81952600  | -2.47370600 |
| O | 4.23444500   | 1.57703500  | -4.50407800 |
| O | -8.62139200  | -2.44647600 | -3.11027900 |
| O | -10.34622000 | -0.68288700 | -2.97748400 |
| O | -7.88452100  | 3.69559000  | -2.46481400 |
| O | -6.29861400  | 3.91489700  | -0.60142900 |
| O | -8.73206000  | 3.97445400  | -0.16143700 |
| O | -10.16128000 | -2.37662300 | -1.17850500 |
| O | 5.98102500   | 2.39165200  | -2.96171900 |
| O | 7.79322500   | -2.48491700 | -2.38589000 |
| O | 4.70092500   | -4.75505100 | 2.61273300  |

|   |              |             |             |
|---|--------------|-------------|-------------|
| H | 4.78884400   | -4.09858300 | 3.33078900  |
| H | 3.75006000   | -4.73576300 | 2.39467100  |
| O | -9.23051100  | -5.22464800 | -2.80698800 |
| H | -8.85287600  | -4.34299600 | -2.98251900 |
| H | -10.20054800 | -5.04933700 | -2.84909100 |
| O | -2.50533500  | -4.05258600 | 7.44624600  |
| H | -2.92285700  | -4.08951400 | 6.57185300  |
| H | -3.08045300  | -3.49396500 | 7.98839200  |
| O | 8.60742800   | -6.17575800 | -2.37060700 |
| H | 8.99982400   | -5.57897100 | -1.70443100 |
| H | 7.74301700   | -5.76271600 | -2.51352000 |
| O | -5.48299100  | 5.01994100  | -3.23537300 |
| H | -4.70337900  | 4.44300700  | -3.26093800 |
| H | -6.23113500  | 4.40575600  | -3.09477800 |
| O | 9.22793900   | -4.13573000 | -0.51082400 |
| H | 8.50148500   | -4.31872800 | 0.11077000  |
| H | 8.83509600   | -3.50624100 | -1.14431300 |
| O | -5.42154900  | 6.65305400  | -0.65648900 |
| H | -5.22133500  | 5.90916800  | -1.25453500 |
| H | -6.35477000  | 6.81059900  | -0.90193000 |
| O | 7.86162200   | 3.13155600  | -5.00910900 |
| H | 7.11978400   | 3.28564000  | -4.39807900 |
| H | 8.36205300   | 2.44014600  | -4.52576200 |
| O | -5.50942900  | 5.17037400  | 1.66146000  |
| H | -5.39541700  | 5.86017800  | 0.96161400  |
| H | -5.88881800  | 4.44598900  | 1.12819500  |
| O | 6.65974600   | -4.31703500 | 0.64933000  |
| H | 6.33703200   | -4.51429400 | -0.25057800 |
| H | 5.94632000   | -4.54340600 | 1.29216200  |
| O | -9.25501400  | -4.93662700 | -0.08207600 |
| H | -9.19223000  | -5.18941500 | -1.03439800 |
| H | -9.51431300  | -4.00170000 | -0.13146200 |
| O | 4.10804100   | -6.01380700 | -3.24110200 |
| H | 4.05169500   | -5.46709000 | -4.04410400 |
| H | 4.89118600   | -5.63094000 | -2.80471300 |
| O | -11.78788700 | -4.33337200 | -2.52526100 |
| H | -12.01312000 | -3.72157300 | -3.26302800 |
| H | -11.40652000 | -3.73358900 | -1.85860000 |
| O | 6.48656800   | 3.78017100  | -0.40547100 |
| H | 5.90304600   | 4.38329200  | -0.89981200 |
| H | 6.62111300   | 3.01158900  | -0.98757100 |
| O | 8.42766300   | 0.95271900  | -3.40766700 |
| H | 7.57056000   | 1.25099500  | -3.04771600 |
| H | 8.20085800   | 0.21578700  | -4.04351400 |
| O | 7.68474200   | -0.79669600 | -5.25884800 |

|   |              |             |             |
|---|--------------|-------------|-------------|
| H | 7.07609000   | -0.19218400 | -5.75077500 |
| H | 7.18691400   | -1.59780500 | -5.00915600 |
| O | 9.03432600   | -0.20991300 | -1.00973600 |
| H | 8.57959900   | -1.06948500 | -1.05374500 |
| H | 8.99395200   | 0.13876400  | -1.92748100 |
| O | -3.25380800  | 4.21235700  | 2.79535200  |
| H | -2.62804600  | 4.74981900  | 2.26576300  |
| H | -4.13911300  | 4.54085200  | 2.49327300  |
| O | 0.92410600   | 2.00617200  | -1.21601700 |
| H | 0.73199400   | 2.61435200  | -0.48232200 |
| H | 1.56540600   | 2.46742800  | -1.78129500 |
| O | 6.34003500   | 1.26414600  | -6.36291900 |
| H | 5.54269500   | 1.42981600  | -5.82857400 |
| H | 6.95805200   | 1.96480200  | -6.05326000 |
| O | 4.75645600   | 9.93311900  | 0.64672100  |
| H | 4.67073700   | 10.24598600 | -0.26441800 |
| H | 5.65972400   | 9.59488200  | 0.71877000  |
| O | -12.17337500 | -2.32703200 | -4.36945600 |
| H | -11.89663400 | -1.64167900 | -3.73465600 |
| H | -11.41013200 | -2.32210100 | -4.98525600 |
| O | -7.63239600  | 6.63970900  | -2.37667600 |
| H | -8.07540600  | 5.77327600  | -2.35579900 |
| H | -6.83965900  | 6.45755800  | -2.91020500 |
| O | -7.63306000  | 3.48930000  | 2.44271300  |
| H | -7.16577300  | 4.33188400  | 2.55463400  |
| H | -8.19852100  | 3.64911100  | 1.66601400  |
| O | -9.74024200  | -1.72120800 | -5.58893400 |
| H | -9.90250300  | -0.90809500 | -5.08146100 |
| H | -9.19431300  | -2.21115200 | -4.94463200 |
| O | -6.90950100  | -6.04693400 | 1.03108800  |
| H | -7.72710700  | -5.59523300 | 0.73396300  |
| H | -6.58713100  | -5.52988300 | 1.78406900  |
